# Supplementary material for: Surface lowering of the debris-covered area of Kanchenjunga Glacier in the eastern Nepal Himalaya since 1975, as revealed by Hexagon KH-9 and ALOS satellite observations
Source: Copernicus journal article supplement (doi:10.5194/tc-11-2815-2017), 2017-12-11
Supplement: Supplementary file 1 [file lamsal2017tc_supplement.xlsx]

## Sheet: fig2a
off-glacier rate of elevation change				on-glacier rate of elevation change
Easting_UTM45N (m)	Northing_UTM45N (m)	rate of elevation change (m a-1)		Easting_UTM45N (m)	Northing_UTM45N (m)	rate of elevation change (m a-1)
601522	3.07609e+06	0.248317		614168	3.08135e+06	0.377573
601538	3.07609e+06	0.214304		614182	3.08135e+06	0.446296
601552	3.07609e+06	0.155957		614198	3.08135e+06	0.550259
601568	3.07609e+06	0.1099		614212	3.08135e+06	0.529479
601582	3.07609e+06	0.0860676		614228	3.08135e+06	0.440923
601598	3.07609e+06	0.0760646		614242	3.08135e+06	0.418781
601612	3.07609e+06	0.0732606		614258	3.08135e+06	0.344196
601628	3.07609e+06	0.0634046		614272	3.08135e+06	0.331764
601478	3.07607e+06	0.0657713		614288	3.08135e+06	0.40586
601492	3.07607e+06	0.174079		614302	3.08135e+06	0.42397
601508	3.07607e+06	0.248266		614318	3.08135e+06	0.302425
601522	3.07607e+06	0.235714		614332	3.08135e+06	0.214116
601538	3.07607e+06	0.189639		614152	3.08134e+06	0.401036
601552	3.07607e+06	0.146109		614168	3.08134e+06	0.387105
601568	3.07607e+06	0.124922		614182	3.08134e+06	0.468411
601582	3.07607e+06	0.10781		614198	3.08134e+06	0.556967
601598	3.07607e+06	0.0910716		614212	3.08134e+06	0.532281
601612	3.07607e+06	0.0846008		614228	3.08134e+06	0.433392
601628	3.07607e+06	0.072345		614242	3.08134e+06	0.396497
601642	3.07607e+06	0.0573044		614258	3.08134e+06	0.329235
601658	3.07607e+06	0.0633477		614272	3.08134e+06	0.310964
601672	3.07607e+06	0.060585		614288	3.08134e+06	0.359541
601688	3.07607e+06	0.0488156		614302	3.08134e+06	0.380534
601702	3.07607e+06	0.0459116		614318	3.08134e+06	0.261961
601448	3.07606e+06	0.0705331		614332	3.08134e+06	0.143455
601462	3.07606e+06	0.0360575		614348	3.08134e+06	0.0823823
601478	3.07606e+06	0.0378921		614362	3.08134e+06	0.100629
601492	3.07606e+06	0.112694		614378	3.08134e+06	0.266568
601508	3.07606e+06	0.174565		614392	3.08134e+06	0.213959
601522	3.07606e+06	0.164246		614138	3.08132e+06	0.561485
601538	3.07606e+06	0.137794		614152	3.08132e+06	0.39072
601552	3.07606e+06	0.132464		614168	3.08132e+06	0.396577
601568	3.07606e+06	0.139044		614182	3.08132e+06	0.481937
601582	3.07606e+06	0.131832		614198	3.08132e+06	0.53913
601598	3.07606e+06	0.102508		614212	3.08132e+06	0.511064
601612	3.07606e+06	0.0806232		614228	3.08132e+06	0.425632
601628	3.07606e+06	0.0770336		614242	3.08132e+06	0.354504
601642	3.07606e+06	0.0658963		614258	3.08132e+06	0.311899
601658	3.07606e+06	0.0642679		614272	3.08132e+06	0.284852
601672	3.07606e+06	0.0644961		614288	3.08132e+06	0.283135
601688	3.07606e+06	0.0563478		614302	3.08132e+06	0.263092
601702	3.07606e+06	0.0718649		614318	3.08132e+06	0.161212
601718	3.07606e+06	0.112946		614332	3.08132e+06	0.053526
601732	3.07606e+06	0.147061		614348	3.08132e+06	0.031538
601748	3.07606e+06	0.160439		614362	3.08132e+06	0.0559306
601762	3.07606e+06	0.164768		614378	3.08132e+06	0.247514
601432	3.07604e+06	0.134504		614392	3.08132e+06	0.137282
601448	3.07604e+06	0.104387		614408	3.08132e+06	0.0211532
601462	3.07604e+06	0.0616765		614422	3.08132e+06	-0.024221
601478	3.07604e+06	0.0249299		614122	3.08131e+06	0.660744
601492	3.07604e+06	0.0374724		614138	3.08131e+06	0.53358
601508	3.07604e+06	0.0631544		614152	3.08131e+06	0.361006
601522	3.07604e+06	0.0697566		614168	3.08131e+06	0.404997
601538	3.07604e+06	0.0881379		614182	3.08131e+06	0.500956
601552	3.07604e+06	0.107839		614198	3.08131e+06	0.570629
601568	3.07604e+06	0.123698		614212	3.08131e+06	0.547548
601582	3.07604e+06	0.112488		614228	3.08131e+06	0.431743
601598	3.07604e+06	0.0758631		614242	3.08131e+06	0.317963
601612	3.07604e+06	0.0657776		614258	3.08131e+06	0.273743
601628	3.07604e+06	0.0665981		614272	3.08131e+06	0.25076
601642	3.07604e+06	0.0696474		614288	3.08131e+06	0.23676
601658	3.07604e+06	0.0747289		614302	3.08131e+06	0.206578
601672	3.07604e+06	0.0798423		614318	3.08131e+06	0.111326
601688	3.07604e+06	0.0810873		614332	3.08131e+06	0.0230964
601702	3.07604e+06	0.111946		614348	3.08131e+06	0.000318444
601718	3.07604e+06	0.156029		614362	3.08131e+06	0.0823443
601732	3.07604e+06	0.18082		614378	3.08131e+06	0.258789
601748	3.07604e+06	0.189865		614392	3.08131e+06	0.160839
601762	3.07604e+06	0.182743		614408	3.08131e+06	0.0206099
601778	3.07604e+06	0.17182		614422	3.08131e+06	-0.0205589
601418	3.07603e+06	0.153313		614438	3.08131e+06	-0.032561
601432	3.07603e+06	0.156378		614108	3.08129e+06	0.631843
601448	3.07603e+06	0.147645		614122	3.08129e+06	0.573144
601462	3.07603e+06	0.113153		614138	3.08129e+06	0.37518
601478	3.07603e+06	0.0505596		614152	3.08129e+06	0.310444
601492	3.07603e+06	0.0220896		614168	3.08129e+06	0.41998
601508	3.07603e+06	0.017976		614182	3.08129e+06	0.507571
601522	3.07603e+06	0.0151641		614198	3.08129e+06	0.589029
601538	3.07603e+06	0.0110107		614212	3.08129e+06	0.585471
601552	3.07603e+06	0.0376798		614228	3.08129e+06	0.482985
601568	3.07603e+06	0.0736503		614242	3.08129e+06	0.355422
601582	3.07603e+06	0.0644516		614258	3.08129e+06	0.255578
601598	3.07603e+06	0.0576294		614272	3.08129e+06	0.21408
601612	3.07603e+06	0.0672729		614288	3.08129e+06	0.189147
601628	3.07603e+06	0.0779731		614302	3.08129e+06	0.184079
601642	3.07603e+06	0.0873901		614318	3.08129e+06	0.104318
601658	3.07603e+06	0.0966077		614332	3.08129e+06	-0.00297644
601672	3.07603e+06	0.106134		614348	3.08129e+06	-0.0169349
601688	3.07603e+06	0.116527		614362	3.08129e+06	0.15379
601702	3.07603e+06	0.150622		614378	3.08129e+06	0.247007
601718	3.07603e+06	0.185327		614392	3.08129e+06	0.136018
601732	3.07603e+06	0.20665		614408	3.08129e+06	0.003173
601748	3.07603e+06	0.215642		614422	3.08129e+06	-0.0158368
601762	3.07603e+06	0.209591		614438	3.08129e+06	-0.0406761
601778	3.07603e+06	0.192957		614452	3.08129e+06	-0.0687294
601792	3.07603e+06	0.18499		614108	3.08128e+06	0.598993
601418	3.07601e+06	0.158887		614122	3.08128e+06	0.511026
601432	3.07601e+06	0.18056		614138	3.08128e+06	0.360387
601448	3.07601e+06	0.1746		614152	3.08128e+06	0.300996
601462	3.07601e+06	0.150565		614168	3.08128e+06	0.388853
601478	3.07601e+06	0.0831672		614182	3.08128e+06	0.455599
601492	3.07601e+06	0.035443		614198	3.08128e+06	0.507758
601508	3.07601e+06	0.0131826		614212	3.08128e+06	0.54222
601522	3.07601e+06	-0.0342037		614228	3.08128e+06	0.503678
601538	3.07601e+06	-0.0585279		614242	3.08128e+06	0.398429
601552	3.07601e+06	-0.0283969		614258	3.08128e+06	0.264039
601568	3.07601e+06	0.0232794		614272	3.08128e+06	0.196497
601582	3.07601e+06	0.0408987		614288	3.08128e+06	0.205577
601598	3.07601e+06	0.0418744		614302	3.08128e+06	0.174655
601612	3.07601e+06	0.0652185		614318	3.08128e+06	0.055072
601628	3.07601e+06	0.098176		614332	3.08128e+06	-0.0490542
601642	3.07601e+06	0.117224		614348	3.08128e+06	-0.0292112
601658	3.07601e+06	0.123804		614362	3.08128e+06	0.209808
601672	3.07601e+06	0.129144		614378	3.08128e+06	0.195638
601688	3.07601e+06	0.13929		614392	3.08128e+06	0.0582052
601702	3.07601e+06	0.170619		614408	3.08128e+06	-0.0220572
601718	3.07601e+06	0.215867		614422	3.08128e+06	-0.0143938
601732	3.07601e+06	0.237407		614438	3.08128e+06	-0.0328082
601748	3.07601e+06	0.242146		614452	3.08128e+06	-0.0757153
601762	3.07601e+06	0.233555		614468	3.08128e+06	-0.0957168
601778	3.07601e+06	0.221006		614108	3.08126e+06	0.541329
601792	3.07601e+06	0.204226		614122	3.08126e+06	0.508945
601808	3.07601e+06	0.206011		614138	3.08126e+06	0.412427
601402	3.076e+06	0.156271		614152	3.08126e+06	0.286944
601418	3.076e+06	0.166348		614168	3.08126e+06	0.276304
601432	3.076e+06	0.195995		614182	3.08126e+06	0.347138
601448	3.076e+06	0.186173		614198	3.08126e+06	0.383338
601462	3.076e+06	0.161931		614212	3.08126e+06	0.444015
601478	3.076e+06	0.0917671		614228	3.08126e+06	0.447223
601492	3.076e+06	0.0474914		614242	3.08126e+06	0.388184
601508	3.076e+06	0.0208952		614258	3.08126e+06	0.239223
601522	3.076e+06	-0.0515539		614272	3.08126e+06	0.182016
601538	3.076e+06	-0.0786941		614288	3.08126e+06	0.193511
601552	3.076e+06	-0.0514144		614302	3.08126e+06	0.132726
601568	3.076e+06	0.00810725		614318	3.08126e+06	-0.002018
601582	3.076e+06	0.0377938		614332	3.08126e+06	-0.0711452
601598	3.076e+06	0.0401017		614348	3.08126e+06	-0.0225567
601612	3.076e+06	0.0554813		614362	3.08126e+06	0.204585
601628	3.076e+06	0.0893037		614378	3.08126e+06	0.184626
601642	3.076e+06	0.115211		614392	3.08126e+06	0.0154252
601658	3.076e+06	0.135222		614408	3.08126e+06	-0.0368048
601672	3.076e+06	0.147357		614422	3.08126e+06	-0.00627744
601688	3.076e+06	0.148517		614438	3.08126e+06	-0.0139376
601702	3.076e+06	0.197256		614452	3.08126e+06	-0.0606303
601718	3.076e+06	0.245356		614468	3.08126e+06	-0.0987029
601732	3.076e+06	0.260482		614482	3.08126e+06	-0.107878
601748	3.076e+06	0.256346		614092	3.08125e+06	0.353401
601762	3.076e+06	0.257672		614108	3.08125e+06	0.448396
601778	3.076e+06	0.249218		614122	3.08125e+06	0.504238
601792	3.076e+06	0.233048		614138	3.08125e+06	0.408096
601808	3.076e+06	0.225836		614152	3.08125e+06	0.259654
601822	3.076e+06	0.241819		614168	3.08125e+06	0.180241
601402	3.07598e+06	0.163494		614182	3.08125e+06	0.241923
601418	3.07598e+06	0.182586		614198	3.08125e+06	0.297715
601432	3.07598e+06	0.212048		614212	3.08125e+06	0.371906
601448	3.07598e+06	0.202244		614228	3.08125e+06	0.414209
601462	3.07598e+06	0.159925		614242	3.08125e+06	0.331996
601478	3.07598e+06	0.0851884		614258	3.08125e+06	0.179259
601492	3.07598e+06	0.0513659		614272	3.08125e+06	0.142565
601508	3.07598e+06	0.0244101		614288	3.08125e+06	0.143096
601522	3.07598e+06	-0.0420544		614302	3.08125e+06	0.0992857
601538	3.07598e+06	-0.0641544		614318	3.08125e+06	-0.0191222
601552	3.07598e+06	-0.0484791		614332	3.08125e+06	-0.0593409
601568	3.07598e+06	-0.000440306		614348	3.08125e+06	-0.025455
601582	3.07598e+06	0.0320786		614362	3.08125e+06	0.164718
601598	3.07598e+06	0.0404091		614378	3.08125e+06	0.174718
601612	3.07598e+06	0.0492845		614392	3.08125e+06	0.013762
601628	3.07598e+06	0.0743837		614408	3.08125e+06	-0.0254489
601642	3.07598e+06	0.105923		614422	3.08125e+06	0.0131962
601658	3.07598e+06	0.140285		614438	3.08125e+06	0.0218878
601672	3.07598e+06	0.161363		614452	3.08125e+06	-0.0193044
601688	3.07598e+06	0.160215		614468	3.08125e+06	-0.0711437
601702	3.07598e+06	0.178024		614482	3.08125e+06	-0.0893971
601718	3.07598e+06	0.240757		614092	3.08123e+06	0.276179
601732	3.07598e+06	0.260518		614108	3.08123e+06	0.387217
601748	3.07598e+06	0.273716		614122	3.08123e+06	0.46276
601762	3.07598e+06	0.277982		614138	3.08123e+06	0.369788
601778	3.07598e+06	0.266542		614152	3.08123e+06	0.282854
601792	3.07598e+06	0.248394		614168	3.08123e+06	0.166072
601808	3.07598e+06	0.236738		614182	3.08123e+06	0.0985397
601822	3.07598e+06	0.23386		614198	3.08123e+06	0.106621
601838	3.07598e+06	0.206681		614212	3.08123e+06	0.247196
601402	3.07597e+06	0.178166		614228	3.08123e+06	0.338701
601418	3.07597e+06	0.193263		614242	3.08123e+06	0.224259
601432	3.07597e+06	0.220423		614258	3.08123e+06	0.102664
601448	3.07597e+06	0.215349		614272	3.08123e+06	0.0991258
601462	3.07597e+06	0.171978		614288	3.08123e+06	0.105391
601478	3.07597e+06	0.0980683		614302	3.08123e+06	0.0983006
601492	3.07597e+06	0.0597281		614318	3.08123e+06	-0.00999511
601508	3.07597e+06	0.0417349		614332	3.08123e+06	-0.0603008
601522	3.07597e+06	0.00763825		614348	3.08123e+06	-0.0104388
601538	3.07597e+06	-0.0216095		614362	3.08123e+06	0.172353
601552	3.07597e+06	-0.0285015		614378	3.08123e+06	0.167659
601568	3.07597e+06	-0.00738308		614392	3.08123e+06	0.0345081
601582	3.07597e+06	0.0307291		614408	3.08123e+06	-0.0333056
601598	3.07597e+06	0.0462369		614422	3.08123e+06	0.000296222
601612	3.07597e+06	0.0516938		614438	3.08123e+06	0.0191489
601628	3.07597e+06	0.0797378		614452	3.08123e+06	0.00999644
601642	3.07597e+06	0.120315		614468	3.08123e+06	-0.0264942
601658	3.07597e+06	0.158518		614482	3.08123e+06	-0.055197
601672	3.07597e+06	0.182992		614498	3.08123e+06	-0.054181
601688	3.07597e+06	0.185639		610478	3.08122e+06	0.404197
601702	3.07597e+06	0.185175		610492	3.08122e+06	0.374278
601718	3.07597e+06	0.212564		610508	3.08122e+06	0.337261
601732	3.07597e+06	0.248251		610522	3.08122e+06	0.304696
601748	3.07597e+06	0.278261		610538	3.08122e+06	0.286505
601762	3.07597e+06	0.286394		610552	3.08122e+06	0.284631
601778	3.07597e+06	0.273195		610568	3.08122e+06	0.300403
601792	3.07597e+06	0.247852		610582	3.08122e+06	0.322536
601808	3.07597e+06	0.22619		610598	3.08122e+06	0.334687
601822	3.07597e+06	0.196082		610612	3.08122e+06	0.319152
601838	3.07597e+06	0.142765		610628	3.08122e+06	0.298852
601852	3.07597e+06	0.0924596		614092	3.08122e+06	0.274178
601388	3.07595e+06	0.236791		614108	3.08122e+06	0.389137
601402	3.07595e+06	0.216357		614122	3.08122e+06	0.42928
601418	3.07595e+06	0.21304		614138	3.08122e+06	0.386645
601432	3.07595e+06	0.223037		614152	3.08122e+06	0.329268
601448	3.07595e+06	0.206132		614168	3.08122e+06	0.191032
601462	3.07595e+06	0.172377		614182	3.08122e+06	0.0766482
601478	3.07595e+06	0.11001		614198	3.08122e+06	0.0151907
601492	3.07595e+06	0.0732827		614212	3.08122e+06	-0.0191938
601508	3.07595e+06	0.0570541		614228	3.08122e+06	-0.0175891
601522	3.07595e+06	0.0500735		614242	3.08122e+06	-0.0778967
601538	3.07595e+06	0.0200224		614258	3.08122e+06	0.024974
601552	3.07595e+06	-0.0042753		614272	3.08122e+06	0.0791479
601568	3.07595e+06	0.00580892		614288	3.08122e+06	0.113408
601582	3.07595e+06	0.046628		614302	3.08122e+06	0.059146
601598	3.07595e+06	0.063707		614318	3.08122e+06	-0.0409122
601612	3.07595e+06	0.0654244		614332	3.08122e+06	-0.0885857
601628	3.07595e+06	0.0947276		614348	3.08122e+06	0.00126433
601642	3.07595e+06	0.139266		614362	3.08122e+06	0.229038
601658	3.07595e+06	0.178745		614378	3.08122e+06	0.180954
601672	3.07595e+06	0.203187		614392	3.08122e+06	-0.0124459
601688	3.07595e+06	0.211864		614408	3.08122e+06	-0.0738856
601702	3.07595e+06	0.207765		614422	3.08122e+06	-0.0274414
601718	3.07595e+06	0.211817		614438	3.08122e+06	0.00497056
601732	3.07595e+06	0.241372		614452	3.08122e+06	0.00690422
601748	3.07595e+06	0.280902		614468	3.08122e+06	-0.0102387
601762	3.07595e+06	0.304463		614482	3.08122e+06	-0.0233769
601778	3.07595e+06	0.296514		614498	3.08122e+06	-0.0317137
601792	3.07595e+06	0.256652		610418	3.0812e+06	0.501796
601808	3.07595e+06	0.216445		610432	3.0812e+06	0.455619
601822	3.07595e+06	0.197885		610448	3.0812e+06	0.422702
601838	3.07595e+06	0.1575		610462	3.0812e+06	0.393255
601852	3.07595e+06	0.124442		610478	3.0812e+06	0.362015
601868	3.07595e+06	0.146106		610492	3.0812e+06	0.3202
601388	3.07594e+06	0.236653		610508	3.0812e+06	0.280955
601402	3.07594e+06	0.225704		610522	3.0812e+06	0.252365
601418	3.07594e+06	0.215044		610538	3.0812e+06	0.235819
601432	3.07594e+06	0.210852		610552	3.0812e+06	0.234327
601448	3.07594e+06	0.18954		610568	3.0812e+06	0.250922
601462	3.07594e+06	0.141268		610582	3.0812e+06	0.274628
601478	3.07594e+06	0.0937311		610598	3.0812e+06	0.287877
601492	3.07594e+06	0.0750712		610612	3.0812e+06	0.279461
601508	3.07594e+06	0.0578495		610628	3.0812e+06	0.253952
601522	3.07594e+06	0.0659345		610642	3.0812e+06	0.231165
601538	3.07594e+06	0.0497944		610658	3.0812e+06	0.215304
601552	3.07594e+06	0.0264014		610672	3.0812e+06	0.196773
601568	3.07594e+06	0.0318252		614092	3.0812e+06	0.248246
601582	3.07594e+06	0.0655589		614108	3.0812e+06	0.437755
601598	3.07594e+06	0.0879289		614122	3.0812e+06	0.430693
601612	3.07594e+06	0.0871432		614138	3.0812e+06	0.383878
601628	3.07594e+06	0.114102		614152	3.0812e+06	0.325927
601642	3.07594e+06	0.15759		614168	3.0812e+06	0.20036
601658	3.07594e+06	0.192007		614182	3.0812e+06	0.110402
601672	3.07594e+06	0.213285		614198	3.0812e+06	0.02981
601688	3.07594e+06	0.226106		614212	3.0812e+06	-0.11356
601702	3.07594e+06	0.226694		614228	3.0812e+06	-0.190785
601718	3.07594e+06	0.226092		614242	3.0812e+06	-0.146883
601732	3.07594e+06	0.245633		614258	3.0812e+06	-0.024462
601748	3.07594e+06	0.277063		614272	3.0812e+06	0.037508
601762	3.07594e+06	0.299579		614288	3.0812e+06	0.0928959
601778	3.07594e+06	0.29988		614302	3.0812e+06	0.0243624
601792	3.07594e+06	0.266336		614318	3.0812e+06	-0.0944766
601808	3.07594e+06	0.214383		614332	3.0812e+06	-0.114169
601822	3.07594e+06	0.210519		614348	3.0812e+06	-0.0165406
601838	3.07594e+06	0.2252		614362	3.0812e+06	0.252604
601852	3.07594e+06	0.224095		614378	3.0812e+06	0.113127
601868	3.07594e+06	0.214697		614392	3.0812e+06	-0.0772659
601388	3.07592e+06	0.236494		614408	3.0812e+06	-0.0877872
601402	3.07592e+06	0.229827		614422	3.0812e+06	-0.0319132
601418	3.07592e+06	0.202789		614438	3.0812e+06	0.00355444
601432	3.07592e+06	0.187711		614452	3.0812e+06	0.00866578
601448	3.07592e+06	0.166516		614468	3.0812e+06	-0.00284167
601462	3.07592e+06	0.112748		614482	3.0812e+06	-0.0109769
601478	3.07592e+06	0.0849699		614498	3.0812e+06	-0.0173193
601492	3.07592e+06	0.0765268		614512	3.0812e+06	-0.016722
601508	3.07592e+06	0.0704679		610388	3.08119e+06	0.744305
601522	3.07592e+06	0.0876486		610402	3.08119e+06	0.64725
601538	3.07592e+06	0.0904063		610418	3.08119e+06	0.51408
601552	3.07592e+06	0.0760595		610432	3.08119e+06	0.408035
601568	3.07592e+06	0.0765252		610448	3.08119e+06	0.365017
601582	3.07592e+06	0.0959156		610462	3.08119e+06	0.331977
601598	3.07592e+06	0.117531		610478	3.08119e+06	0.297199
601612	3.07592e+06	0.111468		610492	3.08119e+06	0.257091
601628	3.07592e+06	0.130793		610508	3.08119e+06	0.22203
601642	3.07592e+06	0.166252		610522	3.08119e+06	0.196517
601658	3.07592e+06	0.195142		610538	3.08119e+06	0.181985
601672	3.07592e+06	0.213935		610552	3.08119e+06	0.184054
601688	3.07592e+06	0.225519		610568	3.08119e+06	0.202114
601702	3.07592e+06	0.230602		610582	3.08119e+06	0.221766
601718	3.07592e+06	0.23706		610598	3.08119e+06	0.22156
601732	3.07592e+06	0.249517		610612	3.08119e+06	0.208517
601748	3.07592e+06	0.267597		610628	3.08119e+06	0.189065
601762	3.07592e+06	0.281342		610642	3.08119e+06	0.171863
601778	3.07592e+06	0.279775		610658	3.08119e+06	0.156481
601792	3.07592e+06	0.250685		610672	3.08119e+06	0.144537
601808	3.07592e+06	0.201202		610688	3.08119e+06	0.142398
601822	3.07592e+06	0.201394		610702	3.08119e+06	0.143131
601838	3.07592e+06	0.256202		610718	3.08119e+06	0.142449
601852	3.07592e+06	0.29477		614092	3.08119e+06	0.255545
601868	3.07592e+06	0.223358		614108	3.08119e+06	0.468483
601882	3.07592e+06	0.170727		614122	3.08119e+06	0.474987
601388	3.07591e+06	0.236113		614138	3.08119e+06	0.364062
601402	3.07591e+06	0.234862		614152	3.08119e+06	0.309184
601418	3.07591e+06	0.201627		614168	3.08119e+06	0.248279
601432	3.07591e+06	0.18162		614182	3.08119e+06	0.182179
601448	3.07591e+06	0.165493		614198	3.08119e+06	0.110203
601462	3.07591e+06	0.125928		614212	3.08119e+06	-0.0470746
601478	3.07591e+06	0.0996334		614228	3.08119e+06	-0.121722
601492	3.07591e+06	0.0930277		614242	3.08119e+06	-0.0797291
601508	3.07591e+06	0.0977975		614258	3.08119e+06	-0.0311972
601522	3.07591e+06	0.115383		614272	3.08119e+06	0.024787
601538	3.07591e+06	0.130167		614288	3.08119e+06	0.104104
601552	3.07591e+06	0.133669		614302	3.08119e+06	0.0116949
601568	3.07591e+06	0.130012		614318	3.08119e+06	-0.0973452
601582	3.07591e+06	0.130264		614332	3.08119e+06	-0.133789
601598	3.07591e+06	0.133834		614348	3.08119e+06	-0.0671109
601612	3.07591e+06	0.123445		614362	3.08119e+06	0.177462
601628	3.07591e+06	0.139055		614378	3.08119e+06	0.0514164
601642	3.07591e+06	0.166809		614392	3.08119e+06	-0.0948394
601658	3.07591e+06	0.193228		614408	3.08119e+06	-0.0793048
601672	3.07591e+06	0.21067		614422	3.08119e+06	-0.0213857
601688	3.07591e+06	0.216648		614438	3.08119e+06	0.0140406
601702	3.07591e+06	0.221109		614452	3.08119e+06	0.0188004
601718	3.07591e+06	0.234466		614468	3.08119e+06	0.00906489
601732	3.07591e+06	0.254867		614482	3.08119e+06	0.00626
601748	3.07591e+06	0.270916		614498	3.08119e+06	0.00985744
601762	3.07591e+06	0.276067		614512	3.08119e+06	0.0112024
601778	3.07591e+06	0.251568		610358	3.08117e+06	0.727731
601792	3.07591e+06	0.228527		610372	3.08117e+06	0.718034
601808	3.07591e+06	0.186005		610388	3.08117e+06	0.68682
601822	3.07591e+06	0.18677		610402	3.08117e+06	0.611364
601838	3.07591e+06	0.241454		610418	3.08117e+06	0.466372
601852	3.07591e+06	0.298684		610432	3.08117e+06	0.337692
601868	3.07591e+06	0.261163		610448	3.08117e+06	0.292379
601882	3.07591e+06	0.207242		610462	3.08117e+06	0.259414
601372	3.07589e+06	0.216333		610478	3.08117e+06	0.228316
601388	3.07589e+06	0.231636		610492	3.08117e+06	0.193351
601402	3.07589e+06	0.227782		610508	3.08117e+06	0.165918
601418	3.07589e+06	0.196524		610522	3.08117e+06	0.149606
601432	3.07589e+06	0.178823		610538	3.08117e+06	0.13879
601448	3.07589e+06	0.169971		610552	3.08117e+06	0.139052
601462	3.07589e+06	0.142461		610568	3.08117e+06	0.151846
601478	3.07589e+06	0.117902		610582	3.08117e+06	0.156554
601492	3.07589e+06	0.114688		610598	3.08117e+06	0.146698
601508	3.07589e+06	0.121292		610612	3.08117e+06	0.141794
601522	3.07589e+06	0.130305		610628	3.08117e+06	0.13559
601538	3.07589e+06	0.15127		610642	3.08117e+06	0.118453
601552	3.07589e+06	0.163429		610658	3.08117e+06	0.0975117
601568	3.07589e+06	0.155457		610672	3.08117e+06	0.0813449
601582	3.07589e+06	0.131536		610688	3.08117e+06	0.0795881
601598	3.07589e+06	0.119776		610702	3.08117e+06	0.0923066
601612	3.07589e+06	0.128365		610718	3.08117e+06	0.104725
601628	3.07589e+06	0.147083		610732	3.08117e+06	0.109645
601642	3.07589e+06	0.161386		610748	3.08117e+06	0.125855
601658	3.07589e+06	0.185013		614092	3.08117e+06	0.246571
601672	3.07589e+06	0.203548		614108	3.08117e+06	0.477988
601688	3.07589e+06	0.205656		614122	3.08117e+06	0.54334
601702	3.07589e+06	0.207811		614138	3.08117e+06	0.395016
601718	3.07589e+06	0.227502		614152	3.08117e+06	0.324435
601732	3.07589e+06	0.255736		614168	3.08117e+06	0.293641
601748	3.07589e+06	0.273955		614182	3.08117e+06	0.24798
601762	3.07589e+06	0.27406		614198	3.08117e+06	0.193444
601778	3.07589e+06	0.234345		614212	3.08117e+06	0.0996328
601792	3.07589e+06	0.217841		614228	3.08117e+06	0.0320069
601808	3.07589e+06	0.19907		614242	3.08117e+06	0.0128433
601822	3.07589e+06	0.195067		614258	3.08117e+06	0.011557
601838	3.07589e+06	0.21245		614272	3.08117e+06	0.0843357
601852	3.07589e+06	0.244591		614288	3.08117e+06	0.0712417
601868	3.07589e+06	0.247407		614302	3.08117e+06	-0.000453222
601882	3.07589e+06	0.223989		614318	3.08117e+06	-0.0742087
601372	3.07588e+06	0.182835		614332	3.08117e+06	-0.111987
601388	3.07588e+06	0.192523		614348	3.08117e+06	-0.0899477
601402	3.07588e+06	0.194983		614362	3.08117e+06	0.0965346
601418	3.07588e+06	0.168308		614378	3.08117e+06	0.0742897
601432	3.07588e+06	0.149822		614392	3.08117e+06	-0.0621938
601448	3.07588e+06	0.142345		614408	3.08117e+06	-0.0664358
601462	3.07588e+06	0.136141		614422	3.08117e+06	-0.00926345
601478	3.07588e+06	0.142941		614438	3.08117e+06	0.0221841
601492	3.07588e+06	0.149657		614452	3.08117e+06	0.0283016
601508	3.07588e+06	0.149355		614468	3.08117e+06	0.031457
601522	3.07588e+06	0.141252		614482	3.08117e+06	0.0479563
601538	3.07588e+06	0.148719		614498	3.08117e+06	0.0615871
601552	3.07588e+06	0.157085		614512	3.08117e+06	0.0608619
601568	3.07588e+06	0.141847		610358	3.08116e+06	0.693061
601582	3.07588e+06	0.123753		610372	3.08116e+06	0.653276
601598	3.07588e+06	0.124127		610388	3.08116e+06	0.603165
601612	3.07588e+06	0.161717		610402	3.08116e+06	0.541804
601628	3.07588e+06	0.161113		610418	3.08116e+06	0.395584
601642	3.07588e+06	0.150611		610432	3.08116e+06	0.26901
601658	3.07588e+06	0.166452		610448	3.08116e+06	0.220368
601672	3.07588e+06	0.18451		610462	3.08116e+06	0.183417
601688	3.07588e+06	0.185591		610478	3.08116e+06	0.153192
601702	3.07588e+06	0.178647		610492	3.08116e+06	0.123149
601718	3.07588e+06	0.188573		610508	3.08116e+06	0.100723
601732	3.07588e+06	0.219333		610522	3.08116e+06	0.0900288
601748	3.07588e+06	0.251878		610538	3.08116e+06	0.085674
601762	3.07588e+06	0.257633		610552	3.08116e+06	0.0845146
601778	3.07588e+06	0.230043		610568	3.08116e+06	0.0885208
601792	3.07588e+06	0.222262		610582	3.08116e+06	0.086878
601808	3.07588e+06	0.223247		610598	3.08116e+06	0.0815634
601822	3.07588e+06	0.206615		610612	3.08116e+06	0.082178
601838	3.07588e+06	0.180945		610628	3.08116e+06	0.0836623
601852	3.07588e+06	0.172769		610642	3.08116e+06	0.0690338
601868	3.07588e+06	0.179159		610658	3.08116e+06	0.0459843
601882	3.07588e+06	0.170577		610672	3.08116e+06	0.0277156
601372	3.07586e+06	0.135167		610688	3.08116e+06	0.0227036
601388	3.07586e+06	0.149798		610702	3.08116e+06	0.0298096
601402	3.07586e+06	0.155982		610718	3.08116e+06	0.0424915
601418	3.07586e+06	0.138639		610732	3.08116e+06	0.0682497
601432	3.07586e+06	0.126112		610748	3.08116e+06	0.104779
601448	3.07586e+06	0.124264		610762	3.08116e+06	0.131836
601462	3.07586e+06	0.151408		614092	3.08116e+06	0.262098
601478	3.07586e+06	0.185366		614108	3.08116e+06	0.455585
601492	3.07586e+06	0.196111		614122	3.08116e+06	0.556262
601508	3.07586e+06	0.186973		614138	3.08116e+06	0.464438
601522	3.07586e+06	0.165107		614152	3.08116e+06	0.399633
601538	3.07586e+06	0.15728		614168	3.08116e+06	0.345342
601552	3.07586e+06	0.155748		614182	3.08116e+06	0.27159
601568	3.07586e+06	0.15019		614198	3.08116e+06	0.216941
601582	3.07586e+06	0.145648		614212	3.08116e+06	0.138562
601598	3.07586e+06	0.171204		614228	3.08116e+06	0.0535448
601612	3.07586e+06	0.193841		614242	3.08116e+06	0.0343494
601628	3.07586e+06	0.175545		614258	3.08116e+06	0.0522589
601642	3.07586e+06	0.147858		614272	3.08116e+06	0.0596101
601658	3.07586e+06	0.150484		614288	3.08116e+06	0.0373418
601672	3.07586e+06	0.161899		614302	3.08116e+06	-0.00551733
601688	3.07586e+06	0.163195		614318	3.08116e+06	-0.0380688
601702	3.07586e+06	0.164956		614332	3.08116e+06	-0.0750768
601718	3.07586e+06	0.171061		614348	3.08116e+06	-0.0511674
601732	3.07586e+06	0.187869		614362	3.08116e+06	0.131792
601748	3.07586e+06	0.220318		614378	3.08116e+06	0.113875
601762	3.07586e+06	0.241035		614392	3.08116e+06	-0.0542164
601778	3.07586e+06	0.230808		614408	3.08116e+06	-0.0573529
601792	3.07586e+06	0.224883		614422	3.08116e+06	-0.00890844
601808	3.07586e+06	0.21159		614438	3.08116e+06	0.0222632
601822	3.07586e+06	0.192816		614452	3.08116e+06	0.0430569
601838	3.07586e+06	0.175381		614468	3.08116e+06	0.0621162
601852	3.07586e+06	0.160174		614482	3.08116e+06	0.0955966
601868	3.07586e+06	0.151387		614498	3.08116e+06	0.113647
601882	3.07586e+06	0.136861		614512	3.08116e+06	0.105681
601372	3.07585e+06	0.123899		614528	3.08116e+06	0.0637863
601388	3.07585e+06	0.140332		610342	3.08114e+06	0.687161
601402	3.07585e+06	0.150177		610358	3.08114e+06	0.661691
601418	3.07585e+06	0.137878		610372	3.08114e+06	0.595639
601432	3.07585e+06	0.126155		610388	3.08114e+06	0.505879
601448	3.07585e+06	0.125933		610402	3.08114e+06	0.44586
601462	3.07585e+06	0.160087		610418	3.08114e+06	0.329981
601478	3.07585e+06	0.214598		610432	3.08114e+06	0.201114
601492	3.07585e+06	0.227198		610448	3.08114e+06	0.14963
601508	3.07585e+06	0.20908		610462	3.08114e+06	0.107727
601522	3.07585e+06	0.190413		610478	3.08114e+06	0.0755789
601538	3.07585e+06	0.189588		610492	3.08114e+06	0.0490778
601552	3.07585e+06	0.196041		610508	3.08114e+06	0.0297222
601568	3.07585e+06	0.194323		610522	3.08114e+06	0.0203708
601582	3.07585e+06	0.200467		610538	3.08114e+06	0.0167622
601598	3.07585e+06	0.2155		610552	3.08114e+06	0.016203
601612	3.07585e+06	0.210016		610568	3.08114e+06	0.0177048
601628	3.07585e+06	0.184814		610582	3.08114e+06	0.0150434
601642	3.07585e+06	0.150739		610598	3.08114e+06	0.0122557
601658	3.07585e+06	0.145726		610612	3.08114e+06	0.0203057
601672	3.07585e+06	0.153302		610628	3.08114e+06	0.0265924
601688	3.07585e+06	0.159214		610642	3.08114e+06	0.0190636
601702	3.07585e+06	0.167861		610658	3.08114e+06	-0.00113244
601718	3.07585e+06	0.170584		610672	3.08114e+06	-0.018197
601732	3.07585e+06	0.177511		610688	3.08114e+06	-0.024373
601748	3.07585e+06	0.200792		610702	3.08114e+06	-0.0242163
601762	3.07585e+06	0.220386		610718	3.08114e+06	-0.0118453
601778	3.07585e+06	0.213003		610732	3.08114e+06	0.0166827
601792	3.07585e+06	0.206848		610748	3.08114e+06	0.057505
601808	3.07585e+06	0.182034		610762	3.08114e+06	0.103285
601822	3.07585e+06	0.143852		610778	3.08114e+06	0.128253
601838	3.07585e+06	0.14546		614092	3.08114e+06	0.28037
601852	3.07585e+06	0.163139		614108	3.08114e+06	0.493662
601868	3.07585e+06	0.164741		614122	3.08114e+06	0.622859
601882	3.07585e+06	0.146047		614138	3.08114e+06	0.620792
601372	3.07583e+06	0.133703		614152	3.08114e+06	0.562211
601388	3.07583e+06	0.146902		614168	3.08114e+06	0.483758
601402	3.07583e+06	0.155632		614182	3.08114e+06	0.364733
601418	3.07583e+06	0.141194		614198	3.08114e+06	0.255642
601432	3.07583e+06	0.13297		614212	3.08114e+06	0.149828
601448	3.07583e+06	0.139388		614228	3.08114e+06	0.0783288
601462	3.07583e+06	0.166613		614242	3.08114e+06	0.0267934
601478	3.07583e+06	0.209845		614258	3.08114e+06	0.0612719
601492	3.07583e+06	0.22224		614272	3.08114e+06	0.0836166
601508	3.07583e+06	0.216406		614288	3.08114e+06	0.0819009
601522	3.07583e+06	0.217656		614302	3.08114e+06	0.0666275
601538	3.07583e+06	0.232002		614318	3.08114e+06	0.0101772
601552	3.07583e+06	0.242124		614332	3.08114e+06	-0.0612179
601568	3.07583e+06	0.243033		614348	3.08114e+06	-0.0304769
601582	3.07583e+06	0.246634		614362	3.08114e+06	0.180189
601598	3.07583e+06	0.237828		614378	3.08114e+06	0.0741011
601612	3.07583e+06	0.22575		614392	3.08114e+06	-0.0722398
601628	3.07583e+06	0.194942		614408	3.08114e+06	-0.0639966
601642	3.07583e+06	0.162505		614422	3.08114e+06	-0.0203924
601658	3.07583e+06	0.152753		614438	3.08114e+06	0.0198284
601672	3.07583e+06	0.167771		614452	3.08114e+06	0.0538666
601688	3.07583e+06	0.183974		614468	3.08114e+06	0.0824534
601702	3.07583e+06	0.192043		614482	3.08114e+06	0.122981
601718	3.07583e+06	0.185374		614498	3.08114e+06	0.142709
601732	3.07583e+06	0.181549		614512	3.08114e+06	0.131739
601748	3.07583e+06	0.192016		614528	3.08114e+06	0.0740917
601762	3.07583e+06	0.19646		610342	3.08113e+06	0.638236
601778	3.07583e+06	0.187478		610358	3.08113e+06	0.587711
601792	3.07583e+06	0.173296		610372	3.08113e+06	0.44964
601808	3.07583e+06	0.163249		610388	3.08113e+06	0.339287
601822	3.07583e+06	0.110788		610402	3.08113e+06	0.296342
601838	3.07583e+06	0.0940067		610418	3.08113e+06	0.230153
601852	3.07583e+06	0.138289		610432	3.08113e+06	0.128757
601868	3.07583e+06	0.184429		610448	3.08113e+06	0.077171
601882	3.07583e+06	0.19251		610462	3.08113e+06	0.0345571
601372	3.07582e+06	0.141986		610478	3.08113e+06	-9.17779e-05
601388	3.07582e+06	0.162574		610492	3.08113e+06	-0.0251494
601402	3.07582e+06	0.159501		610508	3.08113e+06	-0.0439138
601418	3.07582e+06	0.141257		610522	3.08113e+06	-0.0560603
601432	3.07582e+06	0.148387		610538	3.08113e+06	-0.0625518
601448	3.07582e+06	0.1612		610552	3.08113e+06	-0.0641516
601462	3.07582e+06	0.180779		610568	3.08113e+06	-0.0632425
601478	3.07582e+06	0.204237		610582	3.08113e+06	-0.0624853
601492	3.07582e+06	0.226872		610598	3.08113e+06	-0.0547834
601508	3.07582e+06	0.240618		610612	3.08113e+06	-0.0439947
601522	3.07582e+06	0.250008		610628	3.08113e+06	-0.0344397
601538	3.07582e+06	0.269332		610642	3.08113e+06	-0.0334704
601552	3.07582e+06	0.275918		610658	3.08113e+06	-0.0471391
601568	3.07582e+06	0.275978		610672	3.08113e+06	-0.0607049
601582	3.07582e+06	0.273338		610688	3.08113e+06	-0.0654886
601598	3.07582e+06	0.261648		610702	3.08113e+06	-0.0664295
601612	3.07582e+06	0.246371		610718	3.08113e+06	-0.0551414
601628	3.07582e+06	0.218294		610732	3.08113e+06	-0.0278169
601642	3.07582e+06	0.184004		610748	3.08113e+06	0.0111451
601658	3.07582e+06	0.17114		610762	3.08113e+06	0.0545602
601672	3.07582e+06	0.192141		610778	3.08113e+06	0.0926643
601688	3.07582e+06	0.213863		610792	3.08113e+06	0.109211
601702	3.07582e+06	0.21917		614092	3.08113e+06	0.281555
601718	3.07582e+06	0.208791		614108	3.08113e+06	0.461599
601732	3.07582e+06	0.194904		614122	3.08113e+06	0.673281
601748	3.07582e+06	0.192526		614138	3.08113e+06	0.735244
601762	3.07582e+06	0.180977		614152	3.08113e+06	0.675654
601778	3.07582e+06	0.150861		614168	3.08113e+06	0.587275
601792	3.07582e+06	0.144885		614182	3.08113e+06	0.482079
601808	3.07582e+06	0.171728		614198	3.08113e+06	0.32651
601822	3.07582e+06	0.121254		614212	3.08113e+06	0.158971
601838	3.07582e+06	0.0837834		614228	3.08113e+06	0.0737698
601852	3.07582e+06	0.112886		614242	3.08113e+06	0.0320493
601868	3.07582e+06	0.191588		614258	3.08113e+06	0.111938
601882	3.07582e+06	0.243021		614272	3.08113e+06	0.176451
601372	3.0758e+06	0.142927		614288	3.08113e+06	0.195549
601388	3.0758e+06	0.17529		614302	3.08113e+06	0.125426
601402	3.0758e+06	0.169846		614318	3.08113e+06	0.000774778
601418	3.0758e+06	0.146177		614332	3.08113e+06	-0.0747283
601432	3.0758e+06	0.16201		614348	3.08113e+06	-0.0491731
601448	3.0758e+06	0.185839		614362	3.08113e+06	0.139433
601462	3.0758e+06	0.217402		614378	3.08113e+06	0.0334864
601478	3.0758e+06	0.245072		614392	3.08113e+06	-0.0814827
601492	3.0758e+06	0.278443		614408	3.08113e+06	-0.0733469
601508	3.0758e+06	0.293173		614422	3.08113e+06	-0.0357877
601522	3.0758e+06	0.301977		614438	3.08113e+06	0.00479633
601538	3.0758e+06	0.302595		614452	3.08113e+06	0.0443638
601552	3.0758e+06	0.29308		614468	3.08113e+06	0.0798083
601568	3.0758e+06	0.289973		614482	3.08113e+06	0.122272
601582	3.0758e+06	0.291554		614498	3.08113e+06	0.144296
601598	3.0758e+06	0.283858		614512	3.08113e+06	0.140328
601612	3.0758e+06	0.263911		614528	3.08113e+06	0.0957867
601628	3.0758e+06	0.234656		614542	3.08113e+06	0.0341606
601642	3.0758e+06	0.198899		610328	3.08111e+06	0.546048
601658	3.0758e+06	0.188736		610342	3.08111e+06	0.548397
601672	3.0758e+06	0.206887		610358	3.08111e+06	0.431452
601688	3.0758e+06	0.22702		610372	3.08111e+06	0.267978
601702	3.0758e+06	0.230092		610388	3.08111e+06	0.187408
601718	3.0758e+06	0.222287		610402	3.08111e+06	0.138741
601732	3.0758e+06	0.206078		610418	3.08111e+06	0.0915968
601748	3.0758e+06	0.195807		610432	3.08111e+06	0.0417961
601762	3.0758e+06	0.166264		610448	3.08111e+06	-0.000419666
601778	3.0758e+06	0.114382		610462	3.08111e+06	-0.0397463
601792	3.0758e+06	0.130826		610478	3.08111e+06	-0.0735323
601808	3.0758e+06	0.184169		610492	3.08111e+06	-0.0983812
601822	3.0758e+06	0.158468		610508	3.08111e+06	-0.119218
601838	3.0758e+06	0.107398		610522	3.08111e+06	-0.135532
601852	3.0758e+06	0.12727		610538	3.08111e+06	-0.145237
601868	3.0758e+06	0.170937		610552	3.08111e+06	-0.147339
601882	3.0758e+06	0.165053		610568	3.08111e+06	-0.142462
601388	3.07579e+06	0.190326		610582	3.08111e+06	-0.13288
601402	3.07579e+06	0.176158		610598	3.08111e+06	-0.120502
601418	3.07579e+06	0.170736		610612	3.08111e+06	-0.108683
601432	3.07579e+06	0.207562		610628	3.08111e+06	-0.0965057
601448	3.07579e+06	0.248953		610642	3.08111e+06	-0.0886506
601462	3.07579e+06	0.280349		610658	3.08111e+06	-0.091272
601478	3.07579e+06	0.307751		610672	3.08111e+06	-0.0957278
601492	3.07579e+06	0.322049		610688	3.08111e+06	-0.0959323
601508	3.07579e+06	0.324281		610702	3.08111e+06	-0.0950818
601522	3.07579e+06	0.318375		610718	3.08111e+06	-0.0858894
601538	3.07579e+06	0.298852		610732	3.08111e+06	-0.0621019
601552	3.07579e+06	0.281307		610748	3.08111e+06	-0.0266051
601568	3.07579e+06	0.276375		610762	3.08111e+06	0.0126104
601582	3.07579e+06	0.285183		610778	3.08111e+06	0.0482494
601598	3.07579e+06	0.291535		610792	3.08111e+06	0.0719641
601612	3.07579e+06	0.279144		610808	3.08111e+06	0.076397
601628	3.07579e+06	0.243229		614092	3.08111e+06	0.360317
601642	3.07579e+06	0.205506		614108	3.08111e+06	0.518024
601658	3.07579e+06	0.189433		614122	3.08111e+06	0.67187
601672	3.07579e+06	0.19687		614138	3.08111e+06	0.725113
601688	3.07579e+06	0.215023		614152	3.08111e+06	0.677209
601702	3.07579e+06	0.220924		614168	3.08111e+06	0.527586
601718	3.07579e+06	0.215134		614182	3.08111e+06	0.385769
601732	3.07579e+06	0.203041		614198	3.08111e+06	0.246964
601748	3.07579e+06	0.192709		614212	3.08111e+06	0.0331111
601762	3.07579e+06	0.174836		614228	3.08111e+06	-0.0355249
601778	3.07579e+06	0.133456		614242	3.08111e+06	0.0340314
601792	3.07579e+06	0.124818		614258	3.08111e+06	0.142156
601808	3.07579e+06	0.168507		614272	3.08111e+06	0.236356
601822	3.07579e+06	0.151978		614288	3.08111e+06	0.238956
601838	3.07579e+06	0.130072		614302	3.08111e+06	0.111668
601852	3.07579e+06	0.171015		614318	3.08111e+06	-0.022932
601868	3.07579e+06	0.0993529		614332	3.08111e+06	-0.0841122
601882	3.07579e+06	0.00641008		614348	3.08111e+06	-0.0880217
601388	3.07577e+06	0.227051		614362	3.08111e+06	0.037638
601402	3.07577e+06	0.222584		614378	3.08111e+06	0.0825613
601418	3.07577e+06	0.223036		614392	3.08111e+06	-0.0457402
601432	3.07577e+06	0.275519		614408	3.08111e+06	-0.0551036
601448	3.07577e+06	0.316422		614422	3.08111e+06	-0.0252983
601462	3.07577e+06	0.342564		614438	3.08111e+06	0.0108489
601478	3.07577e+06	0.348065		614452	3.08111e+06	0.0502549
601492	3.07577e+06	0.337116		614468	3.08111e+06	0.0862649
601508	3.07577e+06	0.325774		614482	3.08111e+06	0.119514
601522	3.07577e+06	0.313661		614498	3.08111e+06	0.138561
601538	3.07577e+06	0.289818		614512	3.08111e+06	0.142096
601552	3.07577e+06	0.273349		614528	3.08111e+06	0.116303
601568	3.07577e+06	0.272679		614542	3.08111e+06	0.0357973
601582	3.07577e+06	0.281548		614558	3.08111e+06	-0.0527863
601598	3.07577e+06	0.2962		610328	3.0811e+06	0.435178
601612	3.07577e+06	0.30027		610342	3.0811e+06	0.414609
601628	3.07577e+06	0.273571		610358	3.0811e+06	0.278653
601642	3.07577e+06	0.210965		610372	3.0811e+06	0.147147
601658	3.07577e+06	0.17403		610388	3.0811e+06	0.0838572
601672	3.07577e+06	0.168148		610402	3.0811e+06	0.0341169
601688	3.07577e+06	0.179081		610418	3.0811e+06	-0.00817522
601702	3.07577e+06	0.188875		610432	3.0811e+06	-0.0456311
601718	3.07577e+06	0.188029		610448	3.0811e+06	-0.0812007
601732	3.07577e+06	0.187922		610462	3.0811e+06	-0.115316
601748	3.07577e+06	0.184045		610478	3.0811e+06	-0.144421
601762	3.07577e+06	0.171126		610492	3.0811e+06	-0.171444
601778	3.07577e+06	0.147487		610508	3.0811e+06	-0.197257
601792	3.07577e+06	0.128165		610522	3.0811e+06	-0.214831
601808	3.07577e+06	0.15105		610538	3.0811e+06	-0.22267
601822	3.07577e+06	0.153475		610552	3.0811e+06	-0.221045
601838	3.07577e+06	0.134419		610568	3.0811e+06	-0.21172
601852	3.07577e+06	0.16133		610582	3.0811e+06	-0.19893
601868	3.07577e+06	-0.0106569		610598	3.0811e+06	-0.185852
601882	3.07577e+06	-0.113737		610612	3.0811e+06	-0.173034
601388	3.07576e+06	0.249018		610628	3.0811e+06	-0.159948
601402	3.07576e+06	0.244985		610642	3.0811e+06	-0.146118
601418	3.07576e+06	0.269866		610658	3.0811e+06	-0.131719
601432	3.07576e+06	0.318919		610672	3.0811e+06	-0.123707
601448	3.07576e+06	0.34947		610688	3.0811e+06	-0.118283
601462	3.07576e+06	0.365694		610702	3.0811e+06	-0.114035
601478	3.07576e+06	0.366966		610718	3.0811e+06	-0.10412
601492	3.07576e+06	0.350259		610732	3.0811e+06	-0.0844148
601508	3.07576e+06	0.321065		610748	3.0811e+06	-0.0561681
601522	3.07576e+06	0.311189		610762	3.0811e+06	-0.0241071
601538	3.07576e+06	0.295201		610778	3.0811e+06	0.00562333
601552	3.07576e+06	0.284661		610792	3.0811e+06	0.0282146
601568	3.07576e+06	0.280114		610808	3.0811e+06	0.0388623
601582	3.07576e+06	0.277623		610822	3.0811e+06	0.0333405
601598	3.07576e+06	0.295076		614078	3.0811e+06	0.259573
601612	3.07576e+06	0.307369		614092	3.0811e+06	0.390026
601628	3.07576e+06	0.282611		614108	3.0811e+06	0.47856
601642	3.07576e+06	0.193071		614122	3.0811e+06	0.543862
601658	3.07576e+06	0.147756		614138	3.0811e+06	0.616845
601672	3.07576e+06	0.143326		614152	3.0811e+06	0.555522
601688	3.07576e+06	0.146583		614168	3.0811e+06	0.372475
601702	3.07576e+06	0.154747		614182	3.0811e+06	0.229927
601718	3.07576e+06	0.161146		614198	3.0811e+06	0.0742832
601732	3.07576e+06	0.168227		614212	3.0811e+06	-0.0653667
601748	3.07576e+06	0.168769		614228	3.0811e+06	-0.0773277
601762	3.07576e+06	0.158064		614242	3.0811e+06	0.0319294
601778	3.07576e+06	0.136019		614258	3.0811e+06	0.166559
601792	3.07576e+06	0.119378		614272	3.0811e+06	0.272666
601808	3.07576e+06	0.13051		614288	3.0811e+06	0.239177
601822	3.07576e+06	0.150166		614302	3.0811e+06	0.0940249
601838	3.07576e+06	0.140156		614318	3.0811e+06	-0.0257736
601852	3.07576e+06	0.123047		614332	3.0811e+06	-0.0641549
601868	3.07576e+06	-0.0844715		614348	3.0811e+06	-0.0732569
601882	3.07576e+06	-0.156209		614362	3.0811e+06	0.0118328
601402	3.07574e+06	0.241374		614378	3.0811e+06	0.0892857
601418	3.07574e+06	0.282988		614392	3.0811e+06	-0.0284316
601432	3.07574e+06	0.327302		614408	3.0811e+06	-0.03047
601448	3.07574e+06	0.364637		614422	3.0811e+06	0.000315
601462	3.07574e+06	0.387476		614438	3.0811e+06	0.0316471
601478	3.07574e+06	0.38839		614452	3.0811e+06	0.0599937
601492	3.07574e+06	0.361944		614468	3.0811e+06	0.0856377
601508	3.07574e+06	0.3164		614482	3.0811e+06	0.109341
601522	3.07574e+06	0.310121		614498	3.0811e+06	0.126217
601538	3.07574e+06	0.306918		614512	3.0811e+06	0.127254
601552	3.07574e+06	0.299349		614528	3.0811e+06	0.109855
601568	3.07574e+06	0.28078		614542	3.0811e+06	0.0595753
601582	3.07574e+06	0.264947		614558	3.0811e+06	-0.0583509
601598	3.07574e+06	0.271881		614572	3.0811e+06	-0.164889
601612	3.07574e+06	0.290477		610312	3.08108e+06	0.299441
601628	3.07574e+06	0.257054		610328	3.08108e+06	0.333147
601642	3.07574e+06	0.157793		610342	3.08108e+06	0.29594
601658	3.07574e+06	0.121197		610358	3.08108e+06	0.164038
601672	3.07574e+06	0.119304		610372	3.08108e+06	0.0206194
601688	3.07574e+06	0.127693		610388	3.08108e+06	-0.0129668
601702	3.07574e+06	0.134826		610402	3.08108e+06	-0.0536734
601718	3.07574e+06	0.142124		610418	3.08108e+06	-0.0929417
601732	3.07574e+06	0.149553		610432	3.08108e+06	-0.128144
601748	3.07574e+06	0.152271		610448	3.08108e+06	-0.15885
601762	3.07574e+06	0.144742		610462	3.08108e+06	-0.185396
601778	3.07574e+06	0.125018		610478	3.08108e+06	-0.210717
601792	3.07574e+06	0.109307		610492	3.08108e+06	-0.242214
601808	3.07574e+06	0.121453		610508	3.08108e+06	-0.272425
601822	3.07574e+06	0.151943		610522	3.08108e+06	-0.291052
601838	3.07574e+06	0.145323		610538	3.08108e+06	-0.297236
601852	3.07574e+06	0.0132777		610552	3.08108e+06	-0.292181
601868	3.07574e+06	-0.142086		610568	3.08108e+06	-0.27945
601882	3.07574e+06	-0.154973		610582	3.08108e+06	-0.264552
601402	3.07573e+06	0.259981		610598	3.08108e+06	-0.250689
601418	3.07573e+06	0.304046		610612	3.08108e+06	-0.236978
601432	3.07573e+06	0.348775		610628	3.08108e+06	-0.227598
601448	3.07573e+06	0.380866		610642	3.08108e+06	-0.216348
601462	3.07573e+06	0.400571		610658	3.08108e+06	-0.184392
601478	3.07573e+06	0.399074		610672	3.08108e+06	-0.157618
601492	3.07573e+06	0.36763		610688	3.08108e+06	-0.146571
601508	3.07573e+06	0.320471		610702	3.08108e+06	-0.139682
601522	3.07573e+06	0.309552		610718	3.08108e+06	-0.127838
601538	3.07573e+06	0.306215		610732	3.08108e+06	-0.108451
601552	3.07573e+06	0.292652		610748	3.08108e+06	-0.0840583
601568	3.07573e+06	0.26995		610762	3.08108e+06	-0.0590272
601582	3.07573e+06	0.255714		610778	3.08108e+06	-0.0363976
601598	3.07573e+06	0.248069		610792	3.08108e+06	-0.0162853
601612	3.07573e+06	0.263407		610808	3.08108e+06	-0.00285267
601628	3.07573e+06	0.248218		610822	3.08108e+06	-0.000106
601642	3.07573e+06	0.143027		610838	3.08108e+06	-0.00625817
601658	3.07573e+06	0.108808		614078	3.08108e+06	0.15688
601672	3.07573e+06	0.112564		614092	3.08108e+06	0.343246
601688	3.07573e+06	0.119983		614108	3.08108e+06	0.466825
601702	3.07573e+06	0.12693		614122	3.08108e+06	0.455041
601718	3.07573e+06	0.138262		614138	3.08108e+06	0.447438
601732	3.07573e+06	0.150158		614152	3.08108e+06	0.377654
601748	3.07573e+06	0.152778		614168	3.08108e+06	0.282238
601762	3.07573e+06	0.141379		614182	3.08108e+06	0.168294
601778	3.07573e+06	0.129364		614198	3.08108e+06	0.0127198
601792	3.07573e+06	0.130663		614212	3.08108e+06	-0.110363
601808	3.07573e+06	0.15407		614228	3.08108e+06	-0.0938779
601822	3.07573e+06	0.167774		614242	3.08108e+06	0.0611327
601838	3.07573e+06	0.0873397		614258	3.08108e+06	0.232122
601852	3.07573e+06	-0.076651		614272	3.08108e+06	0.302349
601868	3.07573e+06	-0.130835		614288	3.08108e+06	0.256169
601402	3.07571e+06	0.260823		614302	3.08108e+06	0.140788
601418	3.07571e+06	0.297944		614318	3.08108e+06	0.0350576
601432	3.07571e+06	0.353761		614332	3.08108e+06	-0.00797078
601448	3.07571e+06	0.389388		614348	3.08108e+06	-0.0239521
601462	3.07571e+06	0.400715		614362	3.08108e+06	0.0241327
601478	3.07571e+06	0.394112		614378	3.08108e+06	0.0288529
601492	3.07571e+06	0.373205		614392	3.08108e+06	-0.0417311
601508	3.07571e+06	0.334594		614408	3.08108e+06	-0.0284631
601522	3.07571e+06	0.296606		614422	3.08108e+06	-0.000175778
601538	3.07571e+06	0.267757		614438	3.08108e+06	0.0280101
601552	3.07571e+06	0.237811		614452	3.08108e+06	0.0538397
601568	3.07571e+06	0.223151		614468	3.08108e+06	0.0752257
601582	3.07571e+06	0.222167		614482	3.08108e+06	0.0908902
601598	3.07571e+06	0.23626		614498	3.08108e+06	0.0995407
601612	3.07571e+06	0.254994		614512	3.08108e+06	0.100645
601628	3.07571e+06	0.242438		614528	3.08108e+06	0.0892571
601642	3.07571e+06	0.175243		614542	3.08108e+06	0.0605178
601658	3.07571e+06	0.117568		614558	3.08108e+06	-0.0335656
601672	3.07571e+06	0.121113		614572	3.08108e+06	-0.182677
601688	3.07571e+06	0.125493		610312	3.08107e+06	0.200797
601702	3.07571e+06	0.139551		610328	3.08107e+06	0.225442
601718	3.07571e+06	0.155108		610342	3.08107e+06	0.158962
601732	3.07571e+06	0.168953		610358	3.08107e+06	-0.0123017
601748	3.07571e+06	0.16485		610372	3.08107e+06	-0.110892
601762	3.07571e+06	0.153258		610388	3.08107e+06	-0.110498
601778	3.07571e+06	0.170887		610402	3.08107e+06	-0.136411
601792	3.07571e+06	0.191531		610418	3.08107e+06	-0.174145
601808	3.07571e+06	0.190351		610432	3.08107e+06	-0.204818
601822	3.07571e+06	0.151929		610448	3.08107e+06	-0.228556
601838	3.07571e+06	0.0253624		610462	3.08107e+06	-0.249423
601852	3.07571e+06	-0.0728288		610478	3.08107e+06	-0.274754
601868	3.07571e+06	-0.0993056		610492	3.08107e+06	-0.304589
601402	3.0757e+06	0.256351		610508	3.08107e+06	-0.335449
601418	3.0757e+06	0.276899		610522	3.08107e+06	-0.352291
601432	3.0757e+06	0.314677		610538	3.08107e+06	-0.355747
601448	3.0757e+06	0.354466		610552	3.08107e+06	-0.350325
601462	3.0757e+06	0.372051		610568	3.08107e+06	-0.337683
601478	3.0757e+06	0.372592		610582	3.08107e+06	-0.322601
601492	3.0757e+06	0.359028		610598	3.08107e+06	-0.308829
601508	3.0757e+06	0.326549		610612	3.08107e+06	-0.298031
601522	3.0757e+06	0.280586		610628	3.08107e+06	-0.293431
601538	3.0757e+06	0.23723		610642	3.08107e+06	-0.284964
601552	3.0757e+06	0.207413		610658	3.08107e+06	-0.260796
601568	3.0757e+06	0.190957		610672	3.08107e+06	-0.217474
601582	3.0757e+06	0.195706		610688	3.08107e+06	-0.19273
601598	3.0757e+06	0.227002		610702	3.08107e+06	-0.184026
601612	3.0757e+06	0.255019		610718	3.08107e+06	-0.171084
601628	3.0757e+06	0.239027		610732	3.08107e+06	-0.151022
601642	3.0757e+06	0.182552		610748	3.08107e+06	-0.126474
601658	3.0757e+06	0.135756		610762	3.08107e+06	-0.101798
601672	3.0757e+06	0.130866		610778	3.08107e+06	-0.079604
601688	3.0757e+06	0.141227		610792	3.08107e+06	-0.0583271
601702	3.0757e+06	0.158574		610808	3.08107e+06	-0.0414094
601718	3.0757e+06	0.171215		610822	3.08107e+06	-0.0281258
601732	3.0757e+06	0.178525		610838	3.08107e+06	-0.022035
601748	3.0757e+06	0.167537		610852	3.08107e+06	-0.0208388
601762	3.0757e+06	0.181441		610868	3.08107e+06	-0.012716
601778	3.0757e+06	0.224636		614062	3.08107e+06	-0.105404
601792	3.0757e+06	0.237564		614078	3.08107e+06	0.0347078
601808	3.0757e+06	0.200398		614092	3.08107e+06	0.259442
601822	3.0757e+06	0.139078		614108	3.08107e+06	0.420848
601838	3.0757e+06	0.0263444		614122	3.08107e+06	0.476817
601852	3.0757e+06	-0.0589526		614138	3.08107e+06	0.449532
601868	3.0757e+06	-0.0683234		614152	3.08107e+06	0.390536
601418	3.07568e+06	0.27118		614168	3.08107e+06	0.257205
601432	3.07568e+06	0.263735		614182	3.08107e+06	0.0847743
601448	3.07568e+06	0.295091		614198	3.08107e+06	-0.0483793
601462	3.07568e+06	0.32714		614212	3.08107e+06	-0.1278
601478	3.07568e+06	0.332134		614228	3.08107e+06	-0.072384
601492	3.07568e+06	0.322627		614242	3.08107e+06	0.146582
601508	3.07568e+06	0.297548		614258	3.08107e+06	0.293928
601522	3.07568e+06	0.261168		614272	3.08107e+06	0.326257
601538	3.07568e+06	0.226428		614288	3.08107e+06	0.314831
601552	3.07568e+06	0.203776		614302	3.08107e+06	0.231148
601568	3.07568e+06	0.190915		614318	3.08107e+06	0.126417
601582	3.07568e+06	0.199235		614332	3.08107e+06	0.0481687
601598	3.07568e+06	0.233669		614348	3.08107e+06	0.0181637
601612	3.07568e+06	0.254345		614362	3.08107e+06	0.022498
601628	3.07568e+06	0.224008		614378	3.08107e+06	0.0267559
601642	3.07568e+06	0.181608		614392	3.08107e+06	-0.0439726
601658	3.07568e+06	0.159546		614408	3.08107e+06	-0.0289018
601672	3.07568e+06	0.153099		614422	3.08107e+06	0.00305089
601688	3.07568e+06	0.154028		614438	3.08107e+06	0.0323139
601702	3.07568e+06	0.158813		614452	3.08107e+06	0.0487184
601718	3.07568e+06	0.160292		614468	3.08107e+06	0.0520558
601732	3.07568e+06	0.167579		614482	3.08107e+06	0.0624426
601748	3.07568e+06	0.170031		614498	3.08107e+06	0.0794837
601762	3.07568e+06	0.200196		614512	3.08107e+06	0.0892698
601778	3.07568e+06	0.233121		614528	3.08107e+06	0.0793189
601792	3.07568e+06	0.242102		614542	3.08107e+06	0.0399176
601808	3.07568e+06	0.203263		614558	3.08107e+06	-0.0424536
601822	3.07568e+06	0.137484		614572	3.08107e+06	-0.17459
601838	3.07568e+06	0.0321198		614588	3.08107e+06	-0.265834
601852	3.07568e+06	-0.0419296		610298	3.08105e+06	0.038805
601868	3.07568e+06	-0.0491068		610312	3.08105e+06	0.0655754
601418	3.07567e+06	0.263488		610328	3.08105e+06	0.058028
601432	3.07567e+06	0.24205		610342	3.08105e+06	-0.0131111
601448	3.07567e+06	0.236046		610358	3.08105e+06	-0.164756
601462	3.07567e+06	0.264988		610372	3.08105e+06	-0.209324
601478	3.07567e+06	0.281076		610388	3.08105e+06	-0.200875
601492	3.07567e+06	0.281966		610402	3.08105e+06	-0.214705
601508	3.07567e+06	0.270585		610418	3.08105e+06	-0.248758
601522	3.07567e+06	0.248966		610432	3.08105e+06	-0.274584
601538	3.07567e+06	0.225112		610448	3.08105e+06	-0.291969
601552	3.07567e+06	0.208269		610462	3.08105e+06	-0.310503
601568	3.07567e+06	0.20277		610478	3.08105e+06	-0.32933
601582	3.07567e+06	0.215733		610492	3.08105e+06	-0.353289
601598	3.07567e+06	0.237687		610508	3.08105e+06	-0.383062
601612	3.07567e+06	0.231441		610522	3.08105e+06	-0.396557
601628	3.07567e+06	0.216948		610538	3.08105e+06	-0.390726
601642	3.07567e+06	0.196467		610552	3.08105e+06	-0.381998
601658	3.07567e+06	0.182411		610568	3.08105e+06	-0.372775
601672	3.07567e+06	0.174551		610582	3.08105e+06	-0.362815
601688	3.07567e+06	0.16536		610598	3.08105e+06	-0.353192
601702	3.07567e+06	0.152993		610612	3.08105e+06	-0.347187
601718	3.07567e+06	0.139862		610628	3.08105e+06	-0.345692
601732	3.07567e+06	0.144053		610642	3.08105e+06	-0.338934
601748	3.07567e+06	0.154652		610658	3.08105e+06	-0.32488
601762	3.07567e+06	0.170031		610672	3.08105e+06	-0.288479
601778	3.07567e+06	0.196727		610688	3.08105e+06	-0.253047
601792	3.07567e+06	0.215374		610702	3.08105e+06	-0.240556
601808	3.07567e+06	0.177129		610718	3.08105e+06	-0.226242
601822	3.07567e+06	0.0831704		610732	3.08105e+06	-0.203594
601838	3.07567e+06	-0.00507675		610748	3.08105e+06	-0.176107
601852	3.07567e+06	-0.0746232		610762	3.08105e+06	-0.148385
601868	3.07567e+06	-0.0839816		610778	3.08105e+06	-0.110447
601432	3.07565e+06	0.247304		610792	3.08105e+06	-0.0800332
601448	3.07565e+06	0.207811		610808	3.08105e+06	-0.0665863
601462	3.07565e+06	0.210483		610822	3.08105e+06	-0.0586124
601478	3.07565e+06	0.238934		610838	3.08105e+06	-0.0488372
601492	3.07565e+06	0.255527		610852	3.08105e+06	-0.0339218
601508	3.07565e+06	0.262392		610868	3.08105e+06	-0.00148275
601522	3.07565e+06	0.252617		610882	3.08105e+06	0.038036
601538	3.07565e+06	0.231133		614062	3.08105e+06	-0.179328
601552	3.07565e+06	0.216045		614078	3.08105e+06	-0.0400666
601568	3.07565e+06	0.214196		614092	3.08105e+06	0.184751
601582	3.07565e+06	0.221386		614108	3.08105e+06	0.322731
601598	3.07565e+06	0.222587		614122	3.08105e+06	0.380248
601612	3.07565e+06	0.218156		614138	3.08105e+06	0.411143
601628	3.07565e+06	0.207488		614152	3.08105e+06	0.419201
601642	3.07565e+06	0.193794		614168	3.08105e+06	0.313436
601658	3.07565e+06	0.179971		614182	3.08105e+06	0.0855759
601672	3.07565e+06	0.166144		614198	3.08105e+06	-0.0936512
601688	3.07565e+06	0.15676		614212	3.08105e+06	-0.179381
601702	3.07565e+06	0.148089		614228	3.08105e+06	-0.0902838
601718	3.07565e+06	0.14418		614242	3.08105e+06	0.149852
601732	3.07565e+06	0.15047		614258	3.08105e+06	0.303102
601748	3.07565e+06	0.14453		614272	3.08105e+06	0.361247
601762	3.07565e+06	0.133608		614288	3.08105e+06	0.353267
601778	3.07565e+06	0.150069		614302	3.08105e+06	0.278495
601792	3.07565e+06	0.173038		614318	3.08105e+06	0.172359
601808	3.07565e+06	0.133205		614332	3.08105e+06	0.0802249
601822	3.07565e+06	0.0083228		614348	3.08105e+06	0.0356199
601838	3.07565e+06	-0.0399824		614362	3.08105e+06	0.0167097
601852	3.07565e+06	-0.120155		614378	3.08105e+06	0.0572214
601868	3.07565e+06	-0.142936		614392	3.08105e+06	-0.0274827
601432	3.07564e+06	0.248686		614408	3.08105e+06	-0.0136064
601448	3.07564e+06	0.20507		614422	3.08105e+06	0.0215694
601462	3.07564e+06	0.191224		614438	3.08105e+06	0.0385757
601478	3.07564e+06	0.215695		614452	3.08105e+06	0.0351811
601492	3.07564e+06	0.246797		614468	3.08105e+06	0.0348738
601508	3.07564e+06	0.263282		614482	3.08105e+06	0.054066
601522	3.07564e+06	0.256917		614498	3.08105e+06	0.0792651
601538	3.07564e+06	0.238307		614512	3.08105e+06	0.0892682
601552	3.07564e+06	0.221782		614528	3.08105e+06	0.0616757
601568	3.07564e+06	0.215782		614542	3.08105e+06	-0.0137336
601582	3.07564e+06	0.216016		614558	3.08105e+06	-0.0992652
601598	3.07564e+06	0.21603		614572	3.08105e+06	-0.176549
601612	3.07564e+06	0.21288		614588	3.08105e+06	-0.249922
601628	3.07564e+06	0.203648		610298	3.08104e+06	-0.030406
601642	3.07564e+06	0.188733		610312	3.08104e+06	-0.0365893
601658	3.07564e+06	0.168303		610328	3.08104e+06	-0.107406
601672	3.07564e+06	0.157771		610342	3.08104e+06	-0.191626
601688	3.07564e+06	0.152832		610358	3.08104e+06	-0.2581
601702	3.07564e+06	0.157014		610372	3.08104e+06	-0.289228
601718	3.07564e+06	0.163499		610388	3.08104e+06	-0.287936
601732	3.07564e+06	0.155563		610402	3.08104e+06	-0.298929
601748	3.07564e+06	0.131034		610418	3.08104e+06	-0.330939
601762	3.07564e+06	0.110288		610432	3.08104e+06	-0.347397
601778	3.07564e+06	0.108504		610448	3.08104e+06	-0.357597
601792	3.07564e+06	0.121932		610462	3.08104e+06	-0.366593
601808	3.07564e+06	0.0713296		610478	3.08104e+06	-0.370446
601822	3.07564e+06	-0.0290685		610492	3.08104e+06	-0.388174
601838	3.07564e+06	-0.0879847		610508	3.08104e+06	-0.41221
601852	3.07564e+06	-0.161944		610522	3.08104e+06	-0.415074
601868	3.07564e+06	-0.186883		610538	3.08104e+06	-0.394762
601432	3.07562e+06	0.203933		610552	3.08104e+06	-0.376283
601448	3.07562e+06	0.173803		610568	3.08104e+06	-0.371209
601462	3.07562e+06	0.164847		610582	3.08104e+06	-0.379088
601478	3.07562e+06	0.192816		610598	3.08104e+06	-0.387707
601492	3.07562e+06	0.239057		610612	3.08104e+06	-0.388326
601508	3.07562e+06	0.264787		610628	3.08104e+06	-0.389413
601522	3.07562e+06	0.272381		610642	3.08104e+06	-0.381784
601538	3.07562e+06	0.257448		610658	3.08104e+06	-0.371599
601552	3.07562e+06	0.234686		610672	3.08104e+06	-0.353067
601568	3.07562e+06	0.221606		610688	3.08104e+06	-0.316917
601582	3.07562e+06	0.221196		610702	3.08104e+06	-0.289881
601598	3.07562e+06	0.229142		610718	3.08104e+06	-0.27437
601612	3.07562e+06	0.230824		610732	3.08104e+06	-0.252716
601628	3.07562e+06	0.216471		610748	3.08104e+06	-0.225786
601642	3.07562e+06	0.187225		610762	3.08104e+06	-0.179536
601658	3.07562e+06	0.148067		610778	3.08104e+06	-0.120018
601672	3.07562e+06	0.141387		610792	3.08104e+06	-0.0834881
601688	3.07562e+06	0.153014		610808	3.08104e+06	-0.0687152
601702	3.07562e+06	0.166675		610822	3.08104e+06	-0.0662758
601718	3.07562e+06	0.1697		610838	3.08104e+06	-0.0687295
601732	3.07562e+06	0.136025		610852	3.08104e+06	-0.0574764
601748	3.07562e+06	0.0932448		610868	3.08104e+06	-0.0155771
601762	3.07562e+06	0.0871353		610882	3.08104e+06	0.0497651
601778	3.07562e+06	0.0954024		610898	3.08104e+06	0.102474
601792	3.07562e+06	0.0882615		614062	3.08104e+06	-0.212836
601808	3.07562e+06	0.0375119		614078	3.08104e+06	-0.0650103
601822	3.07562e+06	-0.0400918		614092	3.08104e+06	0.131027
601838	3.07562e+06	-0.0979702		614108	3.08104e+06	0.209999
601852	3.07562e+06	-0.161581		614122	3.08104e+06	0.268273
601868	3.07562e+06	-0.195085		614138	3.08104e+06	0.335164
601432	3.07561e+06	0.208949		614152	3.08104e+06	0.382277
601448	3.07561e+06	0.195753		614168	3.08104e+06	0.357192
601462	3.07561e+06	0.177296		614182	3.08104e+06	0.160609
601478	3.07561e+06	0.205292		614198	3.08104e+06	-0.120959
601492	3.07561e+06	0.233553		614212	3.08104e+06	-0.264441
601508	3.07561e+06	0.263043		614228	3.08104e+06	-0.217067
601522	3.07561e+06	0.284562		614242	3.08104e+06	0.0291907
601538	3.07561e+06	0.286611		614258	3.08104e+06	0.293458
601552	3.07561e+06	0.266154		614272	3.08104e+06	0.38914
601568	3.07561e+06	0.248573		614288	3.08104e+06	0.356614
601582	3.07561e+06	0.243645		614302	3.08104e+06	0.288352
601598	3.07561e+06	0.243165		614318	3.08104e+06	0.182774
601612	3.07561e+06	0.23754		614332	3.08104e+06	0.0845891
601628	3.07561e+06	0.215824		614348	3.08104e+06	0.0361331
601642	3.07561e+06	0.169708		614362	3.08104e+06	0.013966
601658	3.07561e+06	0.133302		614378	3.08104e+06	0.00951522
601672	3.07561e+06	0.133521		614392	3.08104e+06	-0.00971955
601688	3.07561e+06	0.160958		614408	3.08104e+06	0.00843311
601702	3.07561e+06	0.165693		614422	3.08104e+06	0.0330871
601718	3.07561e+06	0.159887		614438	3.08104e+06	0.0379753
601732	3.07561e+06	0.122394		614452	3.08104e+06	0.0345158
601748	3.07561e+06	0.0829549		614468	3.08104e+06	0.0368224
601762	3.07561e+06	0.082052		614482	3.08104e+06	0.0591412
601778	3.07561e+06	0.0941937		614498	3.08104e+06	0.0836845
601792	3.07561e+06	0.0972669		614512	3.08104e+06	0.0786632
601808	3.07561e+06	0.0654466		614528	3.08104e+06	0.0123601
601822	3.07561e+06	-0.00868353		614542	3.08104e+06	-0.0807397
601838	3.07561e+06	-0.0753155		614558	3.08104e+06	-0.156178
601852	3.07561e+06	-0.109393		614572	3.08104e+06	-0.209139
601868	3.07561e+06	-0.123645		614588	3.08104e+06	-0.270185
601448	3.07559e+06	0.17757		614602	3.08104e+06	-0.339786
601462	3.07559e+06	0.229773		610282	3.08102e+06	-0.15384
601478	3.07559e+06	0.257276		610298	3.08102e+06	-0.122313
601492	3.07559e+06	0.236089		610312	3.08102e+06	-0.132825
601508	3.07559e+06	0.256433		610328	3.08102e+06	-0.194539
601522	3.07559e+06	0.278009		610342	3.08102e+06	-0.282588
601538	3.07559e+06	0.296299		610358	3.08102e+06	-0.329661
601552	3.07559e+06	0.291179		610372	3.08102e+06	-0.354752
601568	3.07559e+06	0.277523		610388	3.08102e+06	-0.369135
601582	3.07559e+06	0.269463		610402	3.08102e+06	-0.388011
601598	3.07559e+06	0.253464		610418	3.08102e+06	-0.408466
601612	3.07559e+06	0.229812		610432	3.08102e+06	-0.417849
601628	3.07559e+06	0.206116		610448	3.08102e+06	-0.420704
601642	3.07559e+06	0.164429		610462	3.08102e+06	-0.409307
601658	3.07559e+06	0.129154		610478	3.08102e+06	-0.401013
601672	3.07559e+06	0.133431		610492	3.08102e+06	-0.411898
601688	3.07559e+06	0.158168		610508	3.08102e+06	-0.424092
601702	3.07559e+06	0.161115		610522	3.08102e+06	-0.412958
601718	3.07559e+06	0.142187		610538	3.08102e+06	-0.387339
601732	3.07559e+06	0.11059		610552	3.08102e+06	-0.366427
601748	3.07559e+06	0.0879764		610568	3.08102e+06	-0.363829
601762	3.07559e+06	0.0893971		610582	3.08102e+06	-0.396714
601778	3.07559e+06	0.0981586		610598	3.08102e+06	-0.420457
601792	3.07559e+06	0.0944314		610612	3.08102e+06	-0.42522
601808	3.07559e+06	0.0889253		610628	3.08102e+06	-0.421849
601822	3.07559e+06	0.0263507		610642	3.08102e+06	-0.414247
601838	3.07559e+06	-0.0693881		610658	3.08102e+06	-0.403081
601852	3.07559e+06	-0.106873		610672	3.08102e+06	-0.385633
601868	3.07559e+06	-0.112081		610688	3.08102e+06	-0.359416
601448	3.07558e+06	0.144099		610702	3.08102e+06	-0.329964
601462	3.07558e+06	0.233135		610718	3.08102e+06	-0.310062
601478	3.07558e+06	0.279232		610732	3.08102e+06	-0.291829
601492	3.07558e+06	0.242934		610748	3.08102e+06	-0.255487
601508	3.07558e+06	0.252484		610762	3.08102e+06	-0.191412
601522	3.07558e+06	0.264399		610778	3.08102e+06	-0.129985
601538	3.07558e+06	0.284865		610792	3.08102e+06	-0.0940235
601552	3.07558e+06	0.293067		610808	3.08102e+06	-0.0765929
601568	3.07558e+06	0.285998		610822	3.08102e+06	-0.0751418
601582	3.07558e+06	0.273327		610838	3.08102e+06	-0.0833899
601598	3.07558e+06	0.244415		610852	3.08102e+06	-0.0791114
601612	3.07558e+06	0.216978		610868	3.08102e+06	-0.042981
601628	3.07558e+06	0.194415		610882	3.08102e+06	0.0278946
601642	3.07558e+06	0.158412		610898	3.08102e+06	0.105012
601658	3.07558e+06	0.127752		614048	3.08102e+06	-0.192461
601672	3.07558e+06	0.143541		614062	3.08102e+06	-0.247616
601688	3.07558e+06	0.161718		614078	3.08102e+06	-0.154737
601702	3.07558e+06	0.155594		614092	3.08102e+06	-0.00736244
601718	3.07558e+06	0.131378		614108	3.08102e+06	0.0395976
601732	3.07558e+06	0.110926		614122	3.08102e+06	0.0991292
601748	3.07558e+06	0.102393		614138	3.08102e+06	0.220208
601762	3.07558e+06	0.106415		614152	3.08102e+06	0.320472
601778	3.07558e+06	0.105315		614168	3.08102e+06	0.326623
601792	3.07558e+06	0.0898407		614182	3.08102e+06	0.162635
601808	3.07558e+06	0.050496		614198	3.08102e+06	-0.117958
601822	3.07558e+06	-0.0153491		614212	3.08102e+06	-0.275864
601838	3.07558e+06	-0.11812		614228	3.08102e+06	-0.235798
601852	3.07558e+06	-0.217762		614242	3.08102e+06	-0.046837
601868	3.07558e+06	-0.234253		614258	3.08102e+06	0.267849
601462	3.07556e+06	0.181581		614272	3.08102e+06	0.399627
601478	3.07556e+06	0.228964		614288	3.08102e+06	0.348707
601492	3.07556e+06	0.229523		614302	3.08102e+06	0.240098
601508	3.07556e+06	0.248981		614318	3.08102e+06	0.138282
601522	3.07556e+06	0.255494		614332	3.08102e+06	0.057196
601538	3.07556e+06	0.271526		614348	3.08102e+06	0.0138522
601552	3.07556e+06	0.284791		614362	3.08102e+06	0.00535378
601568	3.07556e+06	0.27889		614378	3.08102e+06	0.0116407
601582	3.07556e+06	0.256091		614392	3.08102e+06	0.000302778
601598	3.07556e+06	0.223664		614408	3.08102e+06	0.0148942
601612	3.07556e+06	0.200049		614422	3.08102e+06	0.0335701
601628	3.07556e+06	0.172466		614438	3.08102e+06	0.0417359
601642	3.07556e+06	0.145331		614452	3.08102e+06	0.0409929
601658	3.07556e+06	0.128555		614468	3.08102e+06	0.0440312
601672	3.07556e+06	0.145059		614482	3.08102e+06	0.0643006
601688	3.07556e+06	0.154218		614498	3.08102e+06	0.0781309
601702	3.07556e+06	0.142952		614512	3.08102e+06	0.0364769
601718	3.07556e+06	0.1335		614528	3.08102e+06	-0.0489798
601732	3.07556e+06	0.13715		614542	3.08102e+06	-0.128624
601748	3.07556e+06	0.135776		614558	3.08102e+06	-0.211311
601762	3.07556e+06	0.131057		614572	3.08102e+06	-0.306439
601778	3.07556e+06	0.111935		614588	3.08102e+06	-0.374135
601792	3.07556e+06	0.0683264		614602	3.08102e+06	-0.397397
601808	3.07556e+06	0.00266003		610282	3.08101e+06	-0.208467
601822	3.07556e+06	-0.101264		610298	3.08101e+06	-0.195882
601838	3.07556e+06	-0.15133		610312	3.08101e+06	-0.20177
601852	3.07556e+06	-0.273421		610328	3.08101e+06	-0.23442
601868	3.07556e+06	-0.350029		610342	3.08101e+06	-0.310191
601462	3.07555e+06	0.171725		610358	3.08101e+06	-0.379086
601478	3.07555e+06	0.162668		610372	3.08101e+06	-0.408771
601492	3.07555e+06	0.2075		610388	3.08101e+06	-0.431521
601508	3.07555e+06	0.237832		610402	3.08101e+06	-0.453875
601522	3.07555e+06	0.251176		610418	3.08101e+06	-0.471048
601538	3.07555e+06	0.264293		610432	3.08101e+06	-0.477728
601552	3.07555e+06	0.276674		610448	3.08101e+06	-0.461424
601568	3.07555e+06	0.270064		610462	3.08101e+06	-0.434727
601582	3.07555e+06	0.231928		610478	3.08101e+06	-0.420058
601598	3.07555e+06	0.203122		610492	3.08101e+06	-0.426836
601612	3.07555e+06	0.181007		610508	3.08101e+06	-0.429894
601628	3.07555e+06	0.151845		610522	3.08101e+06	-0.413618
601642	3.07555e+06	0.131691		610538	3.08101e+06	-0.388824
601658	3.07555e+06	0.126451		610552	3.08101e+06	-0.370019
601672	3.07555e+06	0.136627		610568	3.08101e+06	-0.375492
601688	3.07555e+06	0.146709		610582	3.08101e+06	-0.422312
601702	3.07555e+06	0.180537		610598	3.08101e+06	-0.445624
601718	3.07555e+06	0.163782		610612	3.08101e+06	-0.446791
601732	3.07555e+06	0.164883		610628	3.08101e+06	-0.443123
601748	3.07555e+06	0.163583		610642	3.08101e+06	-0.436432
601762	3.07555e+06	0.147563		610658	3.08101e+06	-0.425155
601778	3.07555e+06	0.126242		610672	3.08101e+06	-0.408659
601792	3.07555e+06	0.0809541		610688	3.08101e+06	-0.385931
601808	3.07555e+06	-0.0156089		610702	3.08101e+06	-0.357165
601822	3.07555e+06	-0.0905128		610718	3.08101e+06	-0.335668
601838	3.07555e+06	-0.115471		610732	3.08101e+06	-0.314855
601852	3.07555e+06	-0.206857		610748	3.08101e+06	-0.270041
601478	3.07553e+06	0.166664		610762	3.08101e+06	-0.206948
601492	3.07553e+06	0.192477		610778	3.08101e+06	-0.15385
601508	3.07553e+06	0.218638		610792	3.08101e+06	-0.12439
601522	3.07553e+06	0.242896		610808	3.08101e+06	-0.107643
601538	3.07553e+06	0.264339		610822	3.08101e+06	-0.10698
601552	3.07553e+06	0.274211		610838	3.08101e+06	-0.117854
601568	3.07553e+06	0.266742		610852	3.08101e+06	-0.11773
601582	3.07553e+06	0.220743		610868	3.08101e+06	-0.085107
601598	3.07553e+06	0.191162		610882	3.08101e+06	-0.0144036
601612	3.07553e+06	0.171785		610898	3.08101e+06	0.0570037
601628	3.07553e+06	0.146328		614048	3.08101e+06	-0.157255
601642	3.07553e+06	0.128491		614062	3.08101e+06	-0.214433
601658	3.07553e+06	0.123129		614078	3.08101e+06	-0.174873
601672	3.07553e+06	0.131859		614092	3.08101e+06	-0.153845
601688	3.07553e+06	0.15021		614108	3.08101e+06	-0.185399
601702	3.07553e+06	0.228158		614122	3.08101e+06	-0.117646
601718	3.07553e+06	0.188504		614138	3.08101e+06	0.0588993
601732	3.07553e+06	0.175569		614152	3.08101e+06	0.216407
601748	3.07553e+06	0.186355		614168	3.08101e+06	0.249467
601762	3.07553e+06	0.176141		614182	3.08101e+06	0.16268
601778	3.07553e+06	0.138427		614198	3.08101e+06	-0.0539412
601792	3.07553e+06	0.10481		614212	3.08101e+06	-0.190517
601808	3.07553e+06	0.0293336		614228	3.08101e+06	-0.158828
601822	3.07553e+06	-0.00425919		614242	3.08101e+06	0.00319011
601838	3.07553e+06	-0.0421555		614258	3.08101e+06	0.216147
601852	3.07553e+06	-0.108289		614272	3.08101e+06	0.34384
601492	3.07552e+06	0.189557		614288	3.08101e+06	0.358679
601508	3.07552e+06	0.198481		614302	3.08101e+06	0.218094
601522	3.07552e+06	0.231913		614318	3.08101e+06	0.0759814
601538	3.07552e+06	0.261754		614332	3.08101e+06	0.0260428
601552	3.07552e+06	0.274594		614348	3.08101e+06	-0.0138489
601568	3.07552e+06	0.266191		614362	3.08101e+06	0.00230167
601582	3.07552e+06	0.220651		614378	3.08101e+06	0.0473053
601598	3.07552e+06	0.184792		614392	3.08101e+06	0.0204432
601612	3.07552e+06	0.170066		614408	3.08101e+06	0.0142039
601628	3.07552e+06	0.149743		614422	3.08101e+06	0.0299396
601642	3.07552e+06	0.130551		614438	3.08101e+06	0.0422332
601658	3.07552e+06	0.119722		614452	3.08101e+06	0.0443749
601672	3.07552e+06	0.114024		614468	3.08101e+06	0.0470233
601688	3.07552e+06	0.136301		614482	3.08101e+06	0.0610486
601702	3.07552e+06	0.24444		614498	3.08101e+06	0.047334
601718	3.07552e+06	0.193024		614512	3.08101e+06	-0.0146711
601732	3.07552e+06	0.189902		614528	3.08101e+06	-0.101808
601748	3.07552e+06	0.20844		614542	3.08101e+06	-0.226868
601762	3.07552e+06	0.195251		614558	3.08101e+06	-0.366706
601778	3.07552e+06	0.158275		614572	3.08101e+06	-0.473115
601792	3.07552e+06	0.108213		614588	3.08101e+06	-0.51166
601808	3.07552e+06	0.0606578		614602	3.08101e+06	-0.488181
601822	3.07552e+06	0.000598912		610268	3.08099e+06	-0.251636
601838	3.07552e+06	-0.0391223		610282	3.08099e+06	-0.255621
601852	3.07552e+06	-0.0935572		610298	3.08099e+06	-0.249188
601492	3.0755e+06	0.194222		610312	3.08099e+06	-0.251585
601508	3.0755e+06	0.184155		610328	3.08099e+06	-0.275502
601522	3.0755e+06	0.216252		610342	3.08099e+06	-0.322107
601538	3.0755e+06	0.251657		610358	3.08099e+06	-0.400162
601552	3.0755e+06	0.267604		610372	3.08099e+06	-0.444113
601568	3.0755e+06	0.261245		610388	3.08099e+06	-0.47744
601582	3.0755e+06	0.225983		610402	3.08099e+06	-0.496695
601598	3.0755e+06	0.182292		610418	3.08099e+06	-0.505146
601612	3.0755e+06	0.164172		610432	3.08099e+06	-0.495526
601628	3.0755e+06	0.146427		610448	3.08099e+06	-0.468978
601642	3.0755e+06	0.128632		610462	3.08099e+06	-0.44321
601658	3.0755e+06	0.113746		610478	3.08099e+06	-0.431746
601672	3.0755e+06	0.101352		610492	3.08099e+06	-0.435735
601688	3.0755e+06	0.113809		610508	3.08099e+06	-0.435771
601702	3.0755e+06	0.223043		610522	3.08099e+06	-0.418678
601718	3.0755e+06	0.21712		610538	3.08099e+06	-0.396107
601732	3.0755e+06	0.198973		610552	3.08099e+06	-0.390018
601748	3.0755e+06	0.183515		610568	3.08099e+06	-0.412863
601762	3.0755e+06	0.201384		610582	3.08099e+06	-0.446049
601778	3.0755e+06	0.19919		610598	3.08099e+06	-0.455472
601792	3.0755e+06	0.141145		610612	3.08099e+06	-0.455944
601808	3.0755e+06	0.0902241		610628	3.08099e+06	-0.454769
601822	3.0755e+06	0.0180821		610642	3.08099e+06	-0.44925
601838	3.0755e+06	-0.0375526		610658	3.08099e+06	-0.438152
601852	3.0755e+06	-0.0735131		610672	3.08099e+06	-0.422494
601508	3.07549e+06	0.173256		610688	3.08099e+06	-0.403555
601522	3.07549e+06	0.193231		610702	3.08099e+06	-0.376599
601538	3.07549e+06	0.230068		610718	3.08099e+06	-0.346184
601552	3.07549e+06	0.247649		610732	3.08099e+06	-0.319284
601568	3.07549e+06	0.242851		610748	3.08099e+06	-0.270617
601582	3.07549e+06	0.223491		610762	3.08099e+06	-0.213912
601598	3.07549e+06	0.184619		610778	3.08099e+06	-0.175093
601612	3.07549e+06	0.164191		610792	3.08099e+06	-0.151176
601628	3.07549e+06	0.141094		610808	3.08099e+06	-0.145217
601642	3.07549e+06	0.1215		610822	3.08099e+06	-0.151504
601658	3.07549e+06	0.105432		610838	3.08099e+06	-0.167495
601672	3.07549e+06	0.0920964		610852	3.08099e+06	-0.173908
601688	3.07549e+06	0.104264		610868	3.08099e+06	-0.151317
601702	3.07549e+06	0.220353		610882	3.08099e+06	-0.0869349
601718	3.07549e+06	0.221012		610898	3.08099e+06	-0.0192837
601732	3.07549e+06	0.178395		614048	3.08099e+06	-0.121373
601748	3.07549e+06	0.127611		614062	3.08099e+06	-0.198637
601762	3.07549e+06	0.150695		614078	3.08099e+06	-0.242352
601778	3.07549e+06	0.185189		614092	3.08099e+06	-0.247145
601792	3.07549e+06	0.17035		614108	3.08099e+06	-0.216266
601808	3.07549e+06	0.123877		614122	3.08099e+06	-0.153889
601822	3.07549e+06	0.0536216		614138	3.08099e+06	-0.020293
601838	3.07549e+06	-0.0236418		614152	3.08099e+06	0.128526
601852	3.07549e+06	-0.0663604		614168	3.08099e+06	0.195868
601508	3.07547e+06	0.155187		614182	3.08099e+06	0.172486
601522	3.07547e+06	0.171417		614198	3.08099e+06	0.0559498
601538	3.07547e+06	0.204773		614212	3.08099e+06	-0.06827
601552	3.07547e+06	0.221415		614228	3.08099e+06	-0.0621289
601568	3.07547e+06	0.218125		614242	3.08099e+06	0.0848917
601582	3.07547e+06	0.206087		614258	3.08099e+06	0.220809
601598	3.07547e+06	0.185434		614272	3.08099e+06	0.284899
601612	3.07547e+06	0.168224		614288	3.08099e+06	0.348541
601628	3.07547e+06	0.14302		614302	3.08099e+06	0.233242
601642	3.07547e+06	0.115314		614318	3.08099e+06	0.079653
601658	3.07547e+06	0.0966758		614332	3.08099e+06	0.00504978
601672	3.07547e+06	0.081295		614348	3.08099e+06	-0.0316614
601688	3.07547e+06	0.0952423		614362	3.08099e+06	-0.0352557
601702	3.07547e+06	0.222208		614378	3.08099e+06	-0.00790444
601718	3.07547e+06	0.229791		614392	3.08099e+06	0.00987933
601732	3.07547e+06	0.152905		614408	3.08099e+06	0.0105032
601748	3.07547e+06	0.107747		614422	3.08099e+06	0.0231171
601762	3.07547e+06	0.129474		614438	3.08099e+06	0.0340914
601778	3.07547e+06	0.159672		614452	3.08099e+06	0.0388211
601792	3.07547e+06	0.139641		614468	3.08099e+06	0.0415712
601808	3.07547e+06	0.111374		614482	3.08099e+06	0.0421383
601822	3.07547e+06	0.0567978		614498	3.08099e+06	0.00495789
601838	3.07547e+06	-0.0518671		614512	3.08099e+06	-0.0956537
601852	3.07547e+06	-0.0764258		614528	3.08099e+06	-0.2477
601508	3.07546e+06	0.15466		614542	3.08099e+06	-0.408374
601522	3.07546e+06	0.145525		614558	3.08099e+06	-0.533578
601538	3.07546e+06	0.178032		614572	3.08099e+06	-0.593642
601552	3.07546e+06	0.197587		614588	3.08099e+06	-0.571606
601568	3.07546e+06	0.198104		614602	3.08099e+06	-0.488982
601582	3.07546e+06	0.194554		610252	3.08098e+06	-0.29547
601598	3.07546e+06	0.186795		610268	3.08098e+06	-0.285119
601612	3.07546e+06	0.169461		610282	3.08098e+06	-0.283002
601628	3.07546e+06	0.145273		610298	3.08098e+06	-0.290155
601642	3.07546e+06	0.11229		610312	3.08098e+06	-0.300242
601658	3.07546e+06	0.0906487		610328	3.08098e+06	-0.328316
601672	3.07546e+06	0.0717843		610342	3.08098e+06	-0.365502
601688	3.07546e+06	0.077021		610358	3.08098e+06	-0.415049
601702	3.07546e+06	0.185883		610372	3.08098e+06	-0.466435
601718	3.07546e+06	0.220578		610388	3.08098e+06	-0.502905
601732	3.07546e+06	0.139627		610402	3.08098e+06	-0.521162
601748	3.07546e+06	0.0935853		610418	3.08098e+06	-0.515404
601762	3.07546e+06	0.105147		610432	3.08098e+06	-0.495992
601778	3.07546e+06	0.131683		610448	3.08098e+06	-0.475681
601792	3.07546e+06	0.104786		610462	3.08098e+06	-0.456419
601808	3.07546e+06	0.100953		610478	3.08098e+06	-0.443772
601822	3.07546e+06	0.026384		610492	3.08098e+06	-0.442156
601838	3.07546e+06	-0.0782222		610508	3.08098e+06	-0.439543
601852	3.07546e+06	-0.0802654		610522	3.08098e+06	-0.424748
601508	3.07544e+06	0.168465		610538	3.08098e+06	-0.42068
601522	3.07544e+06	0.127826		610552	3.08098e+06	-0.440482
601538	3.07544e+06	0.134272		610568	3.08098e+06	-0.455786
601552	3.07544e+06	0.175244		610582	3.08098e+06	-0.457745
601568	3.07544e+06	0.192121		610598	3.08098e+06	-0.454376
601582	3.07544e+06	0.200857		610612	3.08098e+06	-0.452323
601598	3.07544e+06	0.18721		610628	3.08098e+06	-0.448501
601612	3.07544e+06	0.170633		610642	3.08098e+06	-0.440973
601628	3.07544e+06	0.148533		610658	3.08098e+06	-0.431623
601642	3.07544e+06	0.117789		610672	3.08098e+06	-0.42212
601658	3.07544e+06	0.0938373		610688	3.08098e+06	-0.402876
601672	3.07544e+06	0.0784816		610702	3.08098e+06	-0.37151
601688	3.07544e+06	0.0900278		610718	3.08098e+06	-0.33658
601702	3.07544e+06	0.187053		610732	3.08098e+06	-0.299854
601718	3.07544e+06	0.211864		610748	3.08098e+06	-0.252971
601732	3.07544e+06	0.143872		610762	3.08098e+06	-0.21088
601748	3.07544e+06	0.0934874		610778	3.08098e+06	-0.165497
601762	3.07544e+06	0.104273		610792	3.08098e+06	-0.139576
601778	3.07544e+06	0.111659		610808	3.08098e+06	-0.151548
601792	3.07544e+06	0.0968123		610822	3.08098e+06	-0.194048
601808	3.07544e+06	0.0906724		610838	3.08098e+06	-0.231018
601822	3.07544e+06	0.0311584		610852	3.08098e+06	-0.234297
601838	3.07544e+06	-0.049263		610868	3.08098e+06	-0.21984
601852	3.07544e+06	-0.0595608		610882	3.08098e+06	-0.170896
601508	3.07543e+06	0.133655		610898	3.08098e+06	-0.113986
601522	3.07543e+06	0.104615		614032	3.08098e+06	-0.179045
601538	3.07543e+06	0.100593		614048	3.08098e+06	-0.145719
601552	3.07543e+06	0.1507		614062	3.08098e+06	-0.202892
601568	3.07543e+06	0.181073		614078	3.08098e+06	-0.243166
601582	3.07543e+06	0.202753		614092	3.08098e+06	-0.201691
601598	3.07543e+06	0.195957		614108	3.08098e+06	-0.151811
601612	3.07543e+06	0.18443		614122	3.08098e+06	-0.121101
601628	3.07543e+06	0.156584		614138	3.08098e+06	-0.0664027
601642	3.07543e+06	0.12158		614152	3.08098e+06	0.046702
601658	3.07543e+06	0.0992311		614168	3.08098e+06	0.160279
601672	3.07543e+06	0.0911605		614182	3.08098e+06	0.189766
601688	3.07543e+06	0.13449		614198	3.08098e+06	0.113777
601702	3.07543e+06	0.201498		614212	3.08098e+06	0.017212
601718	3.07543e+06	0.19278		614228	3.08098e+06	0.0285158
601732	3.07543e+06	0.129271		614242	3.08098e+06	0.174414
601748	3.07543e+06	0.0939688		614258	3.08098e+06	0.264191
601762	3.07543e+06	0.115185		614272	3.08098e+06	0.300214
601778	3.07543e+06	0.118156		614288	3.08098e+06	0.339406
601792	3.07543e+06	0.0981586		614302	3.08098e+06	0.230037
601808	3.07543e+06	0.0865427		614318	3.08098e+06	0.0736148
601822	3.07543e+06	0.0817068		614332	3.08098e+06	-0.00800078
601838	3.07543e+06	0.00516736		614348	3.08098e+06	-0.0460366
601852	3.07543e+06	-0.0463981		614362	3.08098e+06	-0.102194
601508	3.07541e+06	0.150466		614378	3.08098e+06	-0.107485
601522	3.07541e+06	0.0964224		614392	3.08098e+06	-0.0460271
601538	3.07541e+06	0.0960803		614408	3.08098e+06	-0.0315886
601552	3.07541e+06	0.138972		614422	3.08098e+06	-0.00761756
601568	3.07541e+06	0.161249		614438	3.08098e+06	0.0132723
601582	3.07541e+06	0.181988		614452	3.08098e+06	0.0237443
601598	3.07541e+06	0.195205		614468	3.08098e+06	0.0266479
601612	3.07541e+06	0.189486		614482	3.08098e+06	0.00183911
601628	3.07541e+06	0.165048		614498	3.08098e+06	-0.0871632
601642	3.07541e+06	0.130291		614512	3.08098e+06	-0.218615
601658	3.07541e+06	0.104292		614528	3.08098e+06	-0.359853
601672	3.07541e+06	0.0991296		614542	3.08098e+06	-0.479223
601688	3.07541e+06	0.157123		614558	3.08098e+06	-0.550117
601702	3.07541e+06	0.207321		614572	3.08098e+06	-0.556778
601718	3.07541e+06	0.193965		614588	3.08098e+06	-0.491058
601732	3.07541e+06	0.13129		614602	3.08098e+06	-0.381947
601748	3.07541e+06	0.101043		610252	3.08096e+06	-0.334563
601762	3.07541e+06	0.1076		610268	3.08096e+06	-0.319626
601778	3.07541e+06	0.123063		610282	3.08096e+06	-0.30696
601792	3.07541e+06	0.105949		610298	3.08096e+06	-0.313463
601808	3.07541e+06	0.0951934		610312	3.08096e+06	-0.337204
601822	3.07541e+06	0.0866711		610328	3.08096e+06	-0.372006
601838	3.07541e+06	0.00400614		610342	3.08096e+06	-0.416365
601852	3.07541e+06	-0.0447348		610358	3.08096e+06	-0.46011
601508	3.0754e+06	0.192922		610372	3.08096e+06	-0.497335
601522	3.0754e+06	0.137101		610388	3.08096e+06	-0.528384
601538	3.0754e+06	0.107251		610402	3.08096e+06	-0.538992
601552	3.0754e+06	0.135661		610418	3.08096e+06	-0.525194
601568	3.0754e+06	0.151628		610432	3.08096e+06	-0.50699
601582	3.0754e+06	0.175395		610448	3.08096e+06	-0.489385
601598	3.0754e+06	0.189574		610462	3.08096e+06	-0.46932
601612	3.0754e+06	0.187172		610478	3.08096e+06	-0.454266
601628	3.0754e+06	0.167744		610492	3.08096e+06	-0.447492
601642	3.0754e+06	0.135406		610508	3.08096e+06	-0.442373
601658	3.0754e+06	0.111452		610522	3.08096e+06	-0.43727
601672	3.0754e+06	0.108396		610538	3.08096e+06	-0.443758
601688	3.0754e+06	0.170418		610552	3.08096e+06	-0.452634
601702	3.0754e+06	0.226213		610568	3.08096e+06	-0.457083
601718	3.0754e+06	0.207918		610582	3.08096e+06	-0.451431
601732	3.0754e+06	0.168659		610598	3.08096e+06	-0.441217
601748	3.0754e+06	0.141017		610612	3.08096e+06	-0.435112
601762	3.0754e+06	0.132646		610628	3.08096e+06	-0.432043
601778	3.0754e+06	0.116915		610642	3.08096e+06	-0.430202
601792	3.0754e+06	0.112527		610658	3.08096e+06	-0.4243
601808	3.0754e+06	0.0874329		610672	3.08096e+06	-0.406048
601822	3.0754e+06	0.012644		610688	3.08096e+06	-0.380506
601838	3.0754e+06	-0.0472708		610702	3.08096e+06	-0.353704
601852	3.0754e+06	-0.0466978		610718	3.08096e+06	-0.323976
601508	3.07538e+06	0.233262		610732	3.08096e+06	-0.284047
601522	3.07538e+06	0.183602		610748	3.08096e+06	-0.238637
601538	3.07538e+06	0.121198		610762	3.08096e+06	-0.177344
601552	3.07538e+06	0.12695		610778	3.08096e+06	-0.123514
601568	3.07538e+06	0.142781		610792	3.08096e+06	-0.102709
601582	3.07538e+06	0.164238		610808	3.08096e+06	-0.120634
601598	3.07538e+06	0.180229		610822	3.08096e+06	-0.191883
601612	3.07538e+06	0.183622		610838	3.08096e+06	-0.278329
601628	3.07538e+06	0.185829		610852	3.08096e+06	-0.305866
601642	3.07538e+06	0.152791		610868	3.08096e+06	-0.277882
601658	3.07538e+06	0.118786		610882	3.08096e+06	-0.239333
601672	3.07538e+06	0.116199		610898	3.08096e+06	-0.207487
601688	3.07538e+06	0.210824		614032	3.08096e+06	-0.18242
601702	3.07538e+06	0.255845		614048	3.08096e+06	-0.187623
601718	3.07538e+06	0.221551		614062	3.08096e+06	-0.204002
601732	3.07538e+06	0.185205		614078	3.08096e+06	-0.192184
601748	3.07538e+06	0.169719		614092	3.08096e+06	-0.0910233
601762	3.07538e+06	0.164611		614108	3.08096e+06	-0.0761032
601778	3.07538e+06	0.121408		614122	3.08096e+06	-0.0963077
601792	3.07538e+06	0.0938849		614138	3.08096e+06	-0.0506318
601808	3.07538e+06	0.0680633		614152	3.08096e+06	0.0699841
601822	3.07538e+06	0.0188011		614168	3.08096e+06	0.189052
601838	3.07538e+06	-0.010852		614182	3.08096e+06	0.22244
601852	3.07538e+06	-0.0167924		614198	3.08096e+06	0.142549
601508	3.07537e+06	0.23552		614212	3.08096e+06	0.140363
601522	3.07537e+06	0.195652		614228	3.08096e+06	0.132159
601538	3.07537e+06	0.119412		614242	3.08096e+06	0.188314
601552	3.07537e+06	0.124167		614258	3.08096e+06	0.300454
601568	3.07537e+06	0.139889		614272	3.08096e+06	0.36508
601582	3.07537e+06	0.158568		614288	3.08096e+06	0.337779
601598	3.07537e+06	0.17232		614302	3.08096e+06	0.217013
601612	3.07537e+06	0.175845		614318	3.08096e+06	0.0930811
601628	3.07537e+06	0.187255		614332	3.08096e+06	0.00850156
601642	3.07537e+06	0.185588		614348	3.08096e+06	-0.0544811
601658	3.07537e+06	0.150993		614362	3.08096e+06	-0.0932078
601672	3.07537e+06	0.1241		614378	3.08096e+06	-0.109409
601688	3.07537e+06	0.222329		614392	3.08096e+06	-0.084901
601702	3.07537e+06	0.260442		614408	3.08096e+06	-0.0850278
601718	3.07537e+06	0.228196		614422	3.08096e+06	-0.0671802
601732	3.07537e+06	0.185804		614438	3.08096e+06	-0.0336351
601748	3.07537e+06	0.169068		614452	3.08096e+06	-0.000285222
601762	3.07537e+06	0.167472		614468	3.08096e+06	0.00491967
601778	3.07537e+06	0.123852		614482	3.08096e+06	-0.0307062
601792	3.07537e+06	0.0799848		614498	3.08096e+06	-0.107941
601808	3.07537e+06	0.0611426		614512	3.08096e+06	-0.2152
601822	3.07537e+06	0.0617558		614528	3.08096e+06	-0.329845
601838	3.07537e+06	0.0547939		614542	3.08096e+06	-0.425063
601852	3.07537e+06	-0.0201044		614558	3.08096e+06	-0.476607
601508	3.07535e+06	0.190379		614572	3.08096e+06	-0.469204
601522	3.07535e+06	0.16743		614588	3.08096e+06	-0.391169
601538	3.07535e+06	0.113925		614602	3.08096e+06	-0.271028
601552	3.07535e+06	0.130771		610238	3.08095e+06	-0.356677
601568	3.07535e+06	0.149867		610252	3.08095e+06	-0.373511
601582	3.07535e+06	0.163166		610268	3.08095e+06	-0.364439
601598	3.07535e+06	0.167958		610282	3.08095e+06	-0.344461
601612	3.07535e+06	0.16843		610298	3.08095e+06	-0.343705
601628	3.07535e+06	0.178848		610312	3.08095e+06	-0.367472
601642	3.07535e+06	0.188343		610328	3.08095e+06	-0.408649
601658	3.07535e+06	0.174235		610342	3.08095e+06	-0.459983
601672	3.07535e+06	0.120143		610358	3.08095e+06	-0.50837
601688	3.07535e+06	0.14568		610372	3.08095e+06	-0.543972
601702	3.07535e+06	0.198511		610388	3.08095e+06	-0.56785
601718	3.07535e+06	0.207047		610402	3.08095e+06	-0.563285
601732	3.07535e+06	0.187394		610418	3.08095e+06	-0.536277
601748	3.07535e+06	0.175967		610432	3.08095e+06	-0.509364
601762	3.07535e+06	0.157792		610448	3.08095e+06	-0.487821
601778	3.07535e+06	0.121772		610462	3.08095e+06	-0.472133
601792	3.07535e+06	0.0887178		610478	3.08095e+06	-0.461884
601808	3.07535e+06	0.0780665		610492	3.08095e+06	-0.453753
601822	3.07535e+06	0.105113		610508	3.08095e+06	-0.446221
601838	3.07535e+06	0.0999565		610522	3.08095e+06	-0.440127
601852	3.07535e+06	0.0154083		610538	3.08095e+06	-0.441021
601508	3.07534e+06	0.172236		610552	3.08095e+06	-0.44705
601522	3.07534e+06	0.120356		610568	3.08095e+06	-0.448349
601538	3.07534e+06	0.111453		610582	3.08095e+06	-0.439145
601552	3.07534e+06	0.146176		610598	3.08095e+06	-0.430724
601568	3.07534e+06	0.167288		610612	3.08095e+06	-0.42871
601582	3.07534e+06	0.16861		610628	3.08095e+06	-0.430246
601598	3.07534e+06	0.162558		610642	3.08095e+06	-0.425424
601612	3.07534e+06	0.160136		610658	3.08095e+06	-0.410276
601628	3.07534e+06	0.166217		610672	3.08095e+06	-0.38917
601642	3.07534e+06	0.17414		610688	3.08095e+06	-0.366739
601658	3.07534e+06	0.16568		610702	3.08095e+06	-0.344938
601672	3.07534e+06	0.120335		610718	3.08095e+06	-0.320385
601688	3.07534e+06	0.126705		610732	3.08095e+06	-0.278066
601702	3.07534e+06	0.167378		610748	3.08095e+06	-0.21085
601718	3.07534e+06	0.187334		610762	3.08095e+06	-0.139552
601732	3.07534e+06	0.19373		610778	3.08095e+06	-0.0912499
601748	3.07534e+06	0.183615		610792	3.08095e+06	-0.077212
601762	3.07534e+06	0.15754		610808	3.08095e+06	-0.097309
601778	3.07534e+06	0.147882		610822	3.08095e+06	-0.177156
601792	3.07534e+06	0.11758		610838	3.08095e+06	-0.286914
601808	3.07534e+06	0.0825159		610852	3.08095e+06	-0.358579
601822	3.07534e+06	0.116083		610868	3.08095e+06	-0.342378
601838	3.07534e+06	0.13401		610882	3.08095e+06	-0.290592
601852	3.07534e+06	0.0669643		614032	3.08095e+06	-0.181284
601508	3.07532e+06	0.162736		614048	3.08095e+06	-0.261989
601522	3.07532e+06	0.107425		614062	3.08095e+06	-0.339854
601538	3.07532e+06	0.116592		614078	3.08095e+06	-0.319113
601552	3.07532e+06	0.159643		614092	3.08095e+06	-0.154388
601568	3.07532e+06	0.177546		614108	3.08095e+06	-0.09818
601582	3.07532e+06	0.16826		614122	3.08095e+06	-0.10729
601598	3.07532e+06	0.153801		614138	3.08095e+06	-0.0592743
601612	3.07532e+06	0.149555		614152	3.08095e+06	0.0720037
601628	3.07532e+06	0.149128		614168	3.08095e+06	0.22031
601642	3.07532e+06	0.150705		614182	3.08095e+06	0.258829
601658	3.07532e+06	0.148702		614198	3.08095e+06	0.1674
601672	3.07532e+06	0.13513		614212	3.08095e+06	0.18155
601688	3.07532e+06	0.145352		614228	3.08095e+06	0.214709
601702	3.07532e+06	0.173979		614242	3.08095e+06	0.226721
601718	3.07532e+06	0.194527		614258	3.08095e+06	0.348123
601732	3.07532e+06	0.198197		614272	3.08095e+06	0.424629
601748	3.07532e+06	0.192941		614288	3.08095e+06	0.36566
601762	3.07532e+06	0.184392		614302	3.08095e+06	0.249973
601778	3.07532e+06	0.17462		614318	3.08095e+06	0.150457
601792	3.07532e+06	0.137387		614332	3.08095e+06	0.0431237
601808	3.07532e+06	0.0723751		614348	3.08095e+06	-0.0496117
601822	3.07532e+06	0.0798155		614362	3.08095e+06	-0.0667306
601838	3.07532e+06	0.109488		614378	3.08095e+06	-0.0615443
601852	3.07532e+06	0.0581261		614392	3.08095e+06	-0.102316
601508	3.07531e+06	0.135941		614408	3.08095e+06	-0.119731
601522	3.07531e+06	0.110622		614422	3.08095e+06	-0.107612
601538	3.07531e+06	0.145691		614438	3.08095e+06	-0.0814148
601552	3.07531e+06	0.185924		614452	3.08095e+06	-0.021693
601568	3.07531e+06	0.186507		614468	3.08095e+06	-0.0174702
601582	3.07531e+06	0.16498		614482	3.08095e+06	-0.0647362
601598	3.07531e+06	0.147793		614498	3.08095e+06	-0.147444
601612	3.07531e+06	0.143362		614512	3.08095e+06	-0.253329
601628	3.07531e+06	0.142204		614528	3.08095e+06	-0.360455
601642	3.07531e+06	0.144511		614542	3.08095e+06	-0.443022
601658	3.07531e+06	0.143131		614558	3.08095e+06	-0.478201
601672	3.07531e+06	0.14819		614572	3.08095e+06	-0.45101
601688	3.07531e+06	0.159787		614588	3.08095e+06	-0.346962
601702	3.07531e+06	0.17609		614602	3.08095e+06	-0.225629
601718	3.07531e+06	0.194297		610222	3.08093e+06	-0.275647
601732	3.07531e+06	0.200576		610238	3.08093e+06	-0.34665
601748	3.07531e+06	0.198539		610252	3.08093e+06	-0.401855
601762	3.07531e+06	0.186933		610268	3.08093e+06	-0.404903
601778	3.07531e+06	0.176192		610282	3.08093e+06	-0.397933
601792	3.07531e+06	0.143584		610298	3.08093e+06	-0.407919
601808	3.07531e+06	0.0994021		610312	3.08093e+06	-0.427173
601822	3.07531e+06	0.0589995		610328	3.08093e+06	-0.473237
601838	3.07531e+06	0.101046		610342	3.08093e+06	-0.528403
601852	3.07531e+06	0.041285		610358	3.08093e+06	-0.570431
601508	3.07529e+06	0.141753		610372	3.08093e+06	-0.601223
601522	3.07529e+06	0.132002		610388	3.08093e+06	-0.620952
601538	3.07529e+06	0.160788		610402	3.08093e+06	-0.602935
601552	3.07529e+06	0.184904		610418	3.08093e+06	-0.558999
601568	3.07529e+06	0.184031		610432	3.08093e+06	-0.519173
601582	3.07529e+06	0.159524		610448	3.08093e+06	-0.50104
601598	3.07529e+06	0.142905		610462	3.08093e+06	-0.492358
601612	3.07529e+06	0.139242		610478	3.08093e+06	-0.481989
601628	3.07529e+06	0.141373		610492	3.08093e+06	-0.469344
601642	3.07529e+06	0.145463		610508	3.08093e+06	-0.459473
601658	3.07529e+06	0.14663		610522	3.08093e+06	-0.451241
601672	3.07529e+06	0.178647		610538	3.08093e+06	-0.446449
601688	3.07529e+06	0.198104		610552	3.08093e+06	-0.444246
601702	3.07529e+06	0.186398		610568	3.08093e+06	-0.441292
601718	3.07529e+06	0.189471		610582	3.08093e+06	-0.439912
601732	3.07529e+06	0.199084		610598	3.08093e+06	-0.439758
601748	3.07529e+06	0.194673		610612	3.08093e+06	-0.440915
601762	3.07529e+06	0.173933		610628	3.08093e+06	-0.443392
601778	3.07529e+06	0.174299		610642	3.08093e+06	-0.437831
601792	3.07529e+06	0.159799		610658	3.08093e+06	-0.423216
601808	3.07529e+06	0.121135		610672	3.08093e+06	-0.402069
601822	3.07529e+06	0.0930816		610688	3.08093e+06	-0.377908
601838	3.07529e+06	0.0553594		610702	3.08093e+06	-0.352392
601852	3.07529e+06	-0.0144654		610718	3.08093e+06	-0.322206
601508	3.07528e+06	0.131992		610732	3.08093e+06	-0.278175
601522	3.07528e+06	0.148558		610748	3.08093e+06	-0.210794
601538	3.07528e+06	0.167651		610762	3.08093e+06	-0.135134
601552	3.07528e+06	0.177578		610778	3.08093e+06	-0.0863995
601568	3.07528e+06	0.16679		610792	3.08093e+06	-0.0743972
601582	3.07528e+06	0.147736		610808	3.08093e+06	-0.102869
601598	3.07528e+06	0.139971		610822	3.08093e+06	-0.18455
601612	3.07528e+06	0.138598		610838	3.08093e+06	-0.28978
601628	3.07528e+06	0.142946		610852	3.08093e+06	-0.363495
601642	3.07528e+06	0.147061		610868	3.08093e+06	-0.367431
601658	3.07528e+06	0.155689		610882	3.08093e+06	-0.354877
601672	3.07528e+06	0.199645		614032	3.08093e+06	-0.138329
601688	3.07528e+06	0.216518		614048	3.08093e+06	-0.258322
601702	3.07528e+06	0.194533		614062	3.08093e+06	-0.365277
601718	3.07528e+06	0.187066		614078	3.08093e+06	-0.386647
601732	3.07528e+06	0.202108		614092	3.08093e+06	-0.215328
601748	3.07528e+06	0.197695		614108	3.08093e+06	-0.0994126
601762	3.07528e+06	0.165767		614122	3.08093e+06	-0.107448
601778	3.07528e+06	0.151271		614138	3.08093e+06	-0.0748027
601792	3.07528e+06	0.135905		614152	3.08093e+06	0.077635
601808	3.07528e+06	0.129955		614168	3.08093e+06	0.234172
601822	3.07528e+06	0.136275		614182	3.08093e+06	0.263123
601838	3.07528e+06	0.0326235		614198	3.08093e+06	0.10805
601852	3.07528e+06	-0.063133		614212	3.08093e+06	0.120843
601868	3.07528e+06	-0.0524854		614228	3.08093e+06	0.182274
601508	3.07526e+06	0.128941		614242	3.08093e+06	0.281451
601522	3.07526e+06	0.163475		614258	3.08093e+06	0.416099
601538	3.07526e+06	0.177464		614272	3.08093e+06	0.465548
601552	3.07526e+06	0.175743		614288	3.08093e+06	0.389229
601568	3.07526e+06	0.164012		614302	3.08093e+06	0.307836
601582	3.07526e+06	0.149615		614318	3.08093e+06	0.192743
601598	3.07526e+06	0.142792		614332	3.08093e+06	0.0598968
601612	3.07526e+06	0.14395		614348	3.08093e+06	-0.0389794
601628	3.07526e+06	0.146537		614362	3.08093e+06	-0.0851986
601642	3.07526e+06	0.149683		614378	3.08093e+06	-0.0998767
601658	3.07526e+06	0.161539		614392	3.08093e+06	-0.117802
601672	3.07526e+06	0.204903		614408	3.08093e+06	-0.127013
601688	3.07526e+06	0.216233		614422	3.08093e+06	-0.146995
601702	3.07526e+06	0.182541		614438	3.08093e+06	-0.104979
601718	3.07526e+06	0.173819		614452	3.08093e+06	-0.0278961
601732	3.07526e+06	0.194969		614468	3.08093e+06	-0.0347201
601748	3.07526e+06	0.19735		614482	3.08093e+06	-0.107211
601762	3.07526e+06	0.167842		614498	3.08093e+06	-0.214264
601778	3.07526e+06	0.138919		614512	3.08093e+06	-0.329232
601792	3.07526e+06	0.0989078		614528	3.08093e+06	-0.43181
601808	3.07526e+06	0.0821027		614542	3.08093e+06	-0.500731
601822	3.07526e+06	0.109614		614558	3.08093e+06	-0.516841
601838	3.07526e+06	0.0380219		614572	3.08093e+06	-0.465607
601852	3.07526e+06	-0.062171		614588	3.08093e+06	-0.334307
601868	3.07526e+06	-0.0471821		614602	3.08093e+06	-0.2103
601508	3.07525e+06	0.124246		610222	3.08092e+06	-0.24781
601522	3.07525e+06	0.172138		610238	3.08092e+06	-0.338114
601538	3.07525e+06	0.189898		610252	3.08092e+06	-0.400521
601552	3.07525e+06	0.181866		610268	3.08092e+06	-0.418103
601568	3.07525e+06	0.172539		610282	3.08092e+06	-0.438898
601582	3.07525e+06	0.160543		610298	3.08092e+06	-0.472306
601598	3.07525e+06	0.153936		610312	3.08092e+06	-0.508328
601612	3.07525e+06	0.153798		610328	3.08092e+06	-0.551899
601628	3.07525e+06	0.153195		610342	3.08092e+06	-0.597893
601642	3.07525e+06	0.154235		610358	3.08092e+06	-0.632063
601658	3.07525e+06	0.171544		610372	3.08092e+06	-0.668771
601672	3.07525e+06	0.219832		610388	3.08092e+06	-0.68334
601688	3.07525e+06	0.217523		610402	3.08092e+06	-0.662681
601702	3.07525e+06	0.171406		610418	3.08092e+06	-0.612606
601718	3.07525e+06	0.163363		610432	3.08092e+06	-0.561407
601732	3.07525e+06	0.191636		610448	3.08092e+06	-0.533036
601748	3.07525e+06	0.192633		610462	3.08092e+06	-0.52321
601762	3.07525e+06	0.162852		610478	3.08092e+06	-0.510942
601778	3.07525e+06	0.120371		610492	3.08092e+06	-0.497443
601792	3.07525e+06	0.0632953		610508	3.08092e+06	-0.485246
601808	3.07525e+06	0.041144		610522	3.08092e+06	-0.473085
601822	3.07525e+06	0.0577101		610538	3.08092e+06	-0.461118
601838	3.07525e+06	0.0628014		610552	3.08092e+06	-0.452341
601852	3.07525e+06	-0.0414522		610568	3.08092e+06	-0.450953
601868	3.07525e+06	-0.0762641		610582	3.08092e+06	-0.454248
601508	3.07523e+06	0.149307		610598	3.08092e+06	-0.456446
601522	3.07523e+06	0.183192		610612	3.08092e+06	-0.45365
601538	3.07523e+06	0.195872		610628	3.08092e+06	-0.471886
601552	3.07523e+06	0.189968		610642	3.08092e+06	-0.479469
601568	3.07523e+06	0.182433		610658	3.08092e+06	-0.469709
601582	3.07523e+06	0.172897		610672	3.08092e+06	-0.448198
601598	3.07523e+06	0.164565		610688	3.08092e+06	-0.418439
601612	3.07523e+06	0.155784		610702	3.08092e+06	-0.382492
601628	3.07523e+06	0.155439		610718	3.08092e+06	-0.336362
601642	3.07523e+06	0.162431		610732	3.08092e+06	-0.276165
601658	3.07523e+06	0.18185		610748	3.08092e+06	-0.206667
601672	3.07523e+06	0.225321		610762	3.08092e+06	-0.139576
601688	3.07523e+06	0.209077		610778	3.08092e+06	-0.0867463
601702	3.07523e+06	0.163689		610792	3.08092e+06	-0.0695992
601718	3.07523e+06	0.166713		610808	3.08092e+06	-0.122581
601732	3.07523e+06	0.195378		610822	3.08092e+06	-0.230958
601748	3.07523e+06	0.18946		610838	3.08092e+06	-0.336327
601762	3.07523e+06	0.153652		610852	3.08092e+06	-0.402627
601778	3.07523e+06	0.103783		610868	3.08092e+06	-0.406294
601792	3.07523e+06	0.0591056		610882	3.08092e+06	-0.405633
601808	3.07523e+06	0.034111		614032	3.08092e+06	-0.0744987
601822	3.07523e+06	0.0391086		614048	3.08092e+06	-0.220143
601838	3.07523e+06	0.0397138		614062	3.08092e+06	-0.33189
601852	3.07523e+06	-0.0570012		614078	3.08092e+06	-0.361873
601868	3.07523e+06	-0.130319		614092	3.08092e+06	-0.259431
601508	3.07522e+06	0.160267		614108	3.08092e+06	-0.135095
601522	3.07522e+06	0.177202		614122	3.08092e+06	-0.118779
601538	3.07522e+06	0.193605		614138	3.08092e+06	-0.0999699
601552	3.07522e+06	0.194476		614152	3.08092e+06	0.0378631
601568	3.07522e+06	0.18991		614168	3.08092e+06	0.152872
601582	3.07522e+06	0.179894		614182	3.08092e+06	0.146278
601598	3.07522e+06	0.15766		614198	3.08092e+06	0.0200713
601612	3.07522e+06	0.146988		614212	3.08092e+06	0.014977
601628	3.07522e+06	0.155083		614228	3.08092e+06	0.0513132
601642	3.07522e+06	0.168992		614242	3.08092e+06	0.208734
601658	3.07522e+06	0.18833		614258	3.08092e+06	0.395779
601672	3.07522e+06	0.207356		614272	3.08092e+06	0.44455
601688	3.07522e+06	0.174609		614288	3.08092e+06	0.380738
601702	3.07522e+06	0.14967		614302	3.08092e+06	0.302126
601718	3.07522e+06	0.159187		614318	3.08092e+06	0.178695
601732	3.07522e+06	0.188918		614332	3.08092e+06	0.0547234
601748	3.07522e+06	0.187647		614348	3.08092e+06	-0.0387943
601762	3.07522e+06	0.153331		614362	3.08092e+06	-0.122555
601778	3.07522e+06	0.109128		614378	3.08092e+06	-0.170517
601792	3.07522e+06	0.076351		614392	3.08092e+06	-0.157615
601808	3.07522e+06	0.0470414		614408	3.08092e+06	-0.172806
601822	3.07522e+06	0.0214987		614422	3.08092e+06	-0.204869
601838	3.07522e+06	0.00921447		614438	3.08092e+06	-0.0924411
601852	3.07522e+06	-0.119543		614452	3.08092e+06	-0.0247058
601868	3.07522e+06	-0.189151		614468	3.08092e+06	-0.0367809
601508	3.0752e+06	0.170831		614482	3.08092e+06	-0.125993
601522	3.0752e+06	0.181854		614498	3.08092e+06	-0.255278
601538	3.0752e+06	0.189859		614512	3.08092e+06	-0.387163
601552	3.0752e+06	0.195688		614528	3.08092e+06	-0.490868
601568	3.0752e+06	0.19024		614542	3.08092e+06	-0.545566
601582	3.0752e+06	0.156534		614558	3.08092e+06	-0.539899
601598	3.0752e+06	0.128605		614572	3.08092e+06	-0.46643
601612	3.0752e+06	0.137107		614588	3.08092e+06	-0.317727
601628	3.0752e+06	0.160787		614602	3.08092e+06	-0.193815
601642	3.0752e+06	0.172088		610208	3.0809e+06	-0.01025
601658	3.0752e+06	0.186635		610222	3.0809e+06	-0.180143
601672	3.0752e+06	0.192191		610238	3.0809e+06	-0.311446
601688	3.0752e+06	0.162515		610252	3.0809e+06	-0.382378
601702	3.0752e+06	0.144742		610268	3.0809e+06	-0.415624
601718	3.0752e+06	0.160597		610282	3.0809e+06	-0.454314
601732	3.0752e+06	0.182051		610298	3.0809e+06	-0.506779
601748	3.0752e+06	0.175376		610312	3.0809e+06	-0.563154
601762	3.0752e+06	0.153779		610328	3.0809e+06	-0.608218
601778	3.0752e+06	0.132272		610342	3.0809e+06	-0.642687
601792	3.0752e+06	0.113278		610358	3.0809e+06	-0.683292
601808	3.0752e+06	0.0863306		610372	3.0809e+06	-0.717275
601822	3.0752e+06	0.0269889		610388	3.0809e+06	-0.725744
601838	3.0752e+06	0.00650592		610402	3.0809e+06	-0.709461
601852	3.0752e+06	-0.134394		610418	3.0809e+06	-0.665956
601868	3.0752e+06	-0.22052		610432	3.0809e+06	-0.611039
601508	3.07519e+06	0.190234		610448	3.0809e+06	-0.570426
601522	3.07519e+06	0.199701		610462	3.0809e+06	-0.555124
601538	3.07519e+06	0.194229		610478	3.0809e+06	-0.544882
601552	3.07519e+06	0.196235		610492	3.0809e+06	-0.532062
601568	3.07519e+06	0.175593		610508	3.0809e+06	-0.516463
601582	3.07519e+06	0.136025		610522	3.0809e+06	-0.500345
601598	3.07519e+06	0.113774		610538	3.0809e+06	-0.484121
601612	3.07519e+06	0.128704		610552	3.0809e+06	-0.470918
601628	3.07519e+06	0.153288		610568	3.0809e+06	-0.465643
601642	3.07519e+06	0.164034		610582	3.0809e+06	-0.46832
601658	3.07519e+06	0.177799		610598	3.0809e+06	-0.469586
601672	3.07519e+06	0.181658		610612	3.0809e+06	-0.460966
601688	3.07519e+06	0.159209		610628	3.0809e+06	-0.478653
601702	3.07519e+06	0.141058		610642	3.0809e+06	-0.528367
601718	3.07519e+06	0.163157		610658	3.0809e+06	-0.529339
601732	3.07519e+06	0.170502		610672	3.0809e+06	-0.508835
601748	3.07519e+06	0.157858		610688	3.0809e+06	-0.474558
601762	3.07519e+06	0.152217		610702	3.0809e+06	-0.42842
601778	3.07519e+06	0.147031		610718	3.0809e+06	-0.365288
601792	3.07519e+06	0.136106		610732	3.0809e+06	-0.287492
601808	3.07519e+06	0.122396		610748	3.0809e+06	-0.205562
601822	3.07519e+06	0.083967		610762	3.0809e+06	-0.133572
601838	3.07519e+06	0.0122227		610778	3.0809e+06	-0.0815759
601852	3.07519e+06	-0.112117		610792	3.0809e+06	-0.0575303
601868	3.07519e+06	-0.200955		610808	3.0809e+06	-0.11412
601508	3.07517e+06	0.209015		610822	3.0809e+06	-0.248333
601522	3.07517e+06	0.210908		610838	3.0809e+06	-0.383349
601538	3.07517e+06	0.203093		610852	3.0809e+06	-0.458167
601552	3.07517e+06	0.200581		610868	3.0809e+06	-0.472985
601568	3.07517e+06	0.181555		610882	3.0809e+06	-0.462081
601582	3.07517e+06	0.145522		610898	3.0809e+06	-0.498959
601598	3.07517e+06	0.111762		614032	3.0809e+06	0.0734996
601612	3.07517e+06	0.102399		614048	3.0809e+06	-0.123639
601628	3.07517e+06	0.114206		614062	3.0809e+06	-0.261224
601642	3.07517e+06	0.129429		614078	3.0809e+06	-0.320336
601658	3.07517e+06	0.154386		614092	3.0809e+06	-0.244237
601672	3.07517e+06	0.159846		614108	3.0809e+06	-0.140417
601688	3.07517e+06	0.143413		614122	3.0809e+06	-0.148757
601702	3.07517e+06	0.134549		614138	3.0809e+06	-0.0766071
601718	3.07517e+06	0.163252		614152	3.0809e+06	0.147045
601732	3.07517e+06	0.168943		614168	3.0809e+06	0.202868
601748	3.07517e+06	0.151254		614182	3.0809e+06	0.116461
601762	3.07517e+06	0.148881		614198	3.0809e+06	0.0148074
601778	3.07517e+06	0.135339		614212	3.0809e+06	-0.004828
601792	3.07517e+06	0.131549		614228	3.0809e+06	0.0240298
601808	3.07517e+06	0.116339		614242	3.0809e+06	0.184135
601822	3.07517e+06	0.0915547		614258	3.0809e+06	0.320771
601838	3.07517e+06	0.0142818		614272	3.0809e+06	0.385972
601852	3.07517e+06	-0.130347		614288	3.0809e+06	0.358397
601868	3.07517e+06	-0.197861		614302	3.0809e+06	0.294101
601508	3.07516e+06	0.252753		614318	3.0809e+06	0.202915
601522	3.07516e+06	0.244925		614332	3.0809e+06	0.0692111
601538	3.07516e+06	0.219751		614348	3.0809e+06	-0.0356184
601552	3.07516e+06	0.226607		614362	3.0809e+06	-0.121855
601568	3.07516e+06	0.218134		614378	3.0809e+06	-0.187354
601582	3.07516e+06	0.185832		614392	3.0809e+06	-0.269704
601598	3.07516e+06	0.144918		614408	3.0809e+06	-0.249418
601612	3.07516e+06	0.10995		614422	3.0809e+06	-0.169551
601628	3.07516e+06	0.0928917		614438	3.0809e+06	-0.0432727
601642	3.07516e+06	0.0955701		614452	3.0809e+06	0.0145618
601658	3.07516e+06	0.10471		614468	3.0809e+06	-0.00833489
601672	3.07516e+06	0.108978		614482	3.0809e+06	-0.109836
601688	3.07516e+06	0.114018		614498	3.0809e+06	-0.252474
601702	3.07516e+06	0.124919		614512	3.0809e+06	-0.393292
601718	3.07516e+06	0.172437		614528	3.0809e+06	-0.497951
601732	3.07516e+06	0.17261		614542	3.0809e+06	-0.540063
601748	3.07516e+06	0.151965		614558	3.0809e+06	-0.511419
601762	3.07516e+06	0.145655		614572	3.0809e+06	-0.413352
601778	3.07516e+06	0.12919		614588	3.0809e+06	-0.254723
601792	3.07516e+06	0.123505		610208	3.08089e+06	0.0239536
601808	3.07516e+06	0.102681		610222	3.08089e+06	-0.152544
601822	3.07516e+06	0.0692624		610238	3.08089e+06	-0.276927
601838	3.07516e+06	-0.0119386		610252	3.08089e+06	-0.357032
601852	3.07516e+06	-0.162789		610268	3.08089e+06	-0.410279
601868	3.07516e+06	-0.285779		610282	3.08089e+06	-0.472261
601508	3.07514e+06	0.304076		610298	3.08089e+06	-0.539797
601522	3.07514e+06	0.276593		610312	3.08089e+06	-0.597847
601538	3.07514e+06	0.241039		610328	3.08089e+06	-0.637192
601552	3.07514e+06	0.257428		610342	3.08089e+06	-0.669326
601568	3.07514e+06	0.245436		610358	3.08089e+06	-0.711228
601582	3.07514e+06	0.216476		610372	3.08089e+06	-0.748613
601598	3.07514e+06	0.189661		610388	3.08089e+06	-0.759421
601612	3.07514e+06	0.161344		610402	3.08089e+06	-0.741081
601628	3.07514e+06	0.111103		610418	3.08089e+06	-0.698045
601642	3.07514e+06	0.0887446		610432	3.08089e+06	-0.643915
601658	3.07514e+06	0.0929312		610448	3.08089e+06	-0.602622
601672	3.07514e+06	0.0917575		610462	3.08089e+06	-0.585067
601688	3.07514e+06	0.085928		610478	3.08089e+06	-0.576929
601702	3.07514e+06	0.0941112		610492	3.08089e+06	-0.565861
601718	3.07514e+06	0.146708		610508	3.08089e+06	-0.551879
601732	3.07514e+06	0.182267		610522	3.08089e+06	-0.532105
601748	3.07514e+06	0.162184		610538	3.08089e+06	-0.507739
601762	3.07514e+06	0.135043		610552	3.08089e+06	-0.490644
601778	3.07514e+06	0.119586		610568	3.08089e+06	-0.483397
601792	3.07514e+06	0.104321		610582	3.08089e+06	-0.484083
601808	3.07514e+06	0.0691975		610598	3.08089e+06	-0.482649
601822	3.07514e+06	0.0401098		610612	3.08089e+06	-0.472093
601838	3.07514e+06	-0.0345585		610628	3.08089e+06	-0.471313
601852	3.07514e+06	-0.167274		610642	3.08089e+06	-0.539103
601868	3.07514e+06	-0.343166		610658	3.08089e+06	-0.582639
601508	3.07513e+06	0.317824		610672	3.08089e+06	-0.565395
601522	3.07513e+06	0.269877		610688	3.08089e+06	-0.530443
601538	3.07513e+06	0.214034		610702	3.08089e+06	-0.477889
601552	3.07513e+06	0.236382		610718	3.08089e+06	-0.402749
601568	3.07513e+06	0.246004		610732	3.08089e+06	-0.312069
601582	3.07513e+06	0.244877		610748	3.08089e+06	-0.219838
601598	3.07513e+06	0.270198		610762	3.08089e+06	-0.138895
601612	3.07513e+06	0.24934		610778	3.08089e+06	-0.0786489
601628	3.07513e+06	0.123068		610792	3.08089e+06	-0.0599712
601642	3.07513e+06	0.0849524		610808	3.08089e+06	-0.117306
601658	3.07513e+06	0.0818986		610822	3.08089e+06	-0.244162
601672	3.07513e+06	0.075608		610838	3.08089e+06	-0.378196
601688	3.07513e+06	0.0700784		610852	3.08089e+06	-0.464157
601702	3.07513e+06	0.0736423		610868	3.08089e+06	-0.510891
601718	3.07513e+06	0.133044		610882	3.08089e+06	-0.528883
601732	3.07513e+06	0.197217		610898	3.08089e+06	-0.544271
601748	3.07513e+06	0.174498		614018	3.08089e+06	0.214758
601762	3.07513e+06	0.1241		614032	3.08089e+06	0.130032
601778	3.07513e+06	0.0950157		614048	3.08089e+06	-0.0493048
601792	3.07513e+06	0.0747956		614062	3.08089e+06	-0.233381
601808	3.07513e+06	0.0588364		614078	3.08089e+06	-0.33953
601822	3.07513e+06	0.0372805		614092	3.08089e+06	-0.296341
601838	3.07513e+06	-0.0481591		614108	3.08089e+06	-0.151174
601852	3.07513e+06	-0.172113		614122	3.08089e+06	-0.121917
601868	3.07513e+06	-0.354761		614138	3.08089e+06	-0.001869
601882	3.07513e+06	-0.391516		614152	3.08089e+06	0.215775
601508	3.07511e+06	0.288423		614168	3.08089e+06	0.236811
601522	3.07511e+06	0.231975		614182	3.08089e+06	0.130466
601538	3.07511e+06	0.165393		614198	3.08089e+06	0.0923602
601552	3.07511e+06	0.213402		614212	3.08089e+06	0.101527
601568	3.07511e+06	0.256346		614228	3.08089e+06	0.139403
601582	3.07511e+06	0.27068		614242	3.08089e+06	0.252448
601598	3.07511e+06	0.296671		614258	3.08089e+06	0.333076
601612	3.07511e+06	0.2648		614272	3.08089e+06	0.368392
601628	3.07511e+06	0.131747		614288	3.08089e+06	0.354464
601642	3.07511e+06	0.093842		614302	3.08089e+06	0.309702
601658	3.07511e+06	0.0909987		614318	3.08089e+06	0.20925
601672	3.07511e+06	0.0847449		614332	3.08089e+06	0.0813861
601688	3.07511e+06	0.0755353		614348	3.08089e+06	-0.0108219
601702	3.07511e+06	0.0853516		614362	3.08089e+06	-0.114157
601718	3.07511e+06	0.158617		614378	3.08089e+06	-0.264256
601732	3.07511e+06	0.204052		614392	3.08089e+06	-0.294394
601748	3.07511e+06	0.167754		614408	3.08089e+06	-0.186453
601762	3.07511e+06	0.0901797		614422	3.08089e+06	-0.0407542
601778	3.07511e+06	0.0502777		614438	3.08089e+06	0.0699288
601792	3.07511e+06	0.0281184		614452	3.08089e+06	0.113157
601808	3.07511e+06	0.0424256		614468	3.08089e+06	0.0780564
601822	3.07511e+06	0.0280695		614482	3.08089e+06	-0.0315478
601838	3.07511e+06	-0.0454678		614498	3.08089e+06	-0.181445
601852	3.07511e+06	-0.150079		614512	3.08089e+06	-0.326026
601868	3.07511e+06	-0.300619		614528	3.08089e+06	-0.428428
601882	3.07511e+06	-0.357367		614542	3.08089e+06	-0.46159
601508	3.0751e+06	0.257567		614558	3.08089e+06	-0.41966
601522	3.0751e+06	0.204033		614572	3.08089e+06	-0.300638
601538	3.0751e+06	0.152515		614588	3.08089e+06	-0.18048
601552	3.0751e+06	0.220984		610208	3.08087e+06	0.0613434
601568	3.0751e+06	0.272288		610222	3.08087e+06	-0.158046
601582	3.0751e+06	0.283477		610238	3.08087e+06	-0.262255
601598	3.0751e+06	0.294188		610252	3.08087e+06	-0.33818
601612	3.0751e+06	0.228536		610268	3.08087e+06	-0.40333
601628	3.0751e+06	0.136836		610282	3.08087e+06	-0.484018
601642	3.0751e+06	0.111742		610298	3.08087e+06	-0.551491
601658	3.0751e+06	0.106896		610312	3.08087e+06	-0.60182
601672	3.0751e+06	0.101084		610328	3.08087e+06	-0.646211
601688	3.0751e+06	0.0898994		610342	3.08087e+06	-0.68436
601702	3.0751e+06	0.102418		610358	3.08087e+06	-0.725613
601718	3.0751e+06	0.164755		610372	3.08087e+06	-0.766884
601732	3.0751e+06	0.196928		610388	3.08087e+06	-0.793178
601748	3.0751e+06	0.128468		610402	3.08087e+06	-0.770061
601762	3.0751e+06	0.0686953		610418	3.08087e+06	-0.729548
601778	3.0751e+06	0.0483911		610432	3.08087e+06	-0.677943
601792	3.0751e+06	0.0401984		610448	3.08087e+06	-0.637003
601808	3.0751e+06	0.0599768		610462	3.08087e+06	-0.61732
601822	3.0751e+06	0.0274027		610478	3.08087e+06	-0.611766
601838	3.0751e+06	-0.0653316		610492	3.08087e+06	-0.606992
601852	3.0751e+06	-0.14422		610508	3.08087e+06	-0.593254
601868	3.0751e+06	-0.231069		610522	3.08087e+06	-0.564109
601882	3.0751e+06	-0.289575		610538	3.08087e+06	-0.534905
601508	3.07508e+06	0.231217		610552	3.08087e+06	-0.518374
601522	3.07508e+06	0.177357		610568	3.08087e+06	-0.510681
601538	3.07508e+06	0.123587		610582	3.08087e+06	-0.50771
601552	3.07508e+06	0.169407		610598	3.08087e+06	-0.504604
601568	3.07508e+06	0.244451		610612	3.08087e+06	-0.493351
601582	3.07508e+06	0.29548		610628	3.08087e+06	-0.486573
601598	3.07508e+06	0.291325		610642	3.08087e+06	-0.538443
601612	3.07508e+06	0.203383		610658	3.08087e+06	-0.607817
601628	3.07508e+06	0.141027		610672	3.08087e+06	-0.608567
601642	3.07508e+06	0.122949		610688	3.08087e+06	-0.574746
601658	3.07508e+06	0.114058		610702	3.08087e+06	-0.518417
601672	3.07508e+06	0.104369		610718	3.08087e+06	-0.433536
601688	3.07508e+06	0.0979273		610732	3.08087e+06	-0.327535
601702	3.07508e+06	0.108013		610748	3.08087e+06	-0.216614
601718	3.07508e+06	0.171976		610762	3.08087e+06	-0.119785
601732	3.07508e+06	0.16734		610778	3.08087e+06	-0.0509374
601748	3.07508e+06	0.101089		610792	3.08087e+06	-0.0654377
601762	3.07508e+06	0.0842333		610808	3.08087e+06	-0.166411
601778	3.07508e+06	0.101308		610822	3.08087e+06	-0.261744
601792	3.07508e+06	0.0983359		610838	3.08087e+06	-0.351016
601808	3.07508e+06	0.0727631		610852	3.08087e+06	-0.449959
601822	3.07508e+06	0.0131428		610868	3.08087e+06	-0.520028
601838	3.07508e+06	-0.0710784		610882	3.08087e+06	-0.573228
601852	3.07508e+06	-0.143133		610898	3.08087e+06	-0.597299
601868	3.07508e+06	-0.184429		610912	3.08087e+06	-0.608267
601882	3.07508e+06	-0.234917		614018	3.08087e+06	0.30575
601898	3.07508e+06	-0.269766		614032	3.08087e+06	0.206358
601522	3.07507e+06	0.168508		614048	3.08087e+06	0.0165976
601538	3.07507e+06	0.115249		614062	3.08087e+06	-0.191998
601552	3.07507e+06	0.135875		614078	3.08087e+06	-0.325072
601568	3.07507e+06	0.195476		614092	3.08087e+06	-0.28636
601582	3.07507e+06	0.253575		614108	3.08087e+06	-0.124024
601598	3.07507e+06	0.272346		614122	3.08087e+06	-0.0487326
601612	3.07507e+06	0.192007		614138	3.08087e+06	0.0914052
601628	3.07507e+06	0.131422		614152	3.08087e+06	0.277856
601642	3.07507e+06	0.111446		614168	3.08087e+06	0.247286
601658	3.07507e+06	0.106662		614182	3.08087e+06	0.178037
601672	3.07507e+06	0.102974		614198	3.08087e+06	0.163759
601688	3.07507e+06	0.0840195		614212	3.08087e+06	0.137854
601702	3.07507e+06	0.124386		614228	3.08087e+06	0.117173
601718	3.07507e+06	0.19041		614242	3.08087e+06	0.161304
601732	3.07507e+06	0.135		614258	3.08087e+06	0.264471
601748	3.07507e+06	0.0789299		614272	3.08087e+06	0.325253
601762	3.07507e+06	0.0936076		614288	3.08087e+06	0.338616
601778	3.07507e+06	0.127083		614302	3.08087e+06	0.33803
601792	3.07507e+06	0.122185		614318	3.08087e+06	0.230869
601808	3.07507e+06	0.0639846		614332	3.08087e+06	0.101676
601822	3.07507e+06	-0.0182907		614348	3.08087e+06	0.0142752
601838	3.07507e+06	-0.0705824		614362	3.08087e+06	-0.0975559
601852	3.07507e+06	-0.137372		614378	3.08087e+06	-0.204159
601868	3.07507e+06	-0.211139		614392	3.08087e+06	-0.161396
601882	3.07507e+06	-0.249419		614408	3.08087e+06	-0.0305734
601898	3.07507e+06	-0.267841		614422	3.08087e+06	0.120971
601522	3.07505e+06	0.181348		614438	3.08087e+06	0.229366
601538	3.07505e+06	0.150746		614452	3.08087e+06	0.267205
601552	3.07505e+06	0.152705		614468	3.08087e+06	0.226635
601568	3.07505e+06	0.164102		614482	3.08087e+06	0.115411
601582	3.07505e+06	0.173475		614498	3.08087e+06	-0.035942
601598	3.07505e+06	0.189628		614512	3.08087e+06	-0.18216
601612	3.07505e+06	0.143685		614528	3.08087e+06	-0.284855
601628	3.07505e+06	0.0984215		614542	3.08087e+06	-0.319073
601642	3.07505e+06	0.088784		614558	3.08087e+06	-0.280054
601658	3.07505e+06	0.114466		614572	3.08087e+06	-0.161276
601672	3.07505e+06	0.120847		614588	3.08087e+06	-0.0746745
601688	3.07505e+06	0.0601762		610192	3.08086e+06	0.245423
601702	3.07505e+06	0.091054		610208	3.08086e+06	0.0825221
601718	3.07505e+06	0.125013		610222	3.08086e+06	-0.138735
601732	3.07505e+06	0.0823546		610238	3.08086e+06	-0.204061
601748	3.07505e+06	0.0748653		610252	3.08086e+06	-0.254389
601762	3.07505e+06	0.101268		610268	3.08086e+06	-0.367795
601778	3.07505e+06	0.147955		610282	3.08086e+06	-0.4753
601792	3.07505e+06	0.120212		610298	3.08086e+06	-0.539984
601808	3.07505e+06	0.00231125		610312	3.08086e+06	-0.587358
601822	3.07505e+06	-0.0410438		610328	3.08086e+06	-0.648112
601838	3.07505e+06	-0.0923547		610342	3.08086e+06	-0.689698
601852	3.07505e+06	-0.139019		610358	3.08086e+06	-0.728929
601868	3.07505e+06	-0.189317		610372	3.08086e+06	-0.778506
601882	3.07505e+06	-0.25877		610388	3.08086e+06	-0.815579
601898	3.07505e+06	-0.262756		610402	3.08086e+06	-0.803176
601522	3.07504e+06	0.255709		610418	3.08086e+06	-0.762417
601538	3.07504e+06	0.230398		610432	3.08086e+06	-0.722898
601552	3.07504e+06	0.201823		610448	3.08086e+06	-0.686108
601568	3.07504e+06	0.17689		610462	3.08086e+06	-0.661227
601582	3.07504e+06	0.160678		610478	3.08086e+06	-0.653533
601598	3.07504e+06	0.129643		610492	3.08086e+06	-0.650121
601612	3.07504e+06	0.100544		610508	3.08086e+06	-0.631968
601628	3.07504e+06	0.0793877		610522	3.08086e+06	-0.601706
601642	3.07504e+06	0.101384		610538	3.08086e+06	-0.575134
601658	3.07504e+06	0.146889		610552	3.08086e+06	-0.559156
601672	3.07504e+06	0.15096		610568	3.08086e+06	-0.550399
601688	3.07504e+06	0.0693337		610582	3.08086e+06	-0.547785
601702	3.07504e+06	0.0626221		610598	3.08086e+06	-0.54371
601718	3.07504e+06	0.0802462		610612	3.08086e+06	-0.525747
601732	3.07504e+06	0.0958918		610628	3.08086e+06	-0.509024
601748	3.07504e+06	0.0947355		610642	3.08086e+06	-0.545233
601762	3.07504e+06	0.102754		610658	3.08086e+06	-0.617014
601778	3.07504e+06	0.13872		610672	3.08086e+06	-0.630671
601792	3.07504e+06	0.111529		610688	3.08086e+06	-0.593469
601808	3.07504e+06	-0.0160064		610702	3.08086e+06	-0.53173
601822	3.07504e+06	-0.0707674		610718	3.08086e+06	-0.426408
601838	3.07504e+06	-0.11466		610732	3.08086e+06	-0.298658
601852	3.07504e+06	-0.115053		610748	3.08086e+06	-0.171749
601868	3.07504e+06	-0.137432		610762	3.08086e+06	-0.0658323
601882	3.07504e+06	-0.208214		610778	3.08086e+06	0.00472344
601898	3.07504e+06	-0.221693		610792	3.08086e+06	-0.0252384
601912	3.07504e+06	-0.207843		610808	3.08086e+06	-0.172177
601522	3.07502e+06	0.305293		610822	3.08086e+06	-0.269703
601538	3.07502e+06	0.300701		610838	3.08086e+06	-0.325402
601552	3.07502e+06	0.250666		610852	3.08086e+06	-0.446796
601568	3.07502e+06	0.237141		610868	3.08086e+06	-0.530988
601582	3.07502e+06	0.223575		610882	3.08086e+06	-0.595048
601598	3.07502e+06	0.153		610898	3.08086e+06	-0.637618
601612	3.07502e+06	0.0928379		610912	3.08086e+06	-0.669406
601628	3.07502e+06	0.0884167		610928	3.08086e+06	-0.726439
601642	3.07502e+06	0.130254		614018	3.08086e+06	0.232167
601658	3.07502e+06	0.175327		614032	3.08086e+06	0.246215
601672	3.07502e+06	0.177714		614048	3.08086e+06	0.0718502
601688	3.07502e+06	0.137512		614062	3.08086e+06	-0.115324
601702	3.07502e+06	0.119992		614078	3.08086e+06	-0.244441
601718	3.07502e+06	0.116858		614092	3.08086e+06	-0.168488
601732	3.07502e+06	0.115132		614108	3.08086e+06	-0.00157767
601748	3.07502e+06	0.115919		614122	3.08086e+06	0.026035
601762	3.07502e+06	0.123231		614138	3.08086e+06	0.127159
601778	3.07502e+06	0.127034		614152	3.08086e+06	0.280245
601792	3.07502e+06	0.0785479		614168	3.08086e+06	0.231819
601808	3.07502e+06	-0.0482349		614182	3.08086e+06	0.193986
601822	3.07502e+06	-0.0849273		614198	3.08086e+06	0.162592
601838	3.07502e+06	-0.0983079		614212	3.08086e+06	0.090233
601852	3.07502e+06	-0.0847499		614228	3.08086e+06	0.0306066
601868	3.07502e+06	-0.0994482		614242	3.08086e+06	0.0678044
601882	3.07502e+06	-0.147497		614258	3.08086e+06	0.188713
601898	3.07502e+06	-0.176346		614272	3.08086e+06	0.285224
601912	3.07502e+06	-0.173274		614288	3.08086e+06	0.313109
601538	3.07501e+06	0.317294		614302	3.08086e+06	0.330402
601552	3.07501e+06	0.284713		614318	3.08086e+06	0.265187
601568	3.07501e+06	0.27845		614332	3.08086e+06	0.132967
601582	3.07501e+06	0.26135		614348	3.08086e+06	0.0602343
601598	3.07501e+06	0.159143		614362	3.08086e+06	-0.0398179
601612	3.07501e+06	0.0974157		614378	3.08086e+06	-0.109745
601628	3.07501e+06	0.090083		614392	3.08086e+06	-0.114366
[truncated: 100,398 more rows]

## Sheet: fig2b
off-glacier displacement					glacier flow velocity
Easting_UTM45N (m)	Northing_UTM45N (m)	Velocity (m a-1)	Angle (degree)		Easting_UTM45N (m)	Northing_UTM45N (m)	Velocity (m a-1)	Angle (degree)
610300	3082500	0	0		614200	3081200	11.7948	-91.2314
610100	3082100	0	0		614400	3081200	10.1577	-89.8755
614700	3080500	2.20708	-156.634		610600	3081000	47.114	-86.0015
615100	3080500	1.90251	-169.031		614200	3081000	12.5356	-89.5727
615500	3080500	2.5158	-158.892		614400	3081000	9.79176	-84.2605
613700	3080300	4.05196	-178.127		610400	3080800	47.4864	-80.8836
614700	3080300	2.31632	-154.851		610800	3080800	28.3379	-112.399
614900	3080300	3.29365	-159.713		614200	3080800	11.5207	-95.5261
615100	3080300	1.82147	168.462		614400	3080800	11.9029	-89.0423
615300	3080300	2.19797	-175.119		614200	3080600	9.97853	-107.152
615500	3080300	2.82815	-172.29		614400	3080600	8.54509	-95.7129
613700	3080100	2.66011	-169.148		610800	3080400	37.5647	-99.5498
614500	3080100	2.33968	-142.479		614000	3080400	8.19287	-109.285
614700	3080100	3.11109	-171.224		614200	3080400	10.2525	-105.909
614900	3080100	2.47916	-167.143		613800	3080200	6.20077	-123.247
615100	3080100	2.90829	-164.938		614000	3080200	9.22252	-114.713
615300	3080100	3.40344	-158.299		614200	3080200	9.04113	-116.024
611100	3079900	3.05357	-157.477		610600	3080000	31.53	-85.5303
612900	3079900	2.50663	-174.661		610800	3080000	28.5417	-78.8938
613100	3079900	1.91169	168.911		613800	3080000	3.6862	-137
613300	3079900	2.97422	-160.384		614000	3080000	3.74049	-131.376
613500	3079900	2.84073	-170.877		610800	3079800	25.0078	-63.1314
613700	3079900	2.44348	-165.847		614000	3079800	2.70015	-112.912
614300	3079900	1.85891	-156.676		610600	3079600	25.0582	-59.9118
614500	3079900	2.69729	-156.729		610800	3079600	24.4951	-59.6693
614700	3079900	2.78899	-155.26		611000	3079600	21.0431	-67.1016
614900	3079900	2.66497	-157.566		613600	3079600	12.8004	-164.079
615100	3079900	2.15003	-152.343		613800	3079600	18.5169	-165.309
615300	3079900	2.48556	-167.379		614000	3079600	2.89006	-122.819
611100	3079700	7.49821	-169.41		614600	3079600	26.0309	175.308
612900	3079700	2.75043	-178.506		616200	3079600	36.0518	171.697
613100	3079700	2.84215	-158.469		616600	3079600	33.6829	-152.644
613300	3079700	3.04286	-177.627		610600	3079400	25.1008	-56.3368
613500	3079700	3.11552	-149.43		610800	3079400	24.3624	-54.4331
613700	3079700	3.64122	-116.293		611000	3079400	19.2673	-65.9205
614500	3079700	2.54011	-155.614		613400	3079400	12.5181	-160.414
614700	3079700	3.28616	-152.863		613600	3079400	22.403	-160.422
614900	3079700	3.57172	-157.12		613800	3079400	22.8386	-160.864
615100	3079700	2.74359	-166.812		615400	3079400	25.7707	-162.248
615300	3079700	3.11039	-175.646		615600	3079400	27.4352	-166.345
611300	3079500	9.41602	159.841		616200	3079400	37.77	171.711
611900	3079500	2.7251	-177.497		610800	3079200	24.2706	-52.6362
612900	3079500	2.0428	171.558		611000	3079200	21.0383	-62.2267
613100	3079500	3.25368	-172.037		611200	3079200	16.8176	-57.7885
613300	3079500	3.13585	-141.17		613200	3079200	11.0432	-153.773
611900	3079300	3.43096	163.951		613400	3079200	13.8095	-152.586
612100	3079300	2.59193	-178.209		613600	3079200	19.6542	-153.444
612300	3079300	3.52695	165.014		613800	3079200	24.4843	-161.841
612500	3079300	2.98052	-164.328		614000	3079200	25.036	-163.523
612900	3079300	2.73038	173.223		615600	3079200	27.7861	-165.669
613100	3079300	4.22913	-137.637		616200	3079200	33.4981	178.335
611700	3079100	3.31866	116.833		611000	3079000	15.0908	-59.3037
612100	3079100	2.9919	166.318		611200	3079000	16.42	-56.7539
612300	3079100	2.44509	176.387		611400	3079000	15.869	-59.6196
612700	3079100	3.04326	179.48		613000	3079000	9.09442	-156.008
612900	3079100	2.32113	173.382		613200	3079000	11.2618	-149.227
611700	3078900	5.22432	158.256		616200	3079000	34.9517	-162.682
612100	3078900	3.09781	171.159		611200	3078800	14.6588	-58.2203
612300	3078900	2.7359	155.335		611400	3078800	13.8587	-67.0573
612500	3078900	3.76052	172.175		612800	3078800	4.07084	-79.0783
613700	3078900	6.16073	172.833		613000	3078800	5.53032	-122.869
613900	3078900	6.60064	-177.046		613200	3078800	6.76026	-145.257
610700	3078700	1.26727	127.057		613400	3078800	10.0014	-148.98
610900	3078700	3.48592	161.455		611200	3078600	14.3843	-56.7184
611900	3078700	4.84907	154.154		611400	3078600	12.9982	-60.5453
612300	3078700	4.24779	167.409		611600	3078600	10.1449	-76.3582
610900	3078500	2.34614	-174.848		612400	3078600	4.81505	-88.8592
611100	3078500	2.81204	166.548		611400	3078400	9.86343	-66.714
610900	3078300	7.78841	83.5864		611600	3078400	9.35525	-71.9993
611100	3078300	1.92057	176.858		611800	3078400	8.30276	-58.6798
611300	3078300	2.54773	163.842		612200	3078400	3.04549	-84.775
613100	3078300	1.64373	-173.923		612400	3078400	3.73092	-75.7133
612900	3078100	2.34652	-152.665		611800	3078200	7.3981	-52.9488
613300	3078100	1.57782	-155.68		612000	3078200	4.98459	-59.9925
612500	3077900	2.04733	-160.898		612200	3078200	3.65719	-86.795
612700	3077900	2.69068	175.075		611800	3078000	5.29947	-63.3531
612900	3077900	2.4597	-126.643		612000	3078000	5.16105	-60.5342
613300	3077900	1.76772	-177.338		612200	3078000	3.0982	-90.8642
611500	3077700	2.67794	154.12		611800	3077800	4.36964	-68.5468
611700	3077700	1.79078	-174.546		612000	3077800	4.37196	-70.1114
612500	3077700	1.44121	174.072		612200	3077800	4.25209	-86.7327
612900	3077700	2.52556	-163.313		612000	3077600	3.92406	-85.7762
613100	3077700	2.73111	171.455		612000	3077400	4.65771	-64.5146
613300	3077700	2.87766	-178.977		612200	3077400	3.45516	-91.1428
613500	3077700	2.08125	-165.906		612000	3077200	4.32214	-77.2576
614100	3077700	2.62148	-168.982		612200	3077200	4.14228	-80.826
607300	3077500	1.9637	49.9329		612000	3077000	4.48878	-84.1615
611300	3077500	1.79207	175.441		612200	3077000	4.07869	-83.5089
611500	3077500	2.03896	166.624		612400	3077000	4.31116	-97.5127
611700	3077500	2.29246	137.647		612000	3076800	3.96725	-81.7921
612500	3077500	3.04127	-169.097		612200	3076800	4.51935	-91.6475
612900	3077500	1.94748	168.298		612400	3076800	4.69116	-116.507
613100	3077500	2.59032	-176.104		612000	3076600	3.8485	-82.5581
613300	3077500	3.9661	-166.617		612200	3076600	4.2977	-113.275
613500	3077500	2.94194	-173.788		612400	3076600	4.47158	-117.194
613900	3077500	2.81771	-160.907		612000	3076400	3.8815	-85.5405
614100	3077500	3.0096	179.806		612200	3076400	4.11157	-112.312
614300	3077500	3.71118	-155.007		612400	3076400	4.17689	-114.638
614500	3077500	2.58882	-157.732		612000	3076200	3.8758	-80.3095
606500	3077300	0.083043	-62.5092		612200	3076200	3.95985	-94.3313
606700	3077300	1.30279	-164.63		612400	3076200	4.60024	-110.491
607300	3077300	1.11856	-66.3225		612200	3076000	4.12324	-96.499
607700	3077300	0.808155	-155.094		612400	3076000	3.68595	-97.3744
611300	3077300	1.58542	168.175		612200	3075800	3.28761	-67.0192
611500	3077300	2.34201	171.608		612400	3075800	2.99863	-80.8068
612700	3077300	2.23654	154.411		612200	3075600	3.28761	-67.0192
612900	3077300	1.96659	166.207		612400	3075600	3.58876	-63.5238
613100	3077300	2.42411	-177.805		612200	3075400	3.54555	-94.7478
613300	3077300	4.59521	-136.637		612400	3075400	4.8	-99.9502
613500	3077300	5.67542	-113.994		612600	3075400	4.58749	-106.039
613700	3077300	5.52196	-101.519		612200	3075200	4.66989	-85.8148
613900	3077300	6.0907	-86.6209		612400	3075200	4.91963	-91.0945
607300	3077100	2.4086	-154.129		612600	3075200	5.01948	-90.4013
607700	3077100	3.59691	176.051		612400	3075000	5.42451	-95.8133
611500	3077100	2.88961	162.165		612600	3075000	5.37298	-98.7705
612700	3077100	3.4227	168.401		612200	3074800	4.25055	-89.4571
612900	3077100	2.06091	-172.084		612400	3074800	5.46816	-97.3266
613100	3077100	2.41784	-169.858		612600	3074800	5.68386	-101.316
613300	3077100	3.09022	-160.697		612400	3074600	6.16615	-92.3302
613500	3077100	5.1756	-85.7662		615200	3074600	39.1935	-153.46
613700	3077100	6.60289	-90.7555		612400	3074400	7.06981	-95.6583
613900	3077100	6.34103	-91.6978		612600	3074400	7.52024	-96.5566
607100	3076900	1.96828	156.762		614800	3074400	40.1354	-161.414
607300	3076900	2.25958	153.987		604400	3074200	7.79007	-162.795
607500	3076900	2.4307	177.107		605400	3074200	2.93581	152.849
608500	3076900	2.97395	-164.182		612200	3074200	6.63854	-103.301
612500	3076900	2.02926	-170.187		612400	3074200	6.99327	-96.6046
612700	3076900	2.0588	179.579		612600	3074200	5.96894	-87.558
612900	3076900	2.58768	-168.8		602000	3074000	3.52911	-122.558
613100	3076900	0.878037	153.192		602400	3074000	2.52083	176.462
613500	3076900	1.02594	-116.983		602800	3074000	4.70058	158.73
607100	3076700	2.3732	-174.654		603000	3074000	4.33278	-168.848
607500	3076700	3.06108	170.705		603200	3074000	4.92848	-159.742
608500	3076700	1.43061	158.944		603400	3074000	4.44284	-173.514
609900	3076700	1.20037	162.818		603600	3074000	5.10721	170.91
611700	3076700	1.81187	173.605		603800	3074000	4.56185	173.796
612500	3076700	3.63083	-122.167		604400	3074000	7.79007	-162.795
612900	3076700	1.80501	-174.489		604600	3074000	7.79007	-162.795
605700	3076500	1.13922	173.484		605200	3074000	6.65627	145.232
607100	3076500	2.19142	175.096		606400	3074000	3.39512	-167.015
607300	3076500	2.73764	163.452		606600	3074000	3.3943	-161.5
607500	3076500	2.24962	150.566		606800	3074000	2.82281	-157.165
608500	3076500	1.88445	161.831		612000	3074000	4.25184	-92.5803
610100	3076500	2.83883	163.037		612200	3074000	6.98013	-108.553
612700	3076500	3.25894	-161.105		612400	3074000	7.11232	-101.861
613300	3076500	2.08054	140.03		612600	3074000	7.32373	-94.266
605700	3076300	2.0337	138.953		613800	3074000	37.9909	-131.474
607100	3076300	1.93853	168.225		601800	3073800	2.36562	-117.402
607300	3076300	3.07685	-166.603		602400	3073800	2.83934	162.519
607500	3076300	2.24341	147.982		602600	3073800	2.90105	-174.281
607700	3076300	6.57323	-175.578		603000	3073800	6.50994	-160.98
608100	3076300	2.5855	-161.351		603200	3073800	6.61351	-161.606
608300	3076300	1.88012	177.549		603400	3073800	5.18051	-176.098
608500	3076300	2.76225	135.829		603600	3073800	4.61978	170.269
608700	3076300	0.84582	172.719		605400	3073800	8.67136	147.689
613300	3076300	1.9273	-139.066		606600	3073800	4.66624	178.787
604900	3076100	1.33	169.696		606800	3073800	5.34707	-167.767
605100	3076100	2.38039	-179.883		607200	3073800	3.29022	-176.567
605700	3076100	2.19887	-174.3		607400	3073800	6.07929	-172.441
606500	3076100	1.09395	139.581		607600	3073800	4.98111	-179.413
606900	3076100	2.02669	-163.577		608000	3073800	7.51759	169.01
607100	3076100	2.77494	169.241		608200	3073800	7.3656	176.689
607500	3076100	2.38968	174.292		608400	3073800	6.1641	-179.202
607700	3076100	5.68076	176.678		608800	3073800	7.74116	-168.965
608100	3076100	2.75641	177.962		609000	3073800	6.57137	-166.336
608300	3076100	1.38533	168.29		609200	3073800	7.35236	-167.951
608500	3076100	2.08739	166.155		611800	3073800	5.49875	-115.316
611700	3076100	2.1363	169.645		612000	3073800	9.70741	-134.845
603100	3075900	0.012903	103.749		612200	3073800	8.62624	-133.426
603300	3075900	0.004031	-23.3852		612400	3073800	10.4857	-162.173
603700	3075900	2.82148	-165.236		613400	3073800	36.444	-130.918
603900	3075900	1.05733	-50.8536		613600	3073800	36.57	-130.713
604100	3075900	1.30458	179.352		601800	3073600	1.62025	-113.303
604300	3075900	3.08517	141.188		602000	3073600	4.96076	-109.501
604700	3075900	1.1797	122.234		607000	3073600	3.60891	162.77
605100	3075900	0.771119	-157.789		607200	3073600	5.89464	165.02
605700	3075900	2.12419	141.917		607400	3073600	6.17369	-179.466
605900	3075900	1.30547	161.464		607600	3073600	6.24788	-178.847
606500	3075900	0.949202	150.181		607800	3073600	6.58654	177.361
606700	3075900	0.990888	143.462		608000	3073600	7.25684	169.82
606900	3075900	2.69311	-177.734		608200	3073600	7.238	179.241
607100	3075900	2.08568	155.891		608400	3073600	7.51738	-175.828
607300	3075900	2.3689	162.141		608600	3073600	7.53143	-176.06
607500	3075900	3.30668	173.083		608800	3073600	8.11637	-167.85
607700	3075900	3.85655	171.63		609000	3073600	10.6552	-176.124
608500	3075900	2.57582	173.116		609200	3073600	11.6711	-175.657
608900	3075900	2.75179	172.84		609400	3073600	10.9302	-177.189
609300	3075900	1.55534	176.707		609600	3073600	9.72196	176.797
609500	3075900	4.84206	-148.393		609800	3073600	9.75292	178.813
611300	3075900	3.00622	158.95		610000	3073600	8.41072	-172.689
611500	3075900	1.92604	-166.878		610200	3073600	8.50882	-159.063
611700	3075900	3.36776	131.578		611400	3073600	8.0929	-139.05
603100	3075700	0.003726	-79.6952		611600	3073600	10.838	-140.15
603500	3075700	2.33466	170.35		611800	3073600	12.2748	-140.082
603900	3075700	5.39089	-165.879		612000	3073600	15.3262	-148.719
604100	3075700	2.81775	-177.142		612200	3073600	16.842	-158.307
604300	3075700	2.93666	165.259		612400	3073600	15.6205	-170.702
604500	3075700	1.46789	137.563		612600	3073600	19.4144	168.557
604700	3075700	1.00355	178.587		612800	3073600	21.3966	165.465
605100	3075700	0.442642	108.897		613000	3073600	22.1439	169.503
605700	3075700	1.99749	150.586		613200	3073600	24.2613	172.263
605900	3075700	0.895555	166.46		613400	3073600	32.3756	-151.637
606100	3075700	2.03564	-179.46		613600	3073600	36.7724	-131.244
606500	3075700	2.30806	-169.771		601400	3073400	2.87342	-130.821
606700	3075700	1.87963	-158.055		601600	3073400	2.04465	-114.99
606900	3075700	1.89419	154.806		601800	3073400	1.65381	-115.065
607100	3075700	2.1591	156.946		607000	3073400	3.37151	163.744
607500	3075700	2.45459	171.882		607200	3073400	3.35585	173.945
607700	3075700	2.7144	167.319		607600	3073400	5.0649	-179.255
607900	3075700	2.41179	158.485		607800	3073400	7.07835	-174.735
608100	3075700	2.48738	-177.166		609200	3073400	13.5286	-179.337
608300	3075700	3.51924	-170.211		609400	3073400	12.7121	-178.522
608500	3075700	3.46903	179.346		609600	3073400	12.4121	175.657
608900	3075700	2.29826	-172.226		609800	3073400	12.9786	177.676
609300	3075700	2.26378	168.228		610000	3073400	12.2148	-177.484
609500	3075700	4.0379	-141.135		610200	3073400	11.6153	174.64
609700	3075700	3.34842	-163.136		610400	3073400	11.0546	169.312
610100	3075700	2.37866	163.769		610600	3073400	9.14869	178.819
611500	3075700	2.38343	149.835		610800	3073400	7.10608	-179.381
611700	3075700	1.29596	145.3		611000	3073400	7.29081	-158.311
611900	3075700	1.85174	-173.656		611200	3073400	8.79674	-151.854
612100	3075700	1.45863	172.729		611400	3073400	10.3115	-143.922
612700	3075700	3.0339	-159.711		611600	3073400	14.8945	-143.49
602900	3075500	1.78386	158.788		611800	3073400	15.5675	-145.098
603100	3075500	1.86756	131.727		612000	3073400	15.1264	-148.912
603300	3075500	1.98468	156.477		612400	3073400	18.5931	-178.06
603900	3075500	6.61059	-170.831		612600	3073400	20.118	167.607
604100	3075500	7.34738	161.207		612800	3073400	21.0612	166.52
604900	3075500	1.30072	156.7		613000	3073400	23.898	166.915
605100	3075500	1.09913	113.286		613200	3073400	24.6419	174.962
605700	3075500	1.33751	149.581		613400	3073400	28.8298	-176.431
605900	3075500	1.0323	-148.362		601200	3073200	1.54186	-91.7307
606100	3075500	4.05189	121.648		601400	3073200	2.84817	-103.579
606500	3075500	2.35555	157.939		601600	3073200	2.44669	-100.722
606700	3075500	0.87811	165.682		609400	3073200	15.1138	-177.376
606900	3075500	2.22576	-179.477		609600	3073200	12.9212	172.584
607100	3075500	1.47633	136.191		609800	3073200	13.5632	175.255
607500	3075500	2.48615	158.498		610000	3073200	13.2098	175.647
607700	3075500	2.91819	162.747		610200	3073200	12.6303	169.595
607900	3075500	2.84869	170.676		610400	3073200	12.1988	166.964
608300	3075500	3.70781	-175.499		610600	3073200	11.7017	167.673
608700	3075500	2.64326	173.199		610800	3073200	10.4017	176.819
608900	3075500	1.15529	-170.4		611000	3073200	10.539	-172.347
609100	3075500	2.61178	97.4468		611200	3073200	10.7272	-151.349
609300	3075500	1.90464	-172.033		611400	3073200	13.2066	-148.04
609500	3075500	2.20879	150.636		611600	3073200	15.0094	-143.852
609900	3075500	3.70914	-169.682		613000	3073200	19.8748	168.097
610100	3075500	2.17878	174.33		613200	3073200	21.4979	164.285
610900	3075500	1.17189	-159.49		613400	3073200	22.4592	162.372
611500	3075500	2.74805	163.603		601000	3073000	1.74108	-93.5168
611700	3075500	1.61526	171.617		610000	3073000	11.3754	-173.797
611900	3075500	1.67085	161.154		610600	3073000	12.2364	157.681
612100	3075500	2.07629	175.353		610800	3073000	11.1988	160.93
602900	3075300	1.35397	163.002		611000	3073000	10.6955	177.772
603100	3075300	2.10429	140.555		611200	3073000	12.8908	-159.087
603300	3075300	2.47673	138.194		611400	3073000	13.97	-154.975
603500	3075300	0.7928	61.1396		613200	3073000	18.655	159.69
603700	3075300	2.09397	-144.907		613400	3073000	32.1949	115.951
603900	3075300	7.17743	-164.749		610200	3072800	9.26424	142.339
604900	3075300	2.08558	137.369		610800	3072800	8.5892	147.05
605100	3075300	1.69108	146.174		611000	3072800	5.65067	156.076
605300	3075300	3.04957	154.752		613400	3072800	42.13	113.253
605900	3075300	2.4944	170.567		613600	3072800	45.6483	113.541
606100	3075300	2.82391	147.379		600400	3072600	2.14931	-85.364
606300	3075300	2.33222	160.482		610800	3072600	14.9397	90.2493
606500	3075300	1.77103	179.665		611000	3072600	4.61414	114.028
606900	3075300	3.26462	-156.392		600200	3072400	3.35836	-90.3945
607100	3075300	3.21664	167.941		613600	3072400	51.75	135.081
607300	3075300	3.94374	168.815		613800	3072400	51.2264	136.511
607500	3075300	3.41893	151.043		599800	3072200	3.0158	-83.7393
607700	3075300	3.77419	176.452		600000	3072200	2.91109	-110.959
607900	3075300	4.06129	171.831		614000	3072200	57.0579	136.112
608300	3075300	2.74439	-172.962		614200	3072200	58.8713	138.163
608500	3075300	2.94721	-176.382		599600	3072000	2.98375	-97.4314
608700	3075300	2.80893	167.946		599800	3072000	3.30216	-99.4502
608900	3075300	2.04059	-179.282		610800	3072000	30.4888	102.428
609100	3075300	1.8657	171.623		614000	3072000	58.663	138.509
609300	3075300	2.52889	-176.622		614200	3072000	59.7838	138.878
609500	3075300	2.6073	-170.039		614400	3072000	59.8773	137.291
609700	3075300	1.64542	-179.321		610600	3071800	28.3349	86.0938
609900	3075300	3.1324	179.356		614200	3071800	59.8302	138.397
610100	3075300	2.54484	-173.11		610600	3071600	29.8736	80.833
610900	3075300	1.67526	176.496		610800	3071600	38.1064	87.0261
611100	3075300	2.25476	141.043		614600	3071600	59.5383	129.7
611500	3075300	2.91061	173.875		614800	3071600	60.9452	128.037
611700	3075300	1.80532	168.864		610800	3071400	39.5043	73.4217
611900	3075300	1.3112	166.552		614800	3071400	61.7387	129.46
612100	3075300	2.17027	-162.639		610800	3071200	47.0915	88.9164
612700	3075300	1.47129	-147.509
602900	3075100	0.967387	159.592
603100	3075100	2.04398	131.423
603300	3075100	1.98558	92.1136
603500	3075100	2.76901	-148.61
603700	3075100	0.330194	-149.986
603900	3075100	2.17755	166.98
604100	3075100	2.51247	175.419
604300	3075100	2.06375	177.643
604900	3075100	5.29767	173.803
605100	3075100	6.34589	-170.192
605300	3075100	1.91224	179.604
606300	3075100	2.68026	154.402
606500	3075100	1.76322	169.436
606900	3075100	3.39796	150.574
607100	3075100	3.59778	153.274
607300	3075100	2.38687	179.982
607500	3075100	2.67144	171.755
607700	3075100	2.87513	-179.459
607900	3075100	3.31578	175.001
608100	3075100	3.9712	-176.099
608300	3075100	2.95192	179.573
608700	3075100	2.86487	163.126
608900	3075100	2.61827	-156.011
609100	3075100	2.01299	-175.258
609300	3075100	3.21624	174.241
609700	3075100	2.51826	-164.316
609900	3075100	2.75504	173.814
610100	3075100	2.8812	-176.428
610900	3075100	2.69664	-173.558
611100	3075100	1.84042	-163.75
611300	3075100	1.4033	172.486
611900	3075100	2.23962	174.973
612100	3075100	3.03177	166.723
613300	3075100	0.944537	164.085
613500	3075100	3.4388	-157.12
613900	3075100	1.54072	-155.344
614100	3075100	1.67649	-173.856
614300	3075100	4.11524	177.298
614500	3075100	3.20901	-159.006
614700	3075100	2.02819	-166.543
614900	3075100	2.53815	-173.293
603100	3074900	2.60869	-171.796
603900	3074900	5.59928	-174.736
604100	3074900	5.10398	167.275
604500	3074900	5.98675	174.812
604700	3074900	4.73132	-167.888
604900	3074900	6.25718	-175.316
605100	3074900	5.4002	-174.048
605300	3074900	3.47715	112.144
606300	3074900	1.64952	168.216
607100	3074900	2.82378	173.901
607300	3074900	2.88634	167.786
607500	3074900	2.33307	-179.558
607700	3074900	2.65465	177.175
607900	3074900	2.54964	-177.1
608100	3074900	1.94862	170.111
608300	3074900	2.5538	169.62
608500	3074900	2.87333	-173.704
608700	3074900	2.22037	-176.704
608900	3074900	2.22881	-173.619
609100	3074900	2.23563	-167.609
609300	3074900	2.87954	-176.568
609500	3074900	2.79021	-174.457
609700	3074900	3.43061	-166.759
609900	3074900	3.47426	-176.07
610100	3074900	2.7671	-179.51
610500	3074900	14.9709	-155.137
610900	3074900	1.77038	-167.028
611100	3074900	0.884331	159.687
611300	3074900	2.57729	178.493
611700	3074900	2.57757	-147.722
612100	3074900	2.07385	147.781
613300	3074900	2.9926	-164.943
613500	3074900	2.50341	-171.246
613900	3074900	2.30021	-178.754
614100	3074900	3.61975	-168.133
614300	3074900	2.97085	-177.405
614500	3074900	1.62038	-79.8968
614700	3074900	1.80289	-167.226
614900	3074900	1.54829	-137.732
602900	3074700	2.38864	163.151
603100	3074700	1.08599	167.132
603300	3074700	2.23941	-176.903
603500	3074700	2.83644	177.291
603700	3074700	1.57879	150.165
603900	3074700	3.27362	67.2983
604100	3074700	0.769032	62.542
604300	3074700	4.74738	175.26
604500	3074700	2.12281	-176.168
604700	3074700	3.80209	-179.082
604900	3074700	2.76653	-176.781
606300	3074700	2.48939	173.688
606500	3074700	1.3033	112.777
606900	3074700	3.03726	167.8
607100	3074700	3.77214	170.272
607300	3074700	3.40901	170.494
607500	3074700	2.88175	173.011
607700	3074700	3.02379	167.525
607900	3074700	3.47684	167.64
608500	3074700	2.9531	149.374
608700	3074700	2.72382	-175.361
608900	3074700	2.27432	168.843
609100	3074700	2.54592	175.825
609300	3074700	1.59387	173.868
609500	3074700	2.94122	-173.073
609700	3074700	3.04896	-171.654
609900	3074700	2.60616	-177.482
610100	3074700	1.97718	179.918
610300	3074700	1.09457	-147.713
610500	3074700	1.94313	-171.745
610900	3074700	2.58233	-179.956
611100	3074700	2.01832	165.521
611300	3074700	2.39809	-179.502
611500	3074700	2.0229	179.439
612100	3074700	7.23189	-157.941
613100	3074700	3.43154	-176.793
613300	3074700	2.60125	-168.178
613500	3074700	3.33862	-163.035
613700	3074700	3.5518	162.099
613900	3074700	3.61524	176.857
614100	3074700	2.06171	169.758
614300	3074700	3.468	-159.683
614500	3074700	1.97866	143.57
602500	3074500	2.62683	158.388
602700	3074500	2.91517	171.625
602900	3074500	3.93341	171.607
603100	3074500	3.16441	-179.697
603300	3074500	2.59259	172.868
603500	3074500	2.06197	133.702
603700	3074500	3.28168	173.43
603900	3074500	2.72264	146.235
604100	3074500	2.21858	165.875
604300	3074500	2.29418	163.201
604500	3074500	2.58514	-173.984
604700	3074500	2.15872	162.248
604900	3074500	2.40112	164.789
605100	3074500	3.2728	160.326
605300	3074500	3.02877	166.979
605500	3074500	3.2356	167.459
605700	3074500	2.50531	-175.111
605900	3074500	3.12623	159.208
606100	3074500	3.39999	-179.554
606300	3074500	1.71571	158.644
606500	3074500	1.50856	143.386
606700	3074500	2.42348	154.971
606900	3074500	2.96389	170.783
607100	3074500	3.2654	176.159
607300	3074500	2.21455	-170.042
607500	3074500	2.29763	170.957
607700	3074500	2.72222	171.697
607900	3074500	3.04541	169.317
608100	3074500	3.53948	-173.133
608300	3074500	3.05422	169.248
608500	3074500	3.45065	161.82
608700	3074500	2.20742	-178.44
608900	3074500	2.52093	173.974
609100	3074500	2.30394	170.967
609300	3074500	4.49381	-176.514
609500	3074500	2.94115	-168.686
609900	3074500	2.69807	-175.235
610100	3074500	1.92918	-178.193
610300	3074500	1.58758	-175.281
610500	3074500	2.71121	-170.625
610700	3074500	2.78259	-177.599
610900	3074500	2.85269	175.307
611100	3074500	2.80788	-178.671
611500	3074500	2.04887	163.403
611700	3074500	2.44093	-177.949
611900	3074500	2.13508	179.517
612100	3074500	4.71307	142.575
612900	3074500	1.2347	174.59
613100	3074500	2.36513	-173.024
613300	3074500	2.34965	167.931
613500	3074500	1.43465	-163.04
613700	3074500	4.33033	-154.125
613900	3074500	2.38836	-174.06
614100	3074500	8.83732	-140.321
601700	3074300	1.35152	-161.372
601900	3074300	1.37842	-161.461
602100	3074300	1.48216	145.263
602300	3074300	2.64896	-177.861
602500	3074300	2.54972	170.03
602700	3074300	2.03209	156.396
602900	3074300	2.49283	157.422
603100	3074300	2.13391	168.787
603300	3074300	2.37747	169.822
603500	3074300	2.38542	148.99
603700	3074300	2.19672	157.205
603900	3074300	1.79775	145.753
604100	3074300	2.6741	170.814
604300	3074300	2.11456	161.586
604500	3074300	1.54006	94.958
604700	3074300	0.45465	167.175
604900	3074300	3.19308	173.915
605100	3074300	3.85144	177.794
605300	3074300	3.7181	-178.167
605500	3074300	4.11828	-179.571
605700	3074300	4.04136	177.189
605900	3074300	3.42458	-173.915
606100	3074300	3.01641	-176.336
606300	3074300	2.84154	167.893
606500	3074300	2.56288	170.269
606700	3074300	2.91634	158.365
606900	3074300	2.04346	165.874
607100	3074300	2.29648	-176.545
607300	3074300	2.53953	167.455
607500	3074300	2.93155	177.208
607700	3074300	2.34282	179.158
607900	3074300	2.65907	178.94
608100	3074300	2.94289	172.758
608300	3074300	3.58305	179.531
608500	3074300	2.69909	-168.865
608700	3074300	3.18905	175.143
608900	3074300	2.92295	179.724
609100	3074300	2.48883	-176.352
609300	3074300	2.41941	177.444
609500	3074300	4.40278	-177.329
609700	3074300	2.45958	-174.698
609900	3074300	2.80529	168.564
610100	3074300	2.49564	177.628
610300	3074300	2.47505	-163.952
610500	3074300	1.62695	-162.619
610700	3074300	2.4933	-173.246
610900	3074300	2.2464	166.869
611100	3074300	2.23817	-176.106
611300	3074300	2.25963	169.073
611500	3074300	2.05172	178.274
611700	3074300	2.48277	173.488
611900	3074300	2.80327	-163.839
612100	3074300	4.62088	164.37
613100	3074300	2.38106	171.827
613300	3074300	1.88973	177.197
613900	3074300	0.965735	-156.945
601500	3074100	1.21886	160.695
601700	3074100	2.01027	163.415
601900	3074100	2.99186	-173.295
607300	3074100	2.98164	-178.809
607500	3074100	3.45097	169.142
607700	3074100	3.29582	170.234
607900	3074100	3.28544	172.839
608100	3074100	3.50066	-177.608
608300	3074100	3.64667	175.991
608500	3074100	4.3517	177.217
608700	3074100	5.0068	175.562
608900	3074100	4.48206	-178.036
609100	3074100	3.74634	178.375
609300	3074100	2.56292	-173.814
609500	3074100	3.23968	-168.203
609700	3074100	3.56914	-163.727
609900	3074100	4.2582	-171.864
610100	3074100	3.51692	-175.414
610300	3074100	2.43382	179.349
610500	3074100	3.25814	-164.364
611300	3074100	2.75529	176.641
611500	3074100	1.90034	-178.076
611700	3074100	1.45862	173.721
612100	3074100	5.3359	156.403
612900	3074100	2.71216	171.707
613100	3074100	2.07842	-163.638
601300	3073900	1.40625	-179.74
601500	3073900	2.15223	162.095
607700	3073900	2.01059	-142.175
607900	3073900	3.47986	-168.215
608100	3073900	3.81528	-177.394
608300	3073900	4.01179	-173.79
608500	3073900	4.53718	173.813
608700	3073900	3.65727	-171.046
608900	3073900	3.65404	161.559
609100	3073900	3.366	171.062
609300	3073900	5.40744	-172.405
609500	3073900	6.4367	-170.099
609700	3073900	6.34322	-179.241
609900	3073900	5.76867	-163.142
610100	3073900	4.58034	-175.245
610300	3073900	3.49831	-173.363
610500	3073900	1.55727	164.748
610700	3073900	1.90989	164.377
610900	3073900	2.6471	-171.424
611100	3073900	2.61651	171.735
611300	3073900	2.38368	169.352
611500	3073900	1.27993	152.979
611700	3073900	3.61687	-178.465
611900	3073900	4.13572	-176.692
613300	3073900	1.96132	173.024
614500	3073900	2.14256	154.739
600900	3073700	1.89352	-39.3135
601100	3073700	1.58767	-178.093
601300	3073700	1.70234	-176.647
609500	3073700	6.63842	-149.751
609700	3073700	5.98765	-171.225
609900	3073700	6.13906	-142.483
610100	3073700	5.49743	-167.321
610300	3073700	4.49602	-177.395
610500	3073700	3.01985	179.225
610700	3073700	1.94319	168.946
610900	3073700	2.18048	152.612
611100	3073700	1.47095	159.522
611300	3073700	1.98262	170.299
600900	3073500	1.35724	-178.717
601100	3073500	1.55723	161.43
602300	3073500	2.46204	-105.767
602500	3073500	3.76843	156.258
602700	3073500	5.40146	141.774
602900	3073500	4.83364	-134.701
603100	3073500	6.64358	-169.869
603900	3073500	3.60221	-170.186
605300	3073500	12.0042	150.058
605700	3073500	3.26401	172.903
605900	3073500	5.94263	177.738
606100	3073500	4.93938	170.413
600500	3073300	2.10767	-154.008
600700	3073300	1.15836	173.149
600900	3073300	2.05506	-177.082
603500	3073300	2.62533	-105.549
603700	3073300	1.55982	102.643
604100	3073300	8.8788	-169.521
604300	3073300	2.2042	-150.351
605500	3073300	6.02052	-167.971
606900	3073300	0	0
613700	3073300	1.3283	138.968
600300	3073100	1.67111	161.437
600500	3073100	1.69881	177.559
600700	3073100	1.98175	175.209
601700	3073100	1.65435	164.252
603900	3073100	7.98206	-172.793
604100	3073100	4.9088	-137.879
600100	3072900	1.72157	168.13
600300	3072900	1.92555	-173.038
600500	3072900	1.97363	-177.83
601300	3072900	2.82617	149.193
601500	3072900	1.54276	155.184
601700	3072900	2.33808	153.336
601900	3072900	1.78264	-172.689
607900	3072900	6.10734	116.847
608100	3072900	1.77955	147.658
608300	3072900	8.83111	-161.757
608500	3072900	5.20472	167.043
608700	3072900	8.08777	175.779
608900	3072900	0	0
609100	3072900	10.022	157.568
609500	3072900	6.36686	164.574
599900	3072700	2.82962	177.063
600100	3072700	1.78422	168.73
600300	3072700	2.34126	-177.215
601100	3072700	1.18783	-150.812
601300	3072700	1.31224	142.169
601500	3072700	0.625499	163.39
603500	3072700	2.55595	164.726
603700	3072700	3.556	160.402
610100	3072700	7.97409	-68.1019
614300	3072700	2.76778	-156.627
599500	3072500	2.99044	175.856
599700	3072500	2.6266	-179.269
599900	3072500	3.23729	179.896
600900	3072500	1.55041	161.121
601100	3072500	0.790341	112.947
601300	3072500	1.65485	161.595
609500	3072500	3.34425	150.476
610300	3072500	1.29434	-169.944
611700	3072500	2.02553	-179.668
611900	3072500	3.37731	-155.021
612300	3072500	1.90183	-165.113
612500	3072500	2.26168	148.753
612700	3072500	3.04105	88.7522
612900	3072500	3.80027	86.797
613100	3072500	1.12633	128.783
613300	3072500	1.48515	-70.7659
614500	3072500	2.45881	-175.841
614900	3072500	2.2587	-164.542
599300	3072300	1.32476	169.191
599500	3072300	2.13475	168.799
600700	3072300	1.18586	166.825
600900	3072300	0.772123	144.057
601100	3072300	0.468671	-129.79
609900	3072300	2.04344	153.113
610300	3072300	1.57011	-157.698
611500	3072300	2.85096	178.567
611700	3072300	0.961879	179.062
611900	3072300	0.396654	-177.851
612100	3072300	1.67771	-136.962
612300	3072300	1.20583	-167.41
612500	3072300	1.33977	-161.939
612700	3072300	5.4622	69.5325
612900	3072300	6.01453	82.1384
614300	3072300	3.88743	-112.889
616300	3072300	0.003535	98.1301
599100	3072100	0.918544	-159.973
599300	3072100	2.22521	175.855
599500	3072100	2.24387	177.078
600300	3072100	0.079314	168.362
609300	3072100	2.18115	-153.956
609900	3072100	1.53179	163.212
610100	3072100	1.1875	157.66
610300	3072100	1.09587	124.281
611300	3072100	2.74039	-160.987
611500	3072100	2.5071	174.369
611700	3072100	0.191162	37.1336
611900	3072100	0.624768	90.4356
612300	3072100	1.44634	-165.479
614700	3072100	5.36399	-122.331
614900	3072100	5.37492	-108.882
599100	3071900	2.84627	179.206
599300	3071900	1.01452	164.493
599500	3071900	2.31867	172.054
599700	3071900	0.840297	-152.949
599900	3071900	1.17255	162.506
600100	3071900	1.16921	131.072
609900	3071900	1.33826	119.423
610100	3071900	2.7103	-176.715
610300	3071900	2.34861	174.552
611100	3071900	1.38582	137.252
611300	3071900	2.31238	178.339
613500	3071900	1.58232	170.06
614900	3071900	9.56251	-126.381
615100	3071900	11.9115	-123.149
615300	3071900	16.7878	-92.2787
599100	3071700	1.35472	-175.173
599300	3071700	1.82775	169.78
599500	3071700	1.34959	166.009
599700	3071700	0.42714	143.457
608500	3071700	1.90397	138.957
608700	3071700	2.22504	134.86
608900	3071700	4.46304	118.969
609100	3071700	3.0216	112.155
609300	3071700	2.52784	165.445
609700	3071700	1.23826	-174.352
609900	3071700	1.64636	139.842
610100	3071700	0.261023	144.827
611100	3071700	1.7767	170.137
611300	3071700	1.88426	-162.042
614900	3071700	6.12303	-126.228
599100	3071500	1.93569	-170.534
599300	3071500	1.42211	-175.513
609500	3071500	2.30655	155.463
609700	3071500	2.62148	174.044
609900	3071500	2.08613	178.589
610100	3071500	1.16975	132.935
610300	3071500	1.70225	179.024
611300	3071500	2.06906	-164.11
609500	3071300	2.39847	154.859
609700	3071300	2.4106	169.302
609900	3071300	2.8945	168.131
610100	3071300	2.34616	167.012
610300	3071300	1.73012	-170.916
611100	3071300	1.42049	-168.371
609900	3071100	1.75201	165.158
610100	3071100	0.917992	160.681
610300	3071100	2.16155	-162.833
611100	3071100	2.59115	-151.937
611700	3071100	2.4403	173.687
610100	3070900	2.29038	171.344
611100	3070900	2.81229	173.382
611300	3070900	7.01426	-85.0153
611500	3070900	9.43575	-82.1595
611700	3070900	3.46227	-148.852
610100	3070700	0.94549	158.426
611100	3070700	1.49465	-140.436
610100	3070500	0.629038	-163.956
611100	3070500	4.61501	160.911
611500	3070500	1.36546	-125.281
609900	3070300	4.34682	114.633
610100	3070300	3.30005	176.436
610300	3070300	1.96967	160.556
608900	3070100	2.09685	-132.062
609300	3070100	1.11331	145.91
609500	3070100	1.47781	149.618
609700	3070100	2.06585	-179.91
609900	3070100	2.06616	-153.125
610100	3070100	2.05734	159.571
610300	3070100	1.33026	-171.033
609300	3069900	2.06222	140.62
609500	3069900	1.58607	-172.073
609700	3069900	1.94598	-174.343
609900	3069900	3.44507	97.1869
610100	3069900	2.39371	124.29
608700	3069700	1.53566	-155.591
608900	3069700	2.30113	-175.28
609300	3069700	1.0118	-167.461
611300	3069700	0.927235	-112.444
611900	3069700	1.52051	172.644
608900	3069500	1.52891	137.383
611500	3069500	1.13916	-165.467
610900	3067700	2.92963	27.5937

## Sheet: fig3
rate of elevation change (dh/dt)											hypsometry
Elevation (m asl)	dh/dt of debris-covered area (m a-1)	s.d. of dh/dt of debris-covered area (m a-1)	dh/dt of debris-free area (m a-1)	s.d. of dh/dt of debris-free area (m a-1)	Elevation (m asl)	dh/dt of point site (m a-1)	Lower bound of fitting curve (m a-1)	Fitting curve (m a-1)	Upper bound of fitting curve (m a-1)		Elevation (m asl)	Debris area (km2)	Debris-free area (km2)	Unmeasured area (km2)
4575	-0.16689	0.24255			6016	-0.045					4575	0.810175
4625	-0.4227	0.34956			6080	0.015					4625	0.756425
4675	-0.47049	0.36431			6105	0.058					4675	0.38195
4725	-0.47749	0.38002			6169	0.017					4725	0.34855
4775	-0.77222	0.42984			6247	-0.06					4775	0.5982
4825	-0.61976	0.40071			6295	0.107					4825	0.74345
4875	-0.81958	0.39177			6919	-0.02					4875	0.933625
4925	-0.87909	0.31745			7078	0.077					4925	0.9517
4975	-0.77907	0.30285			7164	-0.107					4975	0.9234
5025	-0.7044	0.39426									5025	0.87585
5075	-0.70273	0.28282									5075	1.17135
5125	-0.79535	0.36312									5125	1.1
5175	-0.77847	0.33043	-0.4586	0.11472							5175	0.922275	0.1037
5225	-0.83978	0.41615	-0.54364	0.21473							5225	0.598225	0.18965
5275	-0.83656	0.45915	-0.32829	0.15732							5275	0.801675	0.245	0.0072
5325	-0.82789	0.35061	-0.27875	0.13548							5325	0.61225	0.274775	0.0576
5375	-0.8261	0.40837	-0.23058	0.17256							5375	0.81615	0.521525	0.0675
5425	-0.97008	0.33108	-0.21276	0.24585							5425	0.365	0.768725	0.0882
5475	-0.91097	0.3147	-0.33439	0.37075							5475	0.292625	0.325125	0.2997
5525	-0.73271	0.20074	-0.26587	0.4127							5525	0.2254	0.533425	0.4086
5575	-0.51863	0.23157	-0.43799	0.32265							5575	0.228525	0.450675	0.6867
5625	-0.3533	0.25213	-0.52988	0.16856							5625	0.112875	0.42885	0.9558
5675	-0.095865	0.26836	-0.29712	0.16912							5675	0.12665	0.458225	1.197
5725	0.043364	0.24618	-0.15601	0.26553							5725	0.1808	0.4234	1.4724
5775	0.069344	0.30056	-0.13957	0.32231							5775	0.0979	0.8452	1.84365
5825	0.40144	0.04368	-0.0040101	0.19492							5825	0.00338	0.815595	2.65635
5875			0.079688	0.18406			-0.02	-0.01	0		5875	0.00168	0.41727	2.65455
5925			0.077095	0.19102			0.03702	0.05246	0.0557168		5925	0.00118	0.22167	2.7918
5975			0.11143	0.18223			0.0792614	0.102335	0.103673		5975		0.1897	2.6721
6025			0.18368	0.13616			0.110555	0.142162	0.144949		6025		0.261375	2.6703
6075			0.22386	0.07164			0.133737	0.173963	0.180475		6075		0.098845	2.63205
6125							0.150911	0.199358	0.211053		6125			2.3652
6175							0.163634	0.219636	0.237372		6175			1.68435
6225							0.17306	0.235828	0.260025		6225			1.38195
6275							0.180042	0.248757	0.279522		6275			0.9558
6325							0.185215	0.259082	0.296304		6325			0.8541
6375							0.189047	0.267326	0.310748		6375			0.6813
6425							0.191886	0.273909	0.32318		6425			0.6498
6475							0.193989	0.279166	0.33388		6475			0.55485
6525							0.195547	0.283364	0.34309		6525			0.3708
6575							0.196701	0.286716	0.351017		6575			0.3861
6625							0.197556	0.289392	0.35784		6625			0.39735
6675							0.198189	0.29153	0.363713		6675			0.2826
6725							0.198659	0.293236	0.368767		6725			0.18225
6775							0.199006	0.294599	0.373118		6775			0.15885
6825							0.199264	0.295687	0.376862		6825			0.22995
6875							0.199455	0.296556	0.380085		6875			0.1224
6925							0.199596	0.29725	0.382859		6925			0.19575
6975							0.199701	0.297804	0.385247		6975			0.1917
7025							0.199778	0.298247	0.387302		7025			0.42525
7075							0.199836	0.2986	0.389071		7075			0.504
7125							0.199878	0.298882	0.390593		7125			0.4923
7175							0.19991	0.299107	0.391903		7175			0.44325
7225							0.199933	0.299287	0.393031		7225			0.3969
7275							0.199951	0.299431	0.394002		7275			0.25605
7325							0.199963	0.299545	0.394837		7325			0.1089
7375							0.199973	0.299637	0.395556		7375			0.018
							0.200011	0.299741	0.396206

## Sheet: fig4
Elevation in 2010 (m asl)	Distance from terminus to up-glacier (km)	Pond size (km2)	dh/dt (m a-1)	S.D. of dh/dt (m a-1)
4565.66	0.84183	0.00100019	-0.670861	0.068156
4575.6	1.21293	0.00147902	-0.381664	0.141129
4592.23	2.57237	0.00187634	-1.01299	0.145
4593.4	2.33916	0.00156285	-0.86762	0.0999416
4751	5.08456	0.00556159	-0.981956	0.21922
4769.92	6.03535	0.0279185	-1.66199	0.219332
4818.12	6.83674	0.00149099	-1.5139	0.0665124
4845.21	7.43952	0.00127168	-0.789577	0.0413204
4876.54	8.40427	0.00163189	-1.80774	0.0467651
4891.18	8.35498	0.00600492	-1.10812	0.0513287
4907.29	9.13618	0.00383987	-1.34558	0.0673453
4917.22	9.29999	0.00175065	-1.56482	0.116062
4942.96	9.6701	0.00763988	-1.44277	0.127952
4947.2	10.061	0.0153818	-1.35839	0.126912
4972.15	10.3288	0.00101293	-0.887883	0.0419121
4983.43	10.4146	0.00135319	-1.12055	0.0651081
5049.21	12.1317	0.00644925	-1.2539	0.0879607
5092.31	12.7737	0.0027453	-1.06788	0.0514551
5098.01	13.0493	0.00122928	-1.14943	0.0799082
5122.06	13.4851	0.00120149	-1.1506	0.0461226
5125.37	13.8843	0.0177756	-1.56047	0.163157
5148.39	14.1264	0.00107391	-1.33504	0.0647633
5135.51	13.5615	0.00333236	-1.21104	0.10061
5145.51	14.234	0.00969984	-1.68114	0.16692
5206.9	14.9406	0.00138343	-1.34599	0.190553
5227.47	15.0252	0.00105051	-1.27518	0.0664296
5227.07	15.1694	0.00307194	-1.22987	0.0833502
5268.19	15.7214	0.0067301	-1.01836	0.0960286
5246.9	15.9761	0.0139327	-2.18599	0.140403
5264.49	16.0523	0.00118448	-1.30222	0.0493915
5267.03	16.1625	0.00142019	-1.624	0.0629526
5287.68	16.361	0.00137713	-0.904847	0.0572918
5286.8	16.384	0.00356534	-1.32438	0.304283
5330.98	17.228	0.00111789	-1.3445	0.0735278
5378.58	18.3065	0.00119624	-1.30896	0.0621902

## Sheet: fig5
	T3_main				T1				T2				T4				T5				T6
Elevation (m a.s.l.)	dh/dt (m a-1)	S.D. of dh/dt (m a-1)	flow velocity (m a-1)	S.D. of flow velocity (m a-1)	dh/dt (m a-1)	S.D. of dh/dt (m a-1)	flow velocity (m a-1)	S.D. of flow velocity (m a-1)	dh/dt (m a-1)	S.D. of dh/dt (m a-1)	flow velocity (m a-1)	S.D. of flow velocity (m a-1)	dh/dt (m a-1)	S.D. of dh/dt (m a-1)	flow velocity (m a-1)	S.D. of flow velocity (m a-1)	dh/dt (m a-1)	S.D. of dh/dt (m a-1)	flow velocity (m a-1)	S.D. of flow velocity (m a-1)	dh/dt (m a-1)	S.D. of dh/dt (m a-1)	flow velocity (m a-1)	S.D. of flow velocity (m a-1)
4575	-0.17064	0.249808	2.65542	1.2027
4625	-0.428769	0.34816	2.62846	1.42584
4675	-0.475302	0.377273	3.79714	1.83788
4725	-0.474995	0.374106	5.06597	2.20492
4775	-0.768147	0.429086	7.98387	6.07422
4825	-0.612724	0.396651	9.10278	7.18099
4875	-0.819448	0.395019	3.94477	1.87575
4925	-0.885562	0.314544	6.51742	2.3597
4975	-0.771968	0.302075	9.84325	2.96218
5025	-0.699571	0.372696	11.5211	2.59989
5075	-0.68232	0.301714	11.0225	3.13883																	-0.73804	0.240689	13.0346	5.76163
5125	-0.904888	0.32657	11.5909	4.45665									-1.3178	0.381738	19.4	0.725718	-0.829937	0.207896	18.375	0.759523	-0.514806	0.277706	29.2458	8.06844
5175	-0.825571	0.341412	7.28278	3.50112									-0.878483	0.280374	20.6208	2.52526	-0.790807	0.245587	20.9544	4.28858	-0.414585	0.162058	33.7222	9.27865
5225	-1.08863	0.457642	4.93651	1.54162									-0.748739	0.151906	28.9509	4.37405	-0.751094	0.144243	22.277	7.05002	-0.331326	0.157986	34.1533	10.8777
5275	-1.01934	0.411479	4.20415	1.20145									-0.560341	0.0967	37.0314	2.23284	-0.51106	0.101648	37.652	8.5069	-0.207	0.0998	38.5167	11.755
5325	-0.987354	0.274043	4.34328	1.13693									-0.573047	0.145688	37.861	2.0194	-0.383985	0.0925	38.7556	13.3906	-0.216045	0.105355	34.0273	11.7404
5375	-0.973591	0.369203	4.13092	1.4068									-0.643349	0.199412	35.3929	3.95699	-0.370882	0.110835	52.6381	3.09913	-0.142907	0.113461	30.3528	14.8458
5425	-1.04377	0.352163	5.21563	1.9646	-0.935	0.219985	7.93824	1.98805					-0.524701	0.142999	40.9667	4.74845	-0.170371	0.100916	58.1077	2.70163	-0.0472	0.132793	26.9467	11.9957
5475	-1.13616	0.351786	5.09512	2.82868	-0.831508	0.249435	9.95	2.53773					-0.45667	0.146409	33.8	6.89222	-0.00383	0.122408	58.5351	4.71766	0.004	0.0803	37.3	0
5525	-0.895218	0.250964	8.82222	3.31834	-0.706952	0.210849	15.3478	2.98011					-0.394363	0.241311	37.2476	5.40719	0.0721	0.112371	57.351	6.75041
5575	-0.652614	0.267615	13.1404	4.04178	-0.512384	0.21454	17.875	3.49489					-0.383192	0.10783	40.56	12.2239	0.129222	0.111456	55.4909	9.35739
5625	-0.520841	0.175093	20.8711	5.15796	-0.518007	0.167486	24.036	4.25724	-0.368556	0.324785	5.25	6.22788	-0.242143	0.0781	32.2	12.1647
5675	-0.2755	0.131156	20.8067	9.0384	-0.288921	0.197414	26.0073	9.39532	-0.0858	0.316277	4.71064	3.82974
5725	0.0412	0.120212	26.19	7.6799	-0.267946	0.265	28.7032	10.5441	0.0365	0.264202	5.46533	3.29596
5775	0.0833	0.131771	26.3867	7.26916	-0.355935	0.318365	36.5952	13.9351	-0.019	0.283107	8.36813	3.10801
5825	0.0422	0.139875	31.4119	7.51602	-0.117813	0.231039	41.085	9.1746	-0.0221	0.209486	10.3523	2.07972
5875	0.0398	0.172117	29.3061	5.41062					0.180235	0.20033	10.6646	1.48415
5925	0.0814	0.186989	33.6082	6.43174
5975	0.110073	0.182863	36.6736	5.75021
6025	0.186479	0.137266	34.1774	5.10536
6075	0.22571	0.0698	31.6429	2.55092
Tributary	Elevation of debris boundary (m a.s.l.)	S.D. of the boundary elevation (m)
1	5526.57	28.2301
2	5773.76	33.3851
3	5594.04	38.7913
4	5424.62	31.3242
5	5170.43	36.5687
6	5101.62	22.7931

## Sheet: fig6
T3	dh/dt (m a-1)	S.D. of dh/dt (m a-1)	flow velocity (m a-1)	S.D. of flow velocity (m a-1)	pond area fraction (%)
4575	-0.17064	0.249808	2.65542	1.2027	1.36036
4625	-0.428769	0.34816	2.62846	1.42584	0.118765
4675	-0.475302	0.377273	3.79714	1.83788	0
4725	-0.474995	0.374106	5.06597	2.20492	0.0652
4775	-0.768147	0.429086	7.98387	6.07422	6.93923
4825	-0.612724	0.396651	9.10278	7.18099	0.757805
4875	-0.819448	0.395019	3.94477	1.87575	1.39524
4925	-0.885562	0.314544	6.51742	2.3597	4.22803
4975	-0.771968	0.302075	9.84325	2.96218	0.85491
5025	-0.699571	0.372696	11.5211	2.59989	0.640697
5075	-0.68232	0.301714	11.0225	3.13883	1
5125	-0.904888	0.32657	11.5909	4.45665	4.10623
5175	-0.825571	0.341412	7.28278	3.50112	0.219298
5225	-1.08863	0.457642	4.93651	1.54162	3.28571
5275	-1.01934	0.411479	4.20415	1.20145	2.57732
5325	-0.987354	0.274043	4.34328	1.13693	0.329949
5375	-0.973591	0.369203	4.13092	1.4068	0.218892
5425	-1.04377	0.352163	5.21563	1.9646	0
5475	-1.13616	0.351786	5.09512	2.82868	0
5525	-0.895218	0.250964	8.82222	3.31834	0
5575	-0.652614	0.267615	13.1404	4.04178	0
