# Supplementary material for: Surface lowering of the debris-covered area of Kanchenjunga Glacier in the eastern Nepal Himalaya since 1975, as revealed by Hexagon KH-9 and ALOS satellite observations
Source: Copernicus journal article supplement (doi:10.5194/tc-11-2815-2017), 2017-12-11
Supplement: Supplementary file [file tc-11-2815-2017-supplement-title-page.pdf › tc-11-2815-2017-supplement-title-page.pdf]

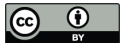

## *Supplement of*

# **Surface lowering of the debris-covered area of Kanchenjunga Glacier in the eastern Nepal Himalaya since 1975, as revealed by Hexagon KH-9 and ALOS satellite observations**

**D. Lamsal et al.**

*Correspondence to:* Koji Fujita ([cozy@nagoya-u.jp](mailto:cozy@nagoya-u.jp))

- [tc-11-2815-2017-supplement-title-page.pdf](#)
- [lamsal2017tc\\_supplement](#)
  - [.DS\\_Store](#)
  - [dem\\_alos\\_2010\\_utm45n.tif](#)
  - [lamsal2017tc\\_supplement.xlsx](#)

The copyright of individual parts of the supplement might differ from the CC BY 3.0 License.
